# Supplementary material
Source: PubMed Central journal article supplement (PMC6839953)
Supplement: bloodBLD2019000802-suppl1.pdf [file bloodBLD2019000802-suppl1.pdf]

**Supplemental materials for “circMYBL2, a circRNA from *MYBL2*, Regulates *FLT3* Translation by Recruiting PTBP1 to Promote *FLT3*-ITD-positive AML Progression”**

**Supplemental Figures**

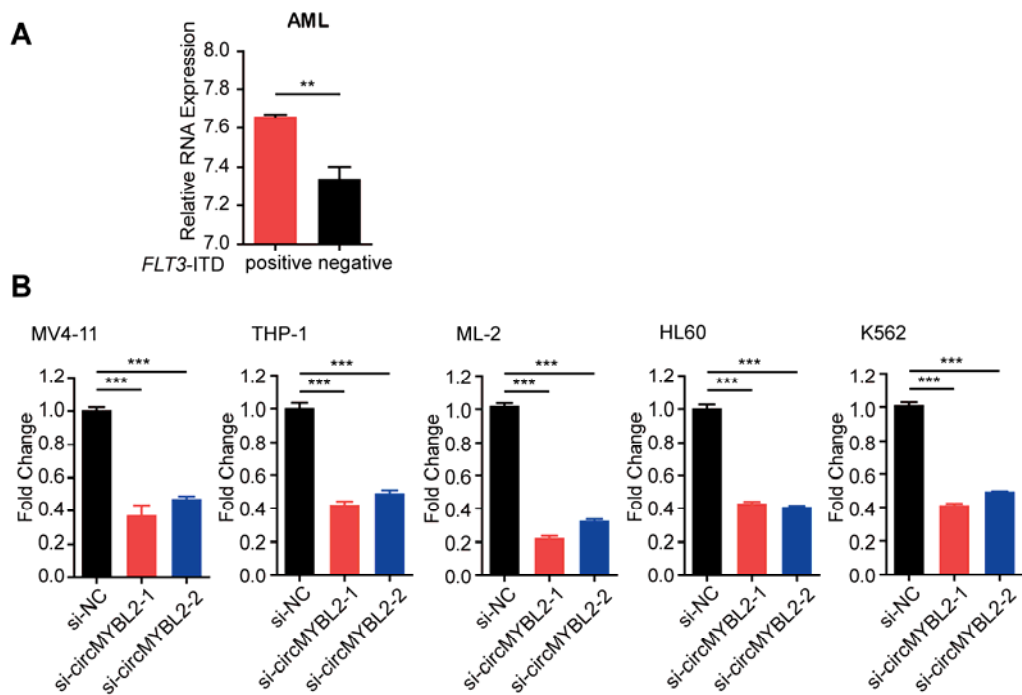

**Supplemental Figure 1. Differential analysis and knockdown efficiency of circMYBL2.** (A) Differential analysis of circMYBL2 between *FLT3*-ITD-positive and -negative AML in GSE94591 data. (B) The efficiency of circMYBL2 knockdown in different cell lines.

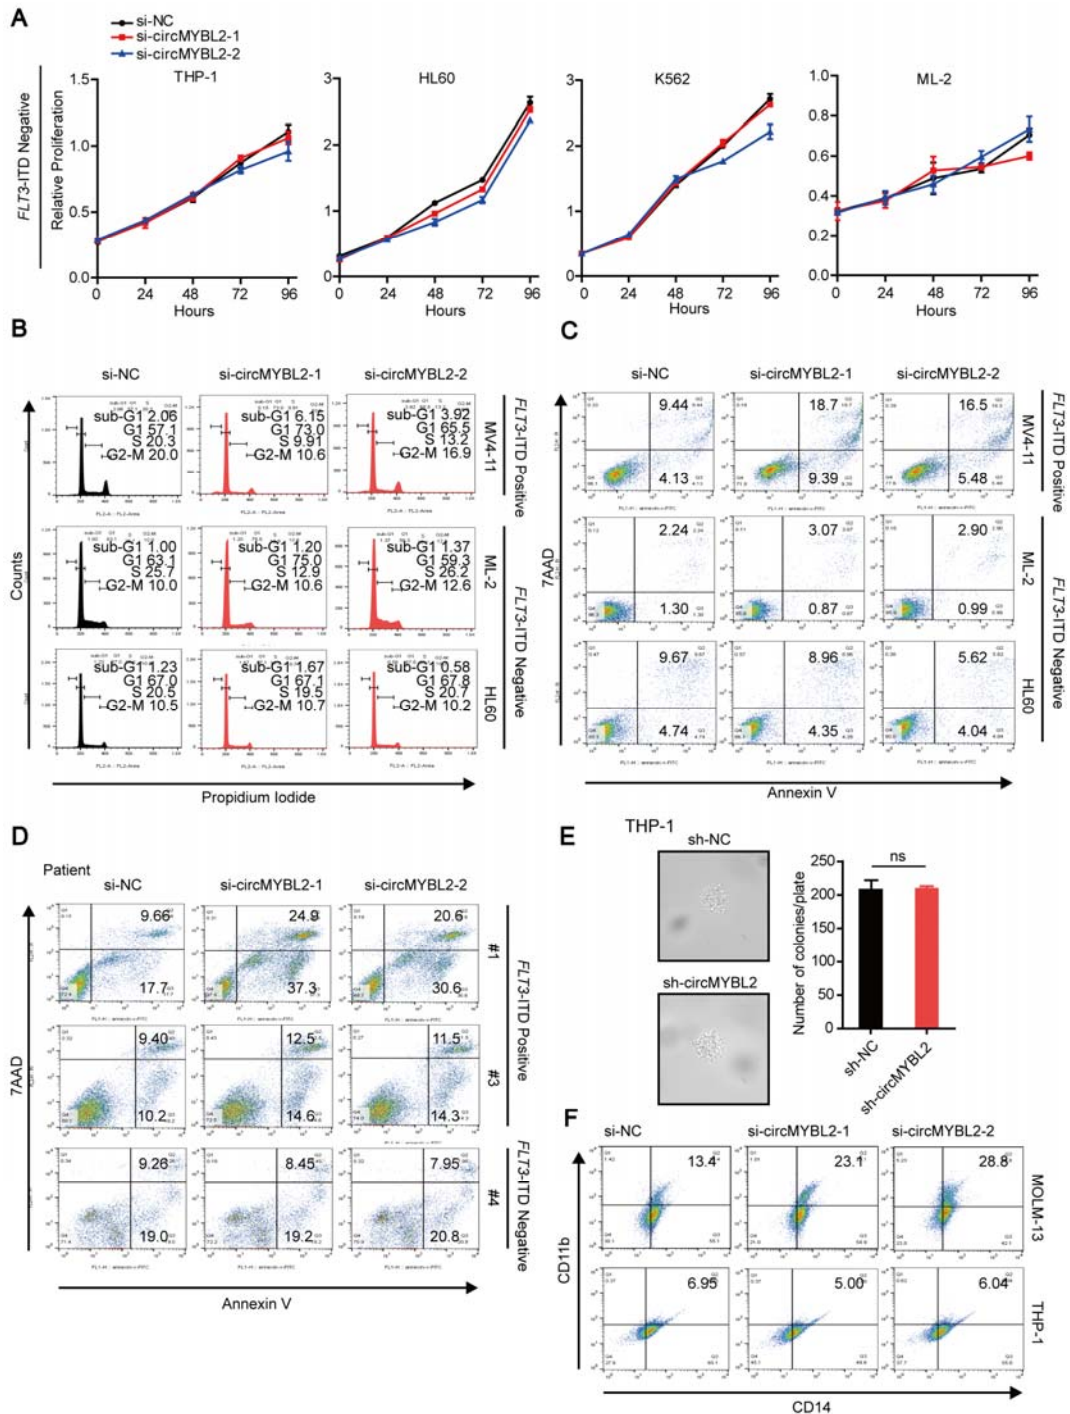

**Supplemental Figure 2. Requirement for circMYBL2 in *FLT3*-ITD AML cells.** (A) Effect of circMYBL2 knockdown on proliferation in *FLT3*-ITD-negative AML cells. (B) Flow cytometric analysis of cell cycle progression in AML cells. (C-D) Flow cytometric analysis of apoptosis in AML cell lines and AML patient cells. Numbers indicate percentage of cells. (E) Effect of circMYBL2 suppression in methylcellulose cultures of *FLT3*-ITD-negative AML THP-1 cells. (F) Flow cytometric analysis of differentiation. Numbers indicate percentage of cells.

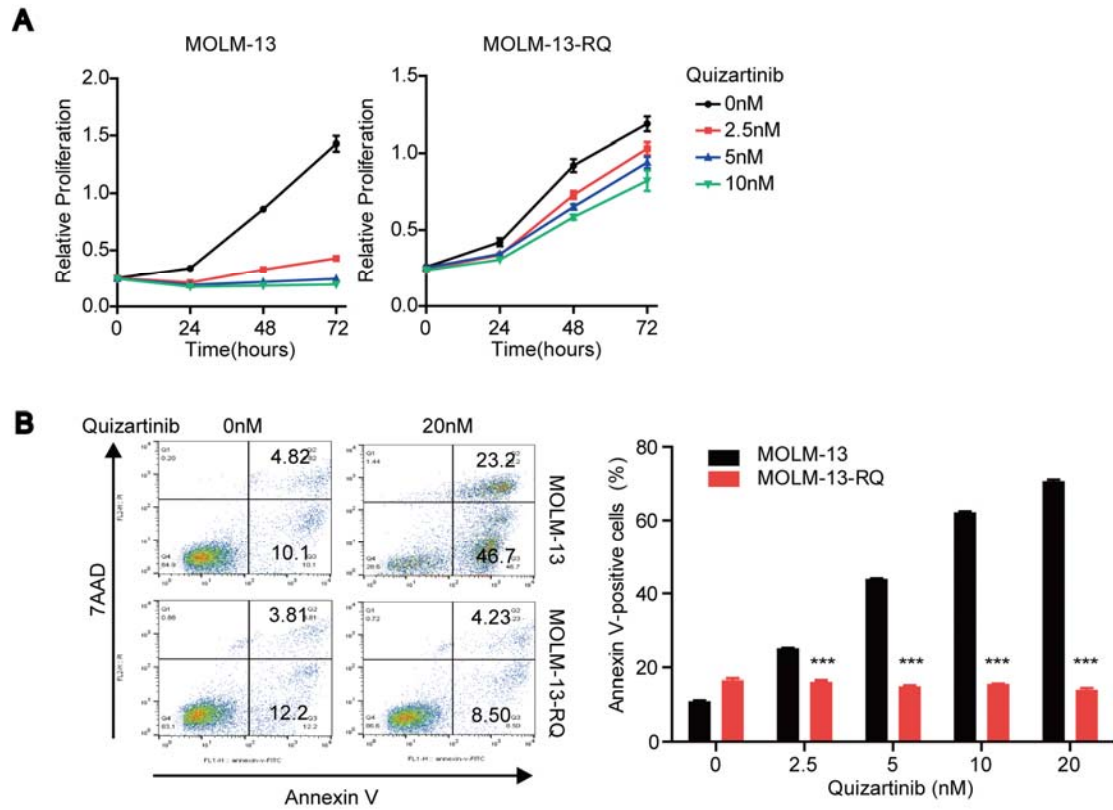

**Supplemental Figure 3. MOLM-13-RQ was insensitive to quizartinib compared to parental MOLM-13.** (A) Effect of quizartinib on the proliferation of MOLM-13 or MOLM-13-RQ cells. (B) Flow cytometric analysis of apoptosis. Numbers indicate percentage of cells.

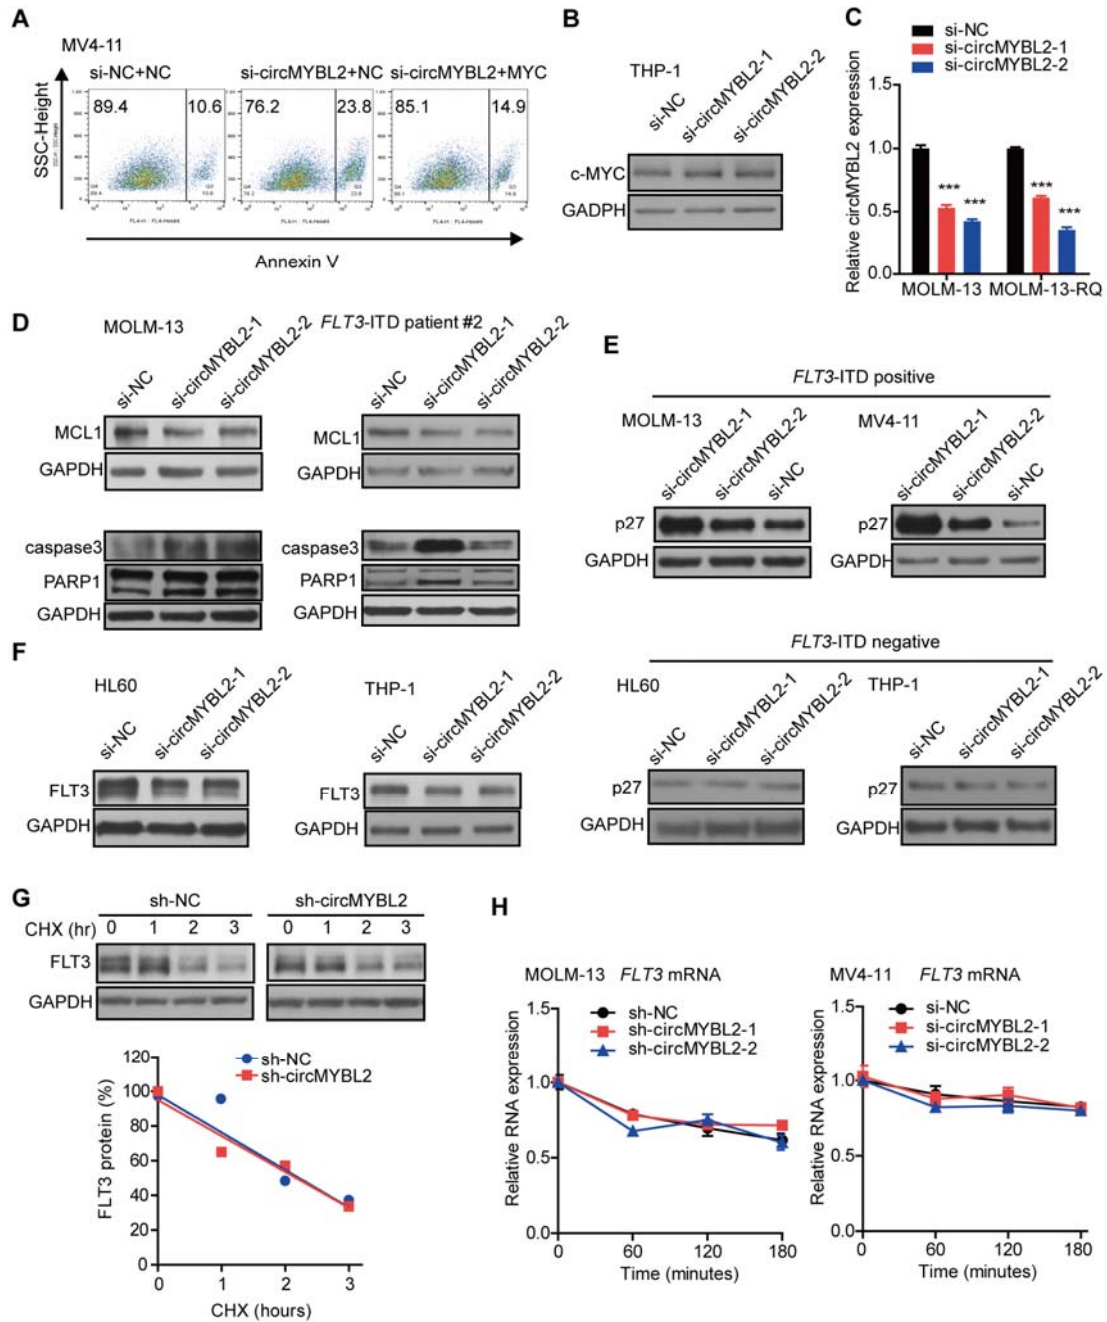

**Supplemental Figure 4. CircMYBL2 regulates *FLT3*-ITD-dependent signaling pathways.** (A) Flow cytometric analysis of apoptosis in MV4-11 upon circMYBL2 knockdown or c-MYC overexpression. (B) Western blot showing no effect of circMYBL2 knockdown on c-MYC in THP-1. (C) QPCR measuring efficiency of circMYBL2 knockdown in MOLM-13 or MOLM-13-RQ. (D) Western blot showing decrease of MCL1 and activation of caspase-3 in MOLM-13 and *FLT3*-ITD AML patient cells upon circMYBL2 knockdown. (E) Upregulation of p27/Kip1 in MOLM-13 and MV4-11, but not HL60 and THP-1, with si-circMYBL2 treatment. (F) CircMYBL2 knockdown also affects wild-type *FLT3*. (G) *FLT3* kinase levels were assessed upon circMYBL2 knockdown by western blot after CHX treatment. The relative intensity of the *FLT3* band was normalized to GAPDH. (H) mRNA stability of *FLT3* in MOLM-13 or MV4-11 cells upon circMYBL2 knockdown.

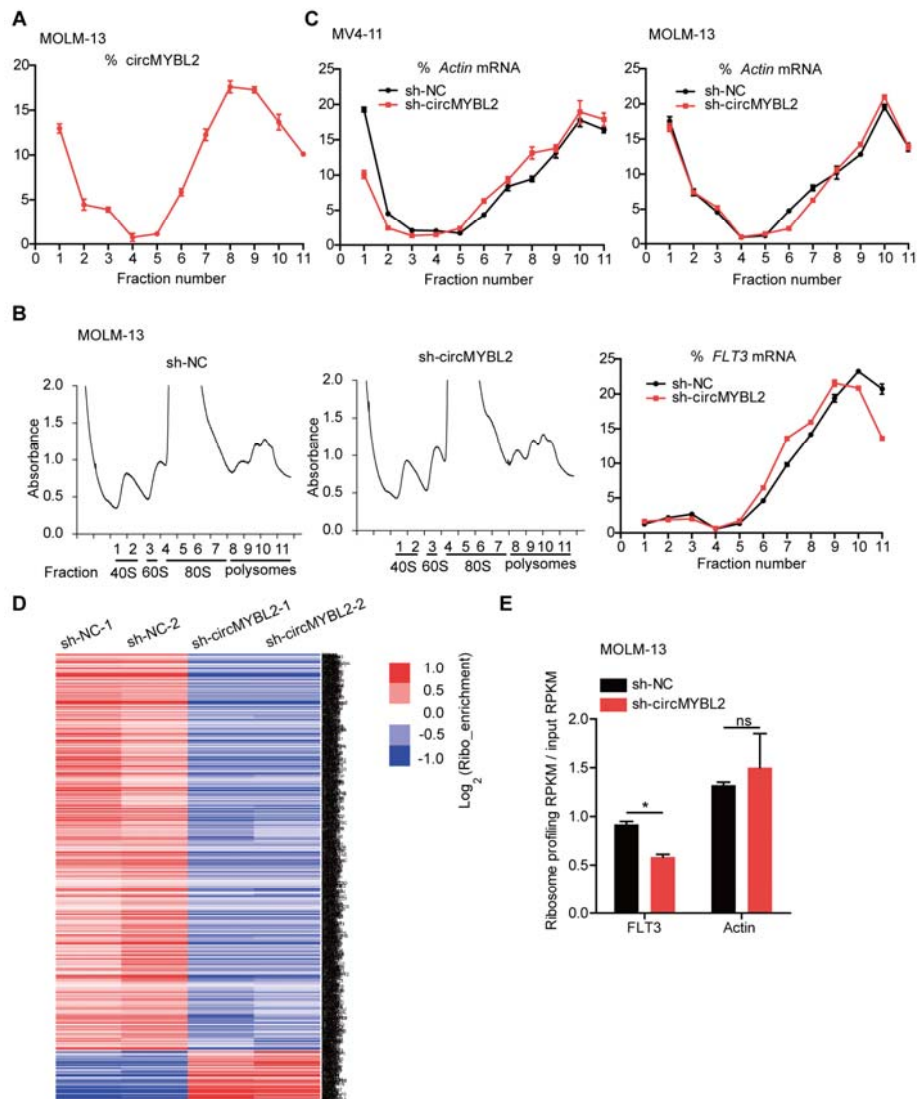

**Supplemental Figure 5. CircMYBL2 modulates the translation of FLT3 kinase.**

(A) Polysomes were fractionated using sucrose gradients, and relative levels of circMYBL2 were analyzed by qRT-PCR in gradient fractions. (B) Polysomes in cytoplasmic extracts of MOLM-13 cells upon circMYBL2 knockdown or control were fractionated through sucrose gradients, and the relative levels of *FLT3* mRNA were analyzed by qRT-PCR in gradient fractions. (C) Relative levels of Actin were analyzed by qRT-PCR in gradient fractions of MV4-11 or MOLM-13 cell lysates as a control. (D) RNAs with changed efficiency of ribosome occupancy measured via ribosome profiling in MOLM-13 upon circMYBL2 knockdown. (E) Ribosome profiling measuring translational efficiency of *FLT3* mRNA upon circMYBL2 suppression, Actin as a control. Error bars represent the mean  $\pm$  standard error of the mean.



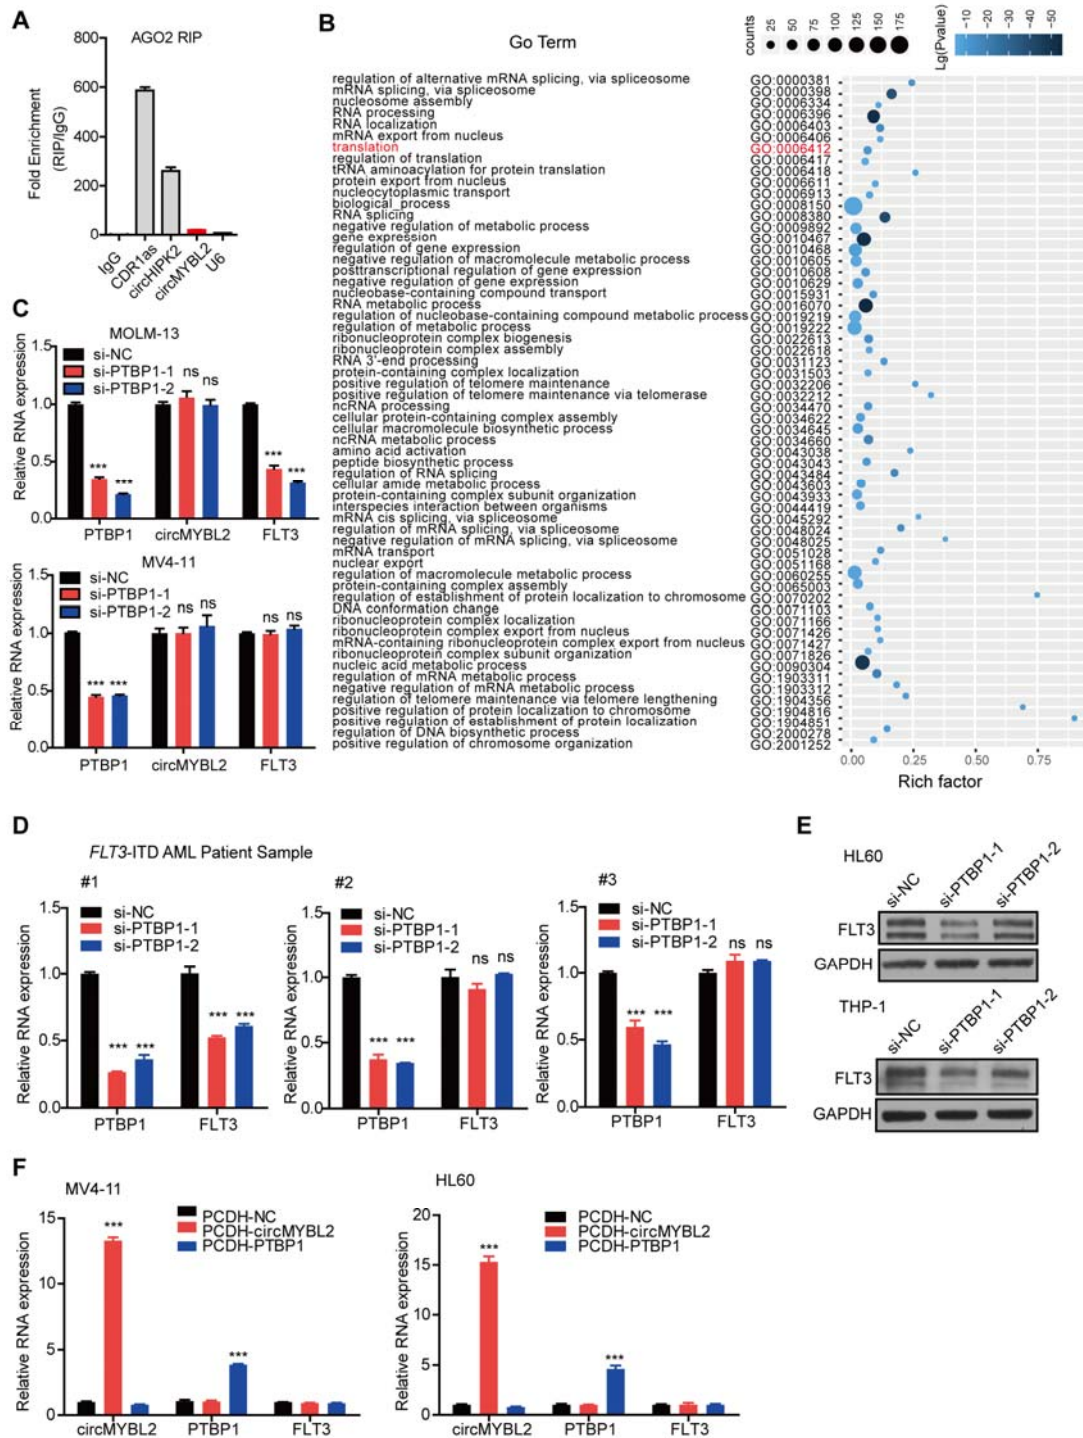

**Supplemental Figure 6. CircMYBL2 interacts with PTBP1 to affect the FLT3 protein.** (A) RNA immunoprecipitation (RIP) of AGO2. Analysis of precipitated RNAs (CDR1as, circHIPK2, positive controls; U6, negative control). (B) GO analysis annotates the biological process and clusters the modules of genes. The top 60 cluster ranked by p value was shown. (C-D) QPCR measuring mRNA expression of *FLT3* upon PTBP1 knockdown in MOLM-13, MV4-11 and AML patient cells. (E) Effect of PTBP1 knockdown on wild-type FLT3. (F) QPCR measuring upregulation of FLT3 protein upon overexpression of either circMYBL2 or PTBP1 in AML cell line MV4-11 and HL60.

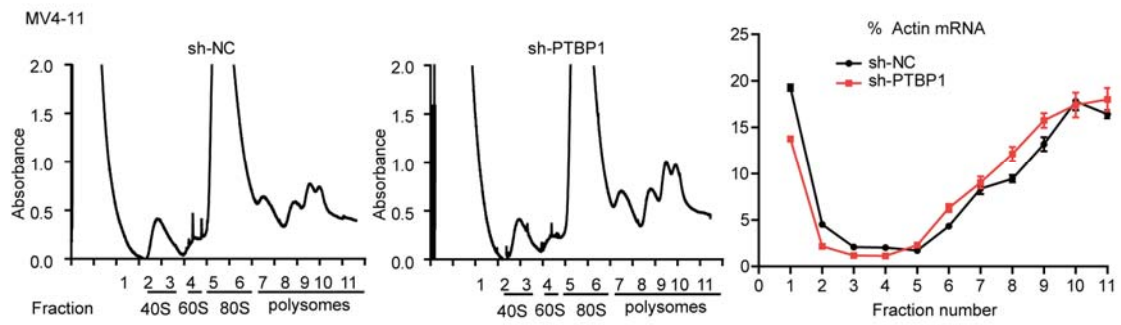

**Supplemental Figure 7.** Relative levels of Actin were analyzed by qRT-PCR in gradient fractions of MV4-11 lysate as a control in polysome profiling assay.

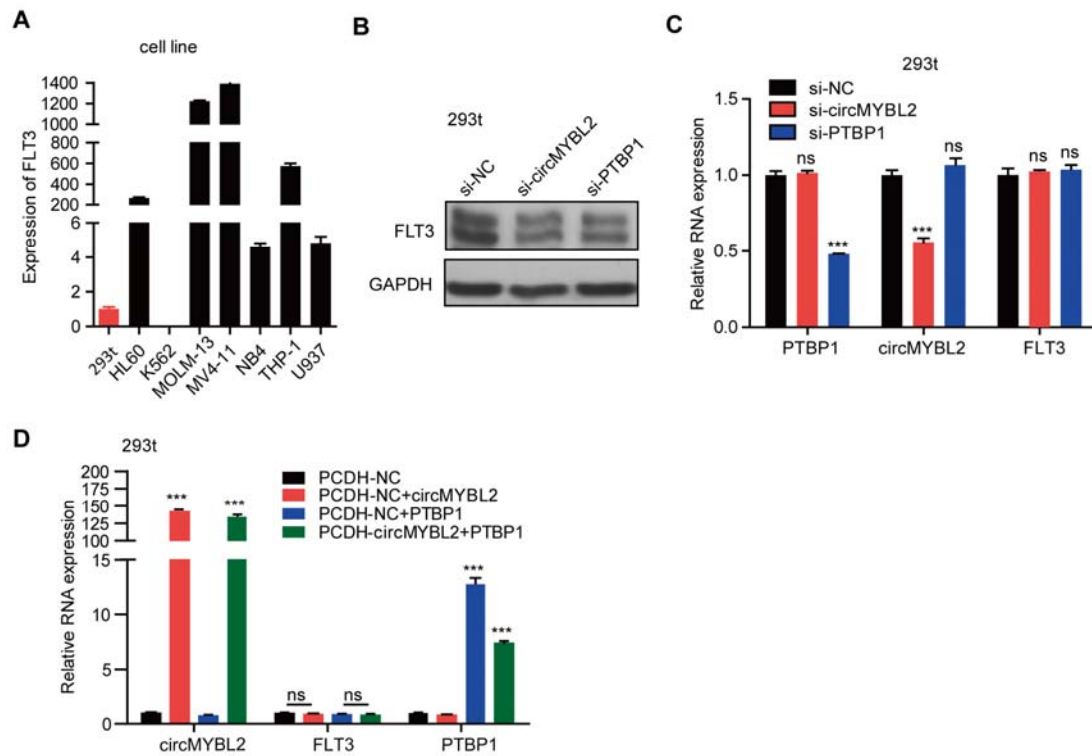

**Supplemental Figure 8. CircMYBL2 recruits PTBP1 to promote FLT3/FLT3-ITD protein translation.** (A) QPCR measuring *FLT3* expression level in 293t cells. (B) Western blot showing downregulation of FLT3 protein upon circMYBL2 or PTBP1 knockdown in 293t. (C) QPCR measuring mRNA expression of *FLT3* upon circMYBL2 or PTBP1 knockdown in 293t cells. (D) QPCR measuring mRNA expression of *FLT3* upon overexpression of either circMYBL2 or PTBP1 in 293t cells.



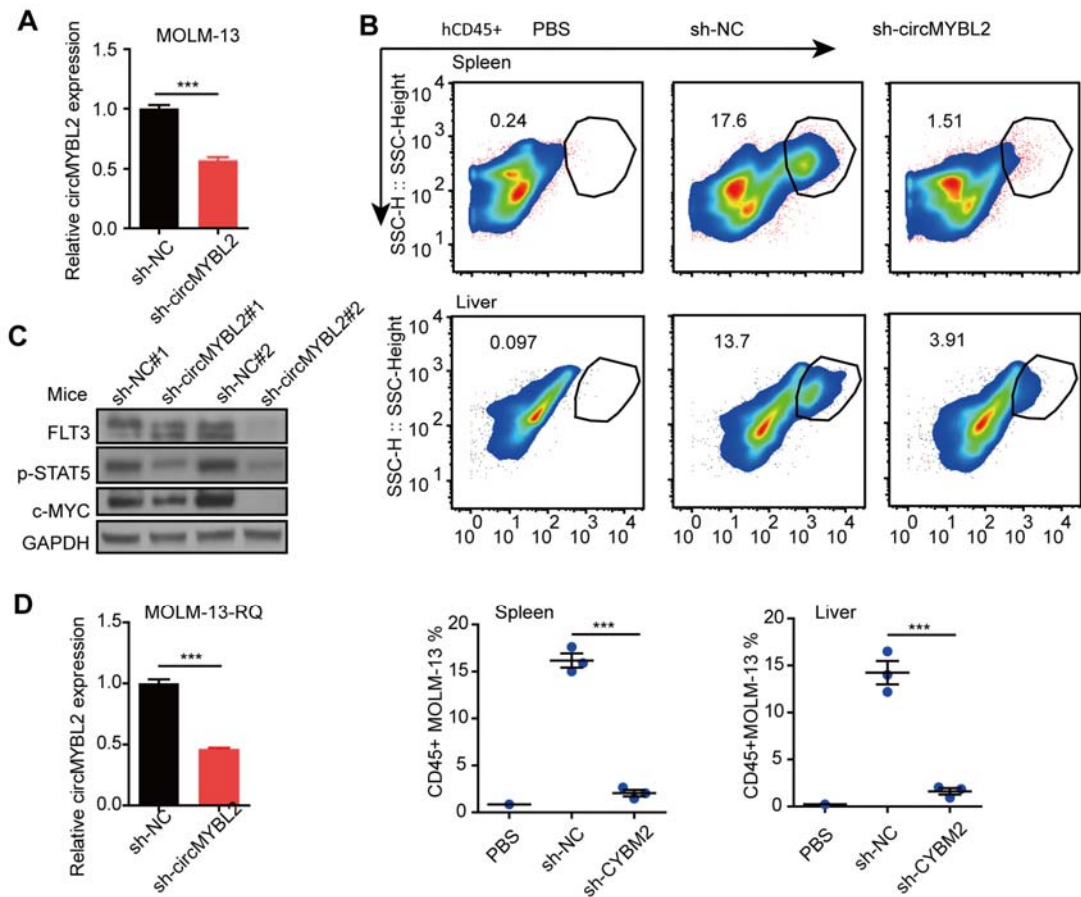

**Supplemental Figure 9. CircMYBL2 knockdown impairs infiltration of FLT3-ITD AML cells *in vivo*.** (A) Efficiency of circMYBL2 knockdown in sh-circMYBL2 MOLM-13 compared to sh-NC one. (B) Flow cytometry showing decreased levels of hCD45+ cells in the spleen and liver in circMYBL2-knockdown mice. (C) Western blot showing protein levels of FLT3, p-STAT5, and c-MYC in the MOLM-13-infiltrated Lymph nodes from mice. (D) Efficiency of circMYBL2 knockdown in sh-circMYBL2 MOLM-13-RQ compared to sh-NC one.

## Supplemental Tables

**Supplemental Table 1. AML patient samples used in this study**

| Characteristics            | <i>FLT3</i> -ITD-positive | <i>FLT3</i> -ITD-negative |
|----------------------------|---------------------------|---------------------------|
|                            | AML(n=6)                  | AML(n=45)                 |
| <b>Age at diagnosis, y</b> | 45 (29-70)                | 30 (5-72)                 |
| <b>Sex</b>                 |                           |                           |
| <b>Male</b>                | 2                         | 30                        |
| <b>Female</b>              | 4                         | 15                        |
| <b>FAB</b>                 |                           |                           |
| <b>M1</b>                  | 0                         | 1                         |
| <b>M2</b>                  | 0                         | 8                         |
| <b>M3</b>                  | 1                         | 17                        |
| <b>M4</b>                  | 1                         | 2                         |
| <b>M5</b>                  | 3                         | 6                         |
| <b>M6</b>                  | 0                         | 0                         |
| <b>M7</b>                  | 0                         | 0                         |
| <b>N/A</b>                 | 1                         | 11                        |

**Supplemental Table 2. The 373 circRNAs differentially expressed in *FLT3-ITD* positive AML compared with the negative.**

| circRNA ID       | Parental Gene   | Poor vs Better | P Value     | circRNA ID       | Parental Gene | Poor vs Better | P Value     |
|------------------|-----------------|----------------|-------------|------------------|---------------|----------------|-------------|
| hsa_circ_0002346 | CRIM1           | 0.173750848    | 0.002565538 | hsa_circ_0005571 | IFI30         | 1.286575043    | 0.000694958 |
| hsa_circ_0005579 | CRIM1           | 0.31303713     | 0.007051797 | hsa_circ_0007772 | RPS6KC1       | 1.288516655    | 0.002417079 |
| hsa_circ_0081672 | POLR2J          | 0.321556965    | 0.003934131 | hsa_circ_0047073 | ESCO1         | 1.295498216    | 0.005779615 |
| hsa_circ_0001212 | GUSBP11         | 0.332645522    | 0.007731131 | hsa_circ_0004896 | EXOSC1        | 1.295925936    | 0.002037588 |
| hsa_circ_0080638 | GATSL1          | 0.339221561    | 0.006068839 | hsa_circ_0025767 | TMTC1         | 1.300532268    | 0.000266337 |
| hsa_circ_0074269 | ANKHD1-EIF4EBP3 | 0.34713632     | 0.000157645 | hsa_circ_0027470 | NUP107        | 1.305417363    | 0.00601696  |
| hsa_circ_0005243 | TMEM184B        | 0.387382529    | 0.00826799  | hsa_circ_0007905 | STX6          | 1.307164086    | 0.004012138 |
| hsa_circ_0005572 | KIAA1797        | 0.38949266     | 0.002240966 | hsa_circ_0003572 | RFWD2         | 1.308169159    | 0.007897198 |
| hsa_circ_0002891 | PDIA3           | 0.394636836    | 0.003562792 | hsa_circ_0085567 | FAM49B        | 1.322341543    | 0.006410063 |
| hsa_circ_0021727 | CD44            | 0.401910946    | 0.00044973  | hsa_circ_0005385 | PHKB          | 1.325084265    | 0.00288686  |
| hsa_circ_0005442 | CRIM1           | 0.403752282    | 0.000873358 | hsa_circ_0015358 | RFWD2         | 1.330557613    | 0.003250819 |
| hsa_circ_0021728 | CD44            | 0.403949781    | 1.76432E-05 | hsa_circ_0000217 | FAM107B       | 1.331248307    | 0.005148385 |
| hsa_circ_0040921 | ANKRD11         | 0.414579439    | 0.003335446 | hsa_circ_0008777 | AURKA         | 1.334016361    | 0.006255584 |
| hsa_circ_0092315 | PWP2            | 0.417300124    | 0.000404888 | hsa_circ_0059181 | FKBP1A        | 1.337421172    | 0.002886066 |
| hsa_circ_0074930 | SLIT3           | 0.423606588    | 0.000100453 | hsa_circ_0006225 | MND1          | 1.352763423    | 0.009435071 |
| hsa_circ_0024824 | ST3GAL4         | 0.424235241    | 5.08053E-05 | hsa_circ_0068708 | DLG1          | 1.356496937    | 0.009807595 |
| hsa_circ_0002504 | ENGASE          | 0.433091445    | 0.000269707 | hsa_circ_0000861 | XLOC_012735   | 1.358820493    | 0.002487624 |
| hsa_circ_0011938 | SCMH1           | 0.444372137    | 0.006011991 | hsa_circ_0000026 | EIF4G3        | 1.367373839    | 0.004833824 |
| hsa_circ_0017643 | SFMBT2          | 0.46960568     | 0.005924796 | hsa_circ_0078563 | TCP1          | 1.369887117    | 0.006546661 |
| hsa_circ_0047145 | TMEM241         | 0.474094356    | 0.000244299 | hsa_circ_0004294 | EIF3L         | 1.370459535    | 0.006001245 |
| hsa_circ_0086490 | MLLT3           | 0.47583848     | 5.23952E-05 | hsa_circ_0001695 | HERPUD2       | 1.377431042    | 0.001901685 |
| hsa_circ_0046600 | B3GNTL1         | 0.476873994    | 0.005304138 | hsa_circ_0088058 | SUSD1         | 1.379801321    | 0.007882692 |
| hsa_circ_0055605 | TCONS_00004336  | 0.479417896    | 0.003520068 | hsa_circ_0082141 | SND1          | 1.387316926    | 0.005097705 |
| hsa_circ_0043138 | TAF15           | 0.482913762    | 0.006795836 | hsa_circ_0044907 | RPS6KB1       | 1.38751025     | 0.005574543 |
| hsa_circ_0007769 | PHACTR2         | 0.48617844     | 0.008044983 | hsa_circ_0039697 | CNOT1         | 1.39132836     | 0.003905485 |
| hsa_circ_0000912 | FCHO1           | 0.486804769    | 0.008565545 | hsa_circ_0045601 | <u>HN1</u>    | 1.394326572    | 0.008960542 |
| hsa_circ_0054970 | SLC1A4          | 0.490310074    | 0.00386076  | hsa_circ_0040356 | PHLPP2        | 1.398235394    | 0.008670681 |
| hsa_circ_0054971 | SLC1A4          | 0.493554189    | 0.009647907 | hsa_circ_0004030 | CTNNB1        | 1.398420922    | 0.004722574 |
| hsa_circ_0001947 | AFF2            | 0.496704156    | 0.002205922 | hsa_circ_0059512 | SNX5          | 1.40825168     | 0.007717573 |
| hsa_circ_0008078 | DOPEY2          | 0.498538141    | 0.002710043 | hsa_circ_0028048 | PRDM4         | 1.408374223    | 0.006125273 |
| hsa_circ_0004961 | MAD1L1          | 0.500582852    | 0.000437332 | hsa_circ_0005632 | INO80         | 1.412670393    | 0.002954707 |
| hsa_circ_0020545 | INPP5A          | 0.501596096    | 0.007591199 | hsa_circ_0008567 | ANKLE2        | 1.415905199    | 0.005371803 |
| hsa_circ_0056390 | SAP130          | 0.502673533    | 0.003430013 | hsa_circ_0082139 | SND1          | 1.416853507    | 0.000306942 |
| hsa_circ_0049201 | DNMT1           | 0.507250392    | 0.004911812 | hsa_circ_0003006 | <u>FLNB</u>   | 1.422203682    | 0.000716646 |
| hsa_circ_0007401 | NUP98           | 0.507294889    | 0.00276784  | hsa_circ_0000191 | PSEN2         | 1.42616932     | 0.000642085 |

|                  |              |             |             |                  |          |             |             |
|------------------|--------------|-------------|-------------|------------------|----------|-------------|-------------|
| hsa_circ_0063812 | CELSR1       | 0.511675015 | 0.003018375 | hsa_circ_0001623 | BACH2    | 1.426840789 | 0.006082843 |
| hsa_circ_0000915 | FKBP8        | 0.512147064 | 0.007136829 | hsa_circ_0001374 | CCDC50   | 1.4355546   | 0.004954311 |
| hsa_circ_0013204 | LOC100131564 | 0.512832645 | 0.002977726 | hsa_circ_0069618 | ATP8A1   | 1.442486728 | 0.000359628 |
| hsa_circ_0004946 | THAP4        | 0.517112346 | 0.008691268 | hsa_circ_0000296 | PHF21A   | 1.447531881 | 0.000895671 |
| hsa_circ_0036941 | VPS33B       | 0.518104036 | 0.009694038 | hsa_circ_0004673 | LMBR1    | 1.450737194 | 0.004041126 |
| hsa_circ_0005837 | UHRF1        | 0.524386159 | 0.000119258 | hsa_circ_0001222 | FBXO7    | 1.457931858 | 0.008481479 |
| hsa_circ_0000665 | UBE2I        | 0.533565503 | 0.001319363 | hsa_circ_0007693 | ERI3     | 1.45844554  | 0.00437303  |
| hsa_circ_0008250 | CCDC91       | 0.538492748 | 0.009391168 | hsa_circ_0003285 | N6AMT2   | 1.458773258 | 0.001472179 |
| hsa_circ_0030051 | ELF1         | 0.546582608 | 0.001527344 | hsa_circ_0000374 | ITFG2    | 1.463824266 | 0.00041218  |
| hsa_circ_0005795 | LPXN         | 0.549824603 | 0.004226478 | hsa_circ_0001006 | RTN4     | 1.463987074 | 0.00017668  |
| hsa_circ_0001538 | PAIP2        | 0.550854257 | 0.006621992 | hsa_circ_0018529 | SLC25A16 | 1.482784983 | 2.38655E-05 |
| hsa_circ_0007386 | CRIM1        | 0.551035292 | 0.001490679 | hsa_circ_0046965 | AFG3L2   | 1.493137995 | 0.001064446 |
| hsa_circ_0067301 | PLXND1       | 0.551320293 | 0.000257538 | hsa_circ_0007761 | ATXN7    | 1.494273166 | 0.005843749 |
| hsa_circ_0053958 | CRIM1        | 0.553033809 | 0.000465717 | hsa_circ_0007934 | ZFAT     | 1.516503752 | 0.003652007 |
| hsa_circ_0005620 | SH3PXD2A     | 0.557238329 | 8.20132E-05 | hsa_circ_0000754 | SSH2     | 1.520825279 | 0.0037598   |
| hsa_circ_0048104 | PTBP1        | 0.559844894 | 0.003225403 | hsa_circ_0002697 | MTHFD1L  | 1.52669717  | 2.41338E-06 |
| hsa_circ_0004345 | SEC24A       | 0.563192564 | 0.001788176 | hsa_circ_0088479 | DENND1A  | 1.527910657 | 0.000866981 |
| hsa_circ_0028711 | RAB35        | 0.567827509 | 0.004279147 | hsa_circ_0005434 | PPP2R3B  | 1.53616467  | 0.003029019 |
| hsa_circ_0092323 | MIER2        | 0.568198507 | 0.00286724  | hsa_circ_0019223 | PLCE1    | 1.537878804 | 0.004497782 |
| hsa_circ_0012651 | SSBP3        | 0.568497774 | 1.66403E-05 | hsa_circ_0007312 | SPECC1L  | 1.539861992 | 0.000856636 |
| hsa_circ_0069320 | GPR125       | 0.568701494 | 0.002912264 | hsa_circ_0007763 | NAA60    | 1.544390274 | 0.008765881 |
| hsa_circ_0031288 | PABPN1       | 0.56932274  | 0.000528257 | hsa_circ_0006371 | LCOR     | 1.555074088 | 0.009780695 |
| hsa_circ_0000871 | PIP5K1C      | 0.570030087 | 0.006022475 | hsa_circ_0002588 | RBMS2    | 1.57149376  | 0.004068924 |
| hsa_circ_0072386 | HMGCS1       | 0.572306029 | 0.009966731 | hsa_circ_0001977 | SNX5     | 1.572727733 | 0.008586845 |
| hsa_circ_0015004 | SDHC         | 0.574611974 | 0.003769524 | hsa_circ_0001330 | TIMMDC1  | 1.576765103 | 0.002385131 |
| hsa_circ_0002356 | CAPNS1       | 0.581270987 | 0.001536534 | hsa_circ_0088474 | DENND1A  | 1.578881365 | 0.005139018 |
| hsa_circ_0001834 | SMARCA2      | 0.58169076  | 0.00437044  | hsa_circ_0088457 | DENND1A  | 1.580255004 | 0.000135552 |
| hsa_circ_0040784 | KLHDC4       | 0.582349324 | 0.001392211 | hsa_circ_0007376 | MAP2K2   | 1.583256136 | 0.004640394 |
| hsa_circ_0088777 | TRUB2        | 0.587207073 | 0.006332414 | hsa_circ_0000690 | ITGAL    | 1.585458167 | 0.005469078 |
| hsa_circ_0057319 | ITGAV        | 0.588506175 | 0.004561944 | hsa_circ_0008144 | PDE5A    | 1.586148553 | 0.000747301 |
| hsa_circ_0008044 | EWSR1        | 0.589592522 | 0.006588861 | hsa_circ_0008234 | FOXP1    | 1.589261188 | 0.005841677 |
| hsa_circ_0029636 | ZMYM2        | 0.592408065 | 0.000987288 | hsa_circ_0001558 | UIMC1    | 1.59038356  | 0.008325535 |
| hsa_circ_0047997 | ZNF236       | 0.596372227 | 0.008660429 | hsa_circ_0003278 | G3BP1    | 1.5933895   | 0.002973745 |
| hsa_circ_0002768 | MYLK         | 0.600675692 | 0.007416843 | hsa_circ_0067127 | ALDH1L1  | 1.598446894 | 0.009604191 |
| hsa_circ_0018838 | AGAP5        | 0.60327533  | 0.001289183 | hsa_circ_0046882 | PPP4R1   | 1.59926893  | 5.4224E-05  |
| hsa_circ_0087293 | TLE4         | 0.60413514  | 0.00391263  | hsa_circ_0006229 | TNS3     | 1.600726142 | 0.009919167 |
| hsa_circ_0078738 | WDR27        | 0.604374879 | 0.000736327 | hsa_circ_0001497 | GFM2     | 1.601684172 | 0.008565047 |
| hsa_circ_0030342 | VPS36        | 0.610903574 | 0.001227779 | hsa_circ_0001571 | RIPK1    | 1.601711356 | 0.000218891 |
| hsa_circ_0004957 | TRMT2B       | 0.612396821 | 0.004292621 | hsa_circ_0004006 | TANC2    | 1.628303882 | 0.00260726  |

|                  |                   |             |             |                  |          |             |             |
|------------------|-------------------|-------------|-------------|------------------|----------|-------------|-------------|
| hsa_circ_0070610 | PAPSS1            | 0.612608173 | 0.007688004 | hsa_circ_0088467 | DENND1A  | 1.630737119 | 0.000672019 |
| hsa_circ_0002507 | TCF25             | 0.613201351 | 0.001600484 | hsa_circ_0009076 | NRD1     | 1.631582217 | 0.000576964 |
| hsa_circ_0006209 | CTDP1             | 0.615162347 | 0.000666771 | hsa_circ_0000681 | PRKCB    | 1.632275712 | 0.004516864 |
| hsa_circ_0070382 | AFF1              | 0.617233744 | 0.002012582 | hsa_circ_0038608 | EARS2    | 1.633285027 | 8.83287E-05 |
| hsa_circ_0016650 | LBR               | 0.618362202 | 0.008572679 | hsa_circ_0040609 | PLCG2    | 1.645765427 | 0.006526616 |
| hsa_circ_0087283 | TLE4              | 0.620570034 | 0.009317869 | hsa_circ_0002037 | XPO5     | 1.646858414 | 0.007967428 |
| hsa_circ_0000332 | PC                | 0.624880956 | 0.004227776 | hsa_circ_0026652 | PCBP2    | 1.657632323 | 0.003415617 |
| hsa_circ_0036005 | SMAD6             | 0.6299773   | 0.001495884 | hsa_circ_0009098 | TPX2     | 1.668764705 | 0.004428861 |
| hsa_circ_0047700 | ME2               | 0.637328749 | 0.000661065 | hsa_circ_0008225 | ZMYND11  | 1.683641012 | 0.002250215 |
| hsa_circ_0092281 | PTGES2            | 0.641468856 | 0.005813261 | hsa_circ_0004816 | SNX5     | 1.68921232  | 0.000792871 |
| hsa_circ_0063305 | CSNK1E            | 0.641806424 | 0.003273204 | hsa_circ_0002544 | DENND1A  | 1.695227626 | 0.000311101 |
| hsa_circ_0075402 | GNB2L1            | 0.643873374 | 0.006612686 | hsa_circ_0008365 | SERPINE2 | 1.697881825 | 0.002762483 |
| hsa_circ_0048344 | AP3D1             | 0.644305972 | 0.005060807 | hsa_circ_0043947 | BRCA1    | 1.701248038 | 0.0018562   |
| hsa_circ_0009006 | LDB2              | 0.649193723 | 0.003491289 | hsa_circ_0008678 | KIAA1797 | 1.710062776 | 0.000343588 |
| hsa_circ_0001377 | TNK2              | 0.652978162 | 2.82578E-05 | hsa_circ_0038348 | C16orf62 | 1.71853709  | 0.000390039 |
| hsa_circ_0068702 | DLG1              | 0.653827787 | 0.004438186 | hsa_circ_0000184 | KCTD3    | 1.719385156 | 0.000264339 |
| hsa_circ_0015966 | RNPEP             | 0.654515574 | 0.0080732   | hsa_circ_0041829 | NEURL4   | 1.724883841 | 0.004190962 |
| hsa_circ_0000638 | ETFA              | 0.659048743 | 0.004820682 | hsa_circ_0067029 | PDIA5    | 1.726843359 | 0.000561219 |
| hsa_circ_0012107 | ST3GAL3           | 0.661288145 | 0.004868987 | hsa_circ_0004069 | SLC37A3  | 1.730211585 | 0.006673437 |
| hsa_circ_0009035 | RACGAP1           | 0.66212868  | 0.000670239 | hsa_circ_0089852 | TBL1X    | 1.733110184 | 0.009547777 |
| hsa_circ_0008773 | PICALM            | 0.665251351 | 0.002955593 | hsa_circ_0005909 | XPR1     | 1.743080259 | 0.002865371 |
| hsa_circ_0002003 | KIAA0146          | 0.665834056 | 0.00191468  | hsa_circ_0036231 | ARIH1    | 1.764607564 | 0.00182169  |
| hsa_circ_0066803 | ATG3              | 0.666441388 | 0.001912645 | hsa_circ_0092210 | DHRX     | 1.769299255 | 0.000431296 |
| hsa_circ_0015787 | DENND1B           | 0.671830275 | 0.000104461 | hsa_circ_0003670 | NEK9     | 1.772289422 | 1.91034E-05 |
| hsa_circ_0048492 | MFSD12            | 0.672694154 | 0.002895257 | hsa_circ_0003458 | PTBP3    | 1.773466932 | 0.005303148 |
| hsa_circ_0044949 | USP32             | 0.67336963  | 0.008638117 | hsa_circ_0006988 | LDLRAD3  | 1.789751429 | 0.005653684 |
| hsa_circ_0064379 | CAND2             | 0.674997784 | 0.007098894 | hsa_circ_0007798 | MAP3K5   | 1.801370598 | 0.007535505 |
| hsa_circ_0072387 | HMGCS1            | 0.676397565 | 0.002531193 | hsa_circ_0000009 | SKI      | 1.81028353  | 2.37591E-05 |
| hsa_circ_0001174 | TCONS_12_00016814 | 0.678508062 | 0.009578874 | hsa_circ_0004726 | ELMOD3   | 1.811627896 | 0.004117962 |
| hsa_circ_0002113 | IFNGR2            | 0.681360432 | 0.000518017 | hsa_circ_0003578 | CRIM1    | 1.813922267 | 0.000226928 |
| hsa_circ_0092135 | GAB3              | 0.681590311 | 0.005528782 | hsa_circ_0058698 | DIS3L2   | 1.817288423 | 0.002973682 |
| hsa_circ_0004945 | SPG7              | 0.682140423 | 0.00740769  | hsa_circ_0005311 | TRIO     | 1.826718882 | 0.002348855 |
| hsa_circ_0016123 | SOX13             | 0.682459582 | 0.006244491 | hsa_circ_0077892 | TBPL1    | 1.829545394 | 6.99173E-05 |
| hsa_circ_0000321 | SF1               | 0.682719842 | 0.001859028 | hsa_circ_0004039 | MTR      | 1.896018693 | 0.000362914 |
| hsa_circ_0084464 | PRKDC             | 0.68420416  | 0.000308242 | hsa_circ_0066875 | TIMMDC1  | 1.921096284 | 0.000594826 |
| hsa_circ_0003253 | BABAM1            | 0.685771714 | 0.007378897 | hsa_circ_0058429 | SGPP2    | 1.921497474 | 0.005771864 |
| hsa_circ_0058518 | AGFG1             | 0.696704797 | 0.003439091 | hsa_circ_0003141 | UBAP2    | 1.929271727 | 0.000266551 |
| hsa_circ_0048775 | LONP1             | 0.700490759 | 0.005404096 | hsa_circ_0006055 | C20orf30 | 1.957777373 | 0.000788274 |
| hsa_circ_0000825 | CCDC165           | 0.700640238 | 0.000758606 | hsa_circ_0005139 | RDH11    | 1.964000864 | 0.001215291 |



|                  |                   |             |             |                  |                      |             |             |
|------------------|-------------------|-------------|-------------|------------------|----------------------|-------------|-------------|
| hsa_circ_0000279 | HPS5              | 0.700805906 | 4.34812E-05 | hsa_circ_0002664 | PCCA                 | 1.964994552 | 0.004080146 |
| hsa_circ_0017441 | WDR37             | 0.70092009  | 0.000187764 | hsa_circ_0008420 | PCCA                 | 1.969036892 | 0.007730748 |
| hsa_circ_0029762 | PARP4             | 0.702208431 | 0.004106309 | hsa_circ_0000540 | FBXO34               | 2.016652728 | 0.001443648 |
| hsa_circ_0004293 | DDX6              | 0.70305384  | 0.009129947 | hsa_circ_0018814 | PPP3CB               | 2.065447402 | 0.00018038  |
| hsa_circ_0036399 | ETFA              | 0.705776899 | 0.003751905 | hsa_circ_0002522 | NPLOC4               | 2.082426772 | 0.005549216 |
| hsa_circ_0038885 | NFATC2IP          | 0.714635008 | 0.007116669 | hsa_circ_0025388 | A2ML1                | 2.087891058 | 0.009577732 |
| hsa_circ_0065049 | ZDHH3             | 0.715817748 | 0.003155859 | hsa_circ_0013587 | LRIG2                | 2.118278847 | 0.000834372 |
| hsa_circ_0002321 | PPP2R5A           | 0.723246862 | 0.001258486 | hsa_circ_0080822 | PION                 | 2.12098587  | 0.004654048 |
| hsa_circ_0045606 | NUP85             | 0.726298145 | 0.002207705 | hsa_circ_0002229 | LPIN1                | 2.136690111 | 0.000574086 |
| hsa_circ_0068629 | TFRC              | 0.727120604 | 0.000908917 | hsa_circ_0070391 | KLHL8                | 2.145248255 | 0.000675807 |
| hsa_circ_0087063 | GRHPR             | 0.727717135 | 0.00446881  | hsa_circ_0088072 | PTBP3                | 2.22139249  | 7.06421E-05 |
| hsa_circ_0002755 | CLIP2             | 0.728061481 | 0.008858404 | hsa_circ_0000305 | CELF1                | 2.226877771 | 0.00136067  |
| hsa_circ_0023202 | LRP5              | 0.729702774 | 0.006668076 | hsa_circ_0008659 | PTPN14               | 2.238423811 | 0.003643211 |
| hsa_circ_0003557 | ARAP1             | 0.734425862 | 0.004419498 | hsa_circ_0046702 | YES1                 | 2.261074675 | 0.000455443 |
| hsa_circ_0011279 | SERINC2           | 0.745472914 | 0.002317203 | hsa_circ_0041821 | NEURL4               | 2.261157883 | 0.002985089 |
| hsa_circ_0002094 | RBM33             | 0.748997548 | 0.004146139 | hsa_circ_0008334 | GRB10                | 2.274392673 | 0.008446395 |
| hsa_circ_0002476 | INTS4             | 0.7503637   | 0.000541901 | hsa_circ_0049657 | NFIX                 | 2.276287812 | 6.05556E-05 |
| hsa_circ_0074146 | HSPA9             | 0.7574538   | 0.009632353 | hsa_circ_0002069 | SNX11                | 2.301585859 | 0.005702859 |
| hsa_circ_0008926 | NUSAP1            | 0.761784652 | 0.00287245  | hsa_circ_0007875 | MTR                  | 2.308564423 | 0.00261977  |
| hsa_circ_0001563 | HNRNPH1           | 0.762256148 | 0.007127861 | hsa_circ_0068641 | TM4SF19-TCTEX1<br>D2 | 2.308908482 | 0.000424183 |
| hsa_circ_0083145 | UBE3C             | 0.76304426  | 0.009441671 | hsa_circ_0079534 | MACC1                | 2.320812506 | 0.001094722 |
| hsa_circ_0006387 | HERC3             | 0.767256614 | 0.001149576 | hsa_circ_0018736 | ASCC1                | 2.348385069 | 9.96231E-06 |
| hsa_circ_0003020 | TIMM23            | 0.76783598  | 0.004679073 | hsa_circ_0071185 | LRBA                 | 2.353244156 | 0.005029261 |
| hsa_circ_0028411 | <u>C12orf51</u>   | 0.769022787 | 0.009461043 | hsa_circ_0071196 | LRBA                 | 2.408958863 | 0.005388558 |
| hsa_circ_0014263 | ILF2              | 0.773716371 | 0.003924549 | hsa_circ_0003500 | PTBP3                | 2.442045616 | 0.008064486 |
| hsa_circ_0005175 | HPS4              | 0.775130619 | 1.93435E-05 | hsa_circ_0000670 | C16orf72             | 2.454828967 | 0.008830005 |
| hsa_circ_0007613 | PRRC2B            | 0.791580462 | 0.005254959 | hsa_circ_0020926 | STIM1                | 2.509742385 | 5.42504E-05 |
| hsa_circ_0001360 | PHC3              | 0.792043517 | 0.002737594 | hsa_circ_0070113 | FRAS1                | 2.524481531 | 0.000387788 |
| hsa_circ_0011450 | S100BPB           | 0.796780422 | 0.003498052 | hsa_circ_0085013 | LAPTM4B              | 2.569627904 | 0.004538885 |
| hsa_circ_0084727 | SLCO5A1           | 0.806147121 | 0.009509421 | hsa_circ_0004636 | LRBA                 | 2.587276284 | 0.003221041 |
| hsa_circ_0040766 | FBXO31            | 0.806405687 | 0.003967975 | hsa_circ_0000813 | RPTOR                | 2.641508505 | 0.001889797 |
| hsa_circ_0014877 | DCAF8             | 0.810787284 | 0.003212024 | hsa_circ_0000228 | ZEB1                 | 2.67171011  | 0.007178496 |
| hsa_circ_0043522 | WIPF2             | 0.815870632 | 0.006986909 | hsa_circ_0092364 | GTF3C5               | 2.679020667 | 0.000401208 |
| hsa_circ_0004722 | RFWD2             | 0.816653837 | 0.002444952 | hsa_circ_0001033 | TTC31                | 2.731038539 | 5.1448E-05  |
| hsa_circ_0029325 | SCARB1            | 0.818337185 | 0.003473066 | hsa_circ_0002404 | ACACA                | 2.742761144 | 0.004354313 |
| hsa_circ_0014063 | SETDB1            | 0.819293427 | 0.009705791 | hsa_circ_0071174 | LRBA                 | 2.771079351 | 0.003043664 |
| hsa_circ_0006262 | TCONS_12_00002184 | 0.820285017 | 0.003337108 | hsa_circ_0078383 | TIAM2                | 2.928473103 | 0.002941969 |
| hsa_circ_0079363 | DAGLB             | 0.838112957 | 0.006285947 | hsa_circ_0000714 | AARS                 | 2.951412535 | 0.000147617 |

|                  |           |             |             |                  |                |             |             |
|------------------|-----------|-------------|-------------|------------------|----------------|-------------|-------------|
| hsa_circ_0004401 | EDC3      | 0.844619694 | 0.005633338 | hsa_circ_0035381 | PIGB           | 2.984251894 | 0.002284791 |
| hsa_circ_0060744 | CSE1L     | 0.860793476 | 0.005137773 | hsa_circ_0041382 | SMG6           | 3.038041479 | 0.005575253 |
| hsa_circ_0024037 | MRE11A    | 1.139533638 | 0.004476213 | hsa_circ_0061749 | BRWD1          | 3.048182211 | 0.002590289 |
| hsa_circ_0028644 | VSIG10    | 1.144789742 | 0.00519768  | hsa_circ_0030777 | PCCA           | 3.217417989 | 8.75674E-05 |
| hsa_circ_0057037 | TLK1      | 1.149722781 | 0.000756574 | hsa_circ_0041392 | SMG6           | 3.384366323 | 0.000230851 |
| hsa_circ_0072099 | ZFR       | 1.155956298 | 0.001581397 | hsa_circ_0052318 | ZNF418         | 3.668146245 | 0.007604701 |
| hsa_circ_0001246 | ATXN10    | 1.160714888 | 0.001275603 | hsa_circ_0001936 | BRWD3          | 3.689173349 | 0.004472471 |
| hsa_circ_0005252 | C14orf118 | 1.16190218  | 0.008021227 | hsa_circ_0029976 | NBEA           | 3.72890095  | 1.0157E-05  |
| hsa_circ_0005164 | KAT6B     | 1.167384455 | 0.008763188 | hsa_circ_0087354 | UBQLN1         | 3.762648285 | 0.002659804 |
| hsa_circ_0065244 | SMARCC1   | 1.174552811 | 0.003914045 | hsa_circ_0019390 | C10orf28       | 3.914307985 | 7.50796E-05 |
| hsa_circ_0074736 | GEMIN5    | 1.175905958 | 0.002259347 | hsa_circ_0079480 | ISPD           | 3.915385822 | 0.000634619 |
| hsa_circ_0034557 | EIF2AK4   | 1.184575478 | 0.006203569 | hsa_circ_0030569 | ABCC4          | 3.966357033 | 0.007509168 |
| hsa_circ_0000508 | CUL4A     | 1.200095791 | 0.007956054 | hsa_circ_0007518 | NDUFB2         | 4.128170944 | 0.001685757 |
| hsa_circ_0042986 | SUZ12     | 1.203588025 | 0.008651612 | hsa_circ_0008537 | GLI3           | 4.346651214 | 0.006913173 |
| hsa_circ_0037777 | ALG1      | 1.209380744 | 0.009173936 | hsa_circ_0003239 | UBE2G1         | 4.776238061 | 0.001000669 |
| hsa_circ_0092297 | SMPD4     | 1.21025212  | 0.003433775 | hsa_circ_0054254 | EML4           | 5.061100909 | 0.000323844 |
| hsa_circ_0014437 | ADAR      | 1.215492453 | 0.00447965  | hsa_circ_0001644 | BCLAF1         | 5.097446693 | 7.98613E-05 |
| hsa_circ_0001818 | UBR5      | 1.220055158 | 0.005833225 | hsa_circ_0084984 | PTDSS1         | 5.150143357 | 1.74637E-06 |
| hsa_circ_0000034 | DHDDS     | 1.224279536 | 0.00730194  | hsa_circ_0000253 | BLNK           | 6.814382734 | 0.000689672 |
| hsa_circ_0001917 | CASK      | 1.232235829 | 0.007847749 | hsa_circ_0003162 | BBS9           | 7.771234597 | 0.003200577 |
| hsa_circ_0037858 | LITAF     | 1.233611425 | 0.004275605 | hsa_circ_0020390 | DOCK1          | 7.785532201 | 0.000265101 |
| hsa_circ_0010039 | CASP9     | 1.236111166 | 0.008818378 | hsa_circ_0006446 | LSM14A         | 8.356403503 | 5.0447E-05  |
| hsa_circ_0060848 | NFATC2    | 1.23704281  | 0.002504122 | hsa_circ_0015278 | KLHL20         | 8.692303634 | 0.004865838 |
| hsa_circ_0082326 | ZC3HC1    | 1.238637717 | 0.009714409 | hsa_circ_0061817 | C2CD2          | 9.002002531 | 4.24047E-06 |
| hsa_circ_0062808 | MTMR3     | 1.240213272 | 0.004460428 | hsa_circ_0041555 | UBE2G1         | 9.012117957 | 0.0003458   |
| hsa_circ_0079891 | ELMO1     | 1.241540134 | 0.00614927  | hsa_circ_0023685 | PAK1           | 9.558295891 | 2.08456E-05 |
| hsa_circ_0068606 | TFRC      | 1.245651466 | 0.0097915   | hsa_circ_0003568 | IST1           | 10.86170341 | 0.000500308 |
| hsa_circ_0006332 | MYBL2     | 1.247856983 | 0.006521208 | hsa_circ_0060828 | TMEM189-UBE2V1 | 12.42474028 | 0.000234212 |
| hsa_circ_0008614 | DHDDS     | 1.25459237  | 0.009852745 | hsa_circ_0004099 | DENND5A        | 12.95429795 | 0.004677225 |
| hsa_circ_0008826 | DHTKD1    | 1.254709984 | 0.001509824 | hsa_circ_0000086 | ST6GALNAC3     | 16.98479682 | 5.98987E-05 |
| hsa_circ_0086483 | ACER2     | 1.262480021 | 0.004030754 | hsa_circ_0078051 | AIG1           | 18.62737921 | 3.50363E-05 |
| hsa_circ_0032391 | PCNX      | 1.269701548 | 0.00175285  | hsa_circ_0011536 | ZMYM4          | 18.88807983 | 0.002448269 |
| hsa_circ_0003677 | FBXW8     | 1.272121139 | 0.009650318 | hsa_circ_0011929 | CTPS1          | 22.36633183 | 0.000779749 |
| hsa_circ_0008950 | PKN1      | 1.273645266 | 0.002144786 | hsa_circ_0049356 | CARM1          | 34.19307152 | 4.56276E-06 |
| hsa_circ_0028123 | ACACB     | 1.279643042 | 0.003024823 | hsa_circ_0000370 | FLI1           | 45.97041311 | 4.69948E-06 |
| hsa_circ_0001292 | SCAP      | 1.281771396 | 5.95627E-06 |                  |                |             |             |

**Supplemental Table 3. The 28 circRNAs whose parental genes are reported to have association with leukemia progression.**

| circRNA ID       | Parental Gene |
|------------------|---------------|------------------|---------------|------------------|---------------|------------------|---------------|
| hsa_circ_0000370 | FLI1          | hsa_circ_0030569 | ABCC4         | hsa_circ_0043947 | BRCA1         | hsa_circ_0020545 | INPP5A        |
| hsa_circ_0049356 | CARM1         | hsa_circ_0035381 | PIGB          | hsa_circ_0002037 | XPO5          | hsa_circ_0001947 | AFF2          |
| hsa_circ_0023685 | PAK1          | hsa_circ_0002404 | ACACA         | hsa_circ_0006332 | MYBL2         | hsa_circ_0043138 | TAF15         |
| hsa_circ_0020390 | DOCK1         | hsa_circ_0000228 | ZEB1          | hsa_circ_0042986 | SUZ12         | hsa_circ_0040921 | ANKRD11       |
| hsa_circ_0000253 | BLNK          | hsa_circ_0008334 | GRB10         | hsa_circ_0002768 | MYLK          | hsa_circ_0005442 | CRIM1         |
| hsa_circ_0001644 | BCLAF1        | hsa_circ_0088072 | PTBP3         | hsa_circ_0031288 | PABPN1        | hsa_circ_0002891 | PDIA3         |
| hsa_circ_0008537 | GLI3          | hsa_circ_0003578 | CRIM1         | hsa_circ_0005795 | LPXN          | hsa_circ_0074269 | ANKHD1        |

**Supplemental Table 4. The sequences of siRNAs and sh-RNAs.**

| Name           | Sense sequence(5'-3')                                           | Antisense sequence(5'-3')                                       |
|----------------|-----------------------------------------------------------------|-----------------------------------------------------------------|
| si-circMYBL2-1 | CAUGCUGCGACCCUGAUGCtt                                           | GCAUCAGGGUCGCAGCAUGtt                                           |
| si-circMYBL2-2 | UGCUGCGACCCUGAUGCUUtt                                           | AAGCAUCAGGGUCGCAGCAtt                                           |
| si-PTBP1-1     | GCGUGAAGAUCUGUUCAAtt                                            | UUGAACAGGAUCUUCACGCtt                                           |
| si-PTBP1-2     | GCAUCACGCUCUCGAAGCAtt                                           | UGCUUCGAGAGCGUGAUGCtt                                           |
| sh-circMYBL2   | gatccCATGCTGCGACCCTGATGCcttcgtcag<br>aGCATCAGGGTCGCAGCATGtttttg | aattcaaaaaCATGCTGCGACCCTGATGCtctgac<br>gaagGCATCAGGGTCGCAGCATGg |
| sh-PTBP1       | gatccGCATCACGCTCTCGAAGCActtcgta<br>gaTGCTTCGAGAGCGTGATGCtttttg  | aattcaaaaaGCATCACGCTCTCGAAGCAtctgac<br>gaagTGCTTCGAGAGCGTGATGCg |

**Supplemental Table 5. Primers for quantifying target genes and constructing expression vectors.**

| Name                  | Forward Primer                                            | Reverse Primer                                                     |
|-----------------------|-----------------------------------------------------------|--------------------------------------------------------------------|
| qFLT3                 | TTTACCCCACTTTCCAATCACAT                                   | CGAGTCCGGGTGTATCTGAAC                                              |
| qcircMYBL2            | TGTTAAGACCCTGCCCTTCTC                                     | CAGGACTTGCTGCTGATGTGAC                                             |
| qGAPDH                | GAGAGACCCTCACTGCTG                                        | GATGGTACATGACAAGGTGC                                               |
| qU6                   | CGCTTCGGCAGCACATATAC                                      | TTCACGAATTTGCGTGTGTCAT                                             |
| qActin                | CATGTACGTTGCTATCCAGGC                                     | CTCCTTAATGTCACGCACGAT                                              |
| qPTBP1                | ATGGACGGCATTGTCCCAGATATAG                                 | CTAGATGGTGGACTTGGAGAAGGAGA                                         |
| qMTOC1                | CTTAGGGGCCATCAATTTCA                                      | GCAGCTAGGACTGGGAGAGA                                               |
| qMALAT1               | GCTTGAGAAGATGAGGGTGTTT                                    | TCCAAAAGCCTTCTGCCTTA                                               |
| Intron-1              | GGAGGCAGGG TATCTCCATG                                     | CTAGGTAATAGGAAACAAAATCCAAACA<br>TGATCT                             |
| Intron-2              | GTAAGTAGTCAACAAAATTCATCAATA<br>TTATTTCTCTCT               | ACAAAAAGAGTTTTAAAAATGTTAAAAT<br>TGAATACAGAT                        |
| Intron-3              | GCGGCCGCAATGGTC ACTTAAAAAA<br>TTTGTAGTCA GCc              | GCGGCCGCCCTCAGGTGATCTGCCACet                                       |
| 8-9 exons of<br>MYBL2 | ATCATGTTTGGATTTTGTTCCTATTACC<br>TAGGACCCTGATGCTTGGTGTGACC | GAGAGAAATAATATTGATGAATTTTGTG<br>ACTACTTACGCAGCATGTTTCTGGTGCAG<br>G |



**Supplemental Table 6. The genes whose translational efficiency were changed upon circMYBL2 knockdown.**

| Gene    | Ribosome/Input  |                        | sh-circMYBL2<br>2 vs sh-NC | P Value     | Gene     | Ribosome/Input  |                        | sh-circMYBL2<br>vs sh-NC | P Value     |
|---------|-----------------|------------------------|----------------------------|-------------|----------|-----------------|------------------------|--------------------------|-------------|
|         | sh-NC<br>(mean) | sh-circMYBL2<br>(mean) |                            |             |          | sh-NC<br>(mean) | sh-circMYBL2<br>(mean) |                          |             |
| TBC1D20 | 0.894635065     | 0                      | 0                          | 1.96E-07    | SGO1     | 4.73427373      | 0                      | 0                        | 0.039818335 |
| PDLIM5  | 1.565919483     | 0                      | 0                          | 1.35E-06    | LIN52    | 0.506360909     | 0                      | 0                        | 0.040407187 |
| GOLGA8R | 0.18987169      | 0                      | 0                          | 4.56E-06    | NUBPL    | 0.198238227     | 0                      | 0                        | 0.040450678 |
| GPATCH2 | 0.255451448     | 0                      | 0                          | 7.52E-06    | RSAD2    | 3.268535086     | 0                      | 0                        | 0.041040444 |
| ZNF717  | 0.324151168     | 0                      | 0                          | 9.63E-06    | C8orf37  | 0.601953808     | 0                      | 0                        | 0.041290385 |
| GOLGA1  | 0.198992394     | 0                      | 0                          | 1.02E-05    | PRDM11   | 1.769000895     | 0                      | 0                        | 0.041407969 |
| BTBD6   | 8.137741579     | 0                      | 0                          | 1.02E-05    | ARMC10   | 0.522515368     | 0                      | 0                        | 0.041425353 |
| GAS2L1  | 25.769515       | 0                      | 0                          | 1.02E-05    | ZNF517   | 2.23327381      | 0                      | 0                        | 0.04165966  |
| CDCA3   | 4.685366364     | 0                      | 0                          | 1.02E-05    | ZNF17    | 0.286617266     | 0                      | 0                        | 0.041795784 |
| FBXO6   | 4.685366364     | 0                      | 0                          | 1.02E-05    | CYB561D1 | 1.609790124     | 0                      | 0                        | 0.042124852 |
| PPP1R3G | 1.840679643     | 0                      | 0                          | 1.02E-05    | SPIRE1   | 1.950137474     | 0                      | 0                        | 0.042724835 |
| AATK    | 12.8847575      | 0                      | 0                          | 1.02E-05    | NEIL3    | 1.298505249     | 0                      | 0                        | 0.042853388 |
| BIRC2   | 0.302881449     | 0                      | 0                          | 1.35E-05    | RUSC1    | 10.57657539     | 0                      | 0                        | 0.04300495  |
| LGALS3  | 0.277391101     | 0                      | 0                          | 1.82E-05    | RGS12    | 0.57944931      | 0                      | 0                        | 0.043075108 |
| SPOUT1  | 0.835960732     | 0                      | 0                          | 2.24E-05    | ZNF641   | 0.392869547     | 0                      | 0                        | 0.043084232 |
| NME4    | 5.869480504     | 0                      | 0                          | 2.87E-05    | XIAP     | 0.682150815     | 0                      | 0                        | 0.043433139 |
| CYP4V2  | 0.199960987     | 0                      | 0                          | 3.72E-05    | TSR2     | 0.317907128     | 0                      | 0                        | 0.04344394  |
| RNF31   | 1.049025502     | 0                      | 0                          | 3.98E-05    | SLC2A4RG | 6.256987898     | 0                      | 0                        | 0.043781611 |
| KLHL29  | 2.832057657     | 0                      | 0                          | 6.09E-05    | STK17A   | 0.547988455     | 0                      | 0                        | 0.043837672 |
| SLC12A2 | 2.466076355     | 0                      | 0                          | 6.35E-05    | GOLGA8N  | 0.037960956     | 0                      | 0                        | 0.043930776 |
| NIPAL3  | 0.827346577     | 0                      | 0                          | 6.48E-05    | TMEM121B | 3.701863111     | 0                      | 0                        | 0.04414685  |
| KATNB1  | 0.22832637      | 0                      | 0                          | 8.09E-05    | FAM89A   | 0.899586289     | 0                      | 0                        | 0.044262387 |
| POLR2J  | 0.184418805     | 0                      | 0                          | 8.71E-05    | EXO5     | 0.337395243     | 0                      | 0                        | 0.044441326 |
| SCLT1   | 0.20984172      | 0                      | 0                          | 9.61E-05    | KCNA3    | 7.441378345     | 0                      | 0                        | 0.044513873 |
| ZNF2    | 0.833630924     | 0                      | 0                          | 0.00010588  | TNFSF4   | 2.480459448     | 0                      | 0                        | 0.044513873 |
| TBXAS1  | 0.411976189     | 0                      | 0                          | 0.000105897 | PCCA     | 0.425793477     | 0                      | 0                        | 0.044670941 |
| DUSP5   | 3.581158937     | 0                      | 0                          | 0.000112995 | C5orf42  | 2.03056755      | 0                      | 0                        | 0.044883845 |
| TRIM66  | 0.20499541      | 0                      | 0                          | 0.000115178 | PMFBP1   | 0.54007258      | 0                      | 0                        | 0.044979187 |
| GNA11   | 4.155436949     | 0                      | 0                          | 0.000119631 | ZNF430   | 0.135214474     | 0                      | 0                        | 0.045076515 |
| ARID3B  | 0.665935409     | 0                      | 0                          | 0.000119631 | PCSK7    | 0.310560519     | 0                      | 0                        | 0.045130541 |
| RMDN2   | 0.341801067     | 0                      | 0                          | 0.000124169 | GSTZ1    | 0.601126122     | 0                      | 0                        | 0.045499538 |
| ACOT8   | 1.069570704     | 0                      | 0                          | 0.000125928 | WDR35    | 0.276413968     | 0                      | 0                        | 0.04569864  |
| CD55    | 0.212471742     | 0                      | 0                          | 0.000136816 | TLDC1    | 1.106844617     | 0                      | 0                        | 0.045708662 |
| ZNF33B  | 0.094429183     | 0                      | 0                          | 0.000136988 | ANKRD39  | 2.213689235     | 0                      | 0                        | 0.045708662 |
| TAF4B   | 0.594170636     | 0                      | 0                          | 0.000139969 | PRELID3B | 0.529280628     | 0                      | 0                        | 0.045880615 |
| PARPB   | 1.55869679      | 0                      | 0                          | 0.000142354 | PSMC6    | 0.220939918     | 0                      | 0                        | 0.046371867 |
| CSTB    | 0.147073169     | 0                      | 0                          | 0.000156353 | ZFP36L1  | 1.431655729     | 0                      | 0                        | 0.046437081 |
| PPP1R26 | 1.267627653     | 0                      | 0                          | 0.000174386 | ZSCAN32  | 0.675159343     | 0                      | 0                        | 0.046512535 |
| PDCD5   | 0.233413908     | 0                      | 0                          | 0.000192643 | MKS1     | 0.483187888     | 0                      | 0                        | 0.046654109 |
| RAB3IP  | 1.150726248     | 0                      | 0                          | 0.000215171 | KYNU     | 0.674305113     | 0                      | 0                        | 0.046660129 |
| PRKAR1B | 2.970389716     | 0                      | 0                          | 0.000302288 | CTTN     | 0.411415183     | 0                      | 0                        | 0.046786324 |
| VEGFA   | 0.062088889     | 0                      | 0                          | 0.00031941  | ERICH1   | 0.048747197     | 0                      | 0                        | 0.046884795 |
| TRIM9   | 2.610557608     | 0                      | 0                          | 0.000320662 | INPP5F   | 0.398608562     | 0                      | 0                        | 0.046908779 |
| ANKRA2  | 0.405940174     | 0                      | 0                          | 0.000358303 | KATNB1   | 3.683966418     | 0                      | 0                        | 0.047175917 |
| LIG4    | 0.459491546     | 0                      | 0                          | 0.000359353 | ALKBH4   | 2.009436228     | 0                      | 0                        | 0.047175917 |
| SMIM29  | 1.690346817     | 0                      | 0                          | 0.000383129 | TYW1     | 0.181572559     | 0                      | 0                        | 0.047418986 |
| FBXO43  | 1.027694043     | 0                      | 0                          | 0.000391696 | SLC25A43 | 0.260312887     | 0                      | 0                        | 0.047487383 |
| NMNAT1  | 0.816909527     | 0                      | 0                          | 0.000392789 | COPS9    | 1.034613803     | 0                      | 0                        | 0.047497622 |
| TRIP4   | 0.239966024     | 0                      | 0                          | 0.000406758 | DHRS13   | 7.378191422     | 0                      | 0                        | 0.047596432 |
| MRPS33  | 0.225142487     | 0                      | 0                          | 0.000426273 | UIMC1    | 0.573857829     | 0                      | 0                        | 0.047614752 |
| RPS15A  | 0.006578013     | 0                      | 0                          | 0.000437566 | CEBPZOS  | 0.603146298     | 0                      | 0                        | 0.047688773 |
| PRIM1   | 3.532561732     | 0                      | 0                          | 0.000446187 | SCARB2   | 0.671021815     | 0                      | 0                        | 0.047721449 |
| KATNAL2 | 0.196444118     | 0                      | 0                          | 0.00046523  | TM7SF2   | 0.763584166     | 0                      | 0                        | 0.047724469 |
| GALNT11 | 0.387681958     | 0                      | 0                          | 0.000483147 | ALOX5    | 0.651604784     | 0                      | 0                        | 0.047869697 |

|            |             |   |   |             |           |             |             |             |             |
|------------|-------------|---|---|-------------|-----------|-------------|-------------|-------------|-------------|
| FOXRED1    | 1.258342448 | 0 | 0 | 0.000488032 | PGRMC1    | 1.943654043 | 0           | 0           | 0.047911998 |
| LPAR6      | 0.528909979 | 0 | 0 | 0.000503889 | ZNF70     | 0.379982868 | 0           | 0           | 0.048021559 |
| SAV1       | 0.909513629 | 0 | 0 | 0.000571451 | ARID5B    | 2.092233256 | 0           | 0           | 0.048154164 |
| PEX6       | 0.511402001 | 0 | 0 | 0.000608192 | CDK14     | 0.39852062  | 0           | 0           | 0.048154165 |
| VPS8       | 0.446067201 | 0 | 0 | 0.000631425 | CREBZF    | 0.474656372 | 0           | 0           | 0.048537413 |
| UBR3       | 0.720229771 | 0 | 0 | 0.000651218 | SLC38A9   | 0.297941713 | 0           | 0           | 0.048541307 |
| RAP2C      | 0.652858175 | 0 | 0 | 0.000655122 | NSUN3     | 0.312012126 | 0           | 0           | 0.048557844 |
| STARD4     | 1.392458867 | 0 | 0 | 0.00068738  | 8-Mar     | 1.180309575 | 0           | 0           | 0.048868436 |
| SMIM14     | 0.588049677 | 0 | 0 | 0.000705601 | SPRTN     | 1.730791255 | 0           | 0           | 0.049443259 |
| GFER       | 2.030381376 | 0 | 0 | 0.000717837 | STARD3NL  | 0.57269999  | 0           | 0           | 0.04947275  |
| MAPK3      | 4.286585965 | 0 | 0 | 0.000743732 | COO10B    | 0.136250372 | 0           | 0           | 0.049856227 |
| TMEM167A   | 0.288529431 | 0 | 0 | 0.000750897 | NPC2      | 0.598510874 | 0           | 0           | 0.049882465 |
| PADI2      | 2.515791047 | 0 | 0 | 0.000759514 | EEF1AKMT2 | 0.497525497 | 0           | 0           | 0.049939614 |
| EMP1       | 3.328220168 | 0 | 0 | 0.000844237 | NXT2      | 4.664165965 | 0.129090382 | 0.027677056 | 0.020722856 |
| KYAT1      | 3.328220168 | 0 | 0 | 0.000844237 | USP33     | 0.889955019 | 0.030486661 | 0.034256407 | 0.003844061 |
| FOXA1      | 9.984660504 | 0 | 0 | 0.000844237 | MPHOSPH9  | 0.874520667 | 0.030391908 | 0.034752647 | 0.011192438 |
| TMEM143    | 14.26380072 | 0 | 0 | 0.000844237 | SP3       | 0.949792993 | 0.033035799 | 0.034782104 | 0.015894988 |
| SAT1       | 0.031814857 | 0 | 0 | 0.000851175 | ZFX       | 0.794987342 | 0.029038148 | 0.036526554 | 0.006313763 |
| ZNF490     | 0.270045424 | 0 | 0 | 0.00086104  | MXD1      | 1.182923196 | 0.048589299 | 0.041075616 | 0.013361269 |
| DTD2       | 0.186914962 | 0 | 0 | 0.0008647   | HSDL2     | 0.99568883  | 0.043899423 | 0.0440895   | 0.018463111 |
| STAM       | 0.440303359 | 0 | 0 | 0.000871065 | POP1      | 1.169834611 | 0.052928803 | 0.045244689 | 0.005001058 |
| SEC61G     | 0.073527062 | 0 | 0 | 0.000872442 | RNPEPL1   | 10.17811468 | 0.477004703 | 0.046865723 | 0.006670449 |
| C18orf54   | 2.165648615 | 0 | 0 | 0.000985549 | RNF138    | 0.846499253 | 0.040533042 | 0.04788314  | 0.023687868 |
| SUGP1      | 0.492652741 | 0 | 0 | 0.000986831 | DCTN1     | 0.631883128 | 0.031216589 | 0.049402473 | 0.047569996 |
| RAD54B     | 0.881440015 | 0 | 0 | 0.000996683 | PPP2R5C   | 0.757759827 | 0.040978927 | 0.054079044 | 0.031583276 |
| IER3       | 0.083828187 | 0 | 0 | 0.001006389 | KIF15     | 2.813251078 | 0.157085886 | 0.055837848 | 0.009538481 |
| ZNF107     | 0.101776257 | 0 | 0 | 0.001085733 | C5orf22   | 1.545417144 | 0.088494085 | 0.057262264 | 0.005754565 |
| ZNF431     | 0.064366669 | 0 | 0 | 0.001086668 | KCTD3     | 1.880635011 | 0.108200237 | 0.057533884 | 0.005379395 |
| F3         | 0.848068549 | 0 | 0 | 0.001108422 | FCHSD2    | 1.23275811  | 0.073385339 | 0.059529391 | 0.039943778 |
| C2orf49    | 0.28425004  | 0 | 0 | 0.001119476 | GCNT1     | 1.060131224 | 0.063394466 | 0.059798697 | 0.018383034 |
| NUBP1      | 0.690338854 | 0 | 0 | 0.001127477 | RRM2      | 22.26212745 | 1.334499259 | 0.059944822 | 0.020472172 |
| COA5       | 0.142752046 | 0 | 0 | 0.001164974 | STAU2     | 0.942295589 | 0.059534834 | 0.063180635 | 0.004682995 |
| KCNO3      | 0.787907526 | 0 | 0 | 0.001221729 | GNB5      | 4.367270675 | 0.279388469 | 0.063973243 | 0.037232255 |
| C1orf35    | 0.985922144 | 0 | 0 | 0.00122488  | DTD1      | 0.96946963  | 0.062884864 | 0.064865223 | 0.006493389 |
| UPRT       | 0.616996765 | 0 | 0 | 0.001260017 | GALNT7    | 0.651205198 | 0.042285822 | 0.064934712 | 0.010910892 |
| MAP3K7     | 0.867829004 | 0 | 0 | 0.001295523 | TRIM22    | 0.266294293 | 0.017314912 | 0.065021716 | 0.026455654 |
| PFKM       | 3.196039065 | 0 | 0 | 0.00137103  | NFATC2IP  | 0.957554848 | 0.06238339  | 0.065148634 | 0.030836865 |
| PIP5K1A    | 0.557443846 | 0 | 0 | 0.001401746 | CEP295    | 0.47201733  | 0.031043163 | 0.065766998 | 0.007471735 |
| DDX10      | 0.114108358 | 0 | 0 | 0.001440099 | DSN1      | 8.482384295 | 0.558787703 | 0.065876254 | 0.026684451 |
| CYP2R1     | 0.294553953 | 0 | 0 | 0.001455112 | TRAK2     | 0.742091269 | 0.051331215 | 0.069171027 | 0.010249586 |
| NUDT6      | 0.259340026 | 0 | 0 | 0.001468133 | RASAL2    | 0.871784097 | 0.060642458 | 0.069561326 | 0.047922864 |
| SLC15A2    | 0.146247217 | 0 | 0 | 0.001541809 | EIF1AX    | 0.247831282 | 0.017836017 | 0.071968385 | 0.00793703  |
| MBOAT1     | 2.471434603 | 0 | 0 | 0.001546531 | SH3BGRL   | 0.313268242 | 0.022557316 | 0.072006393 | 0.006081538 |
| TM2D3      | 0.400139913 | 0 | 0 | 0.001553545 | N4BP1     | 1.212896401 | 0.089711894 | 0.07396501  | 0.006574915 |
| DYM        | 0.85294832  | 0 | 0 | 0.001577372 | POLC1     | 4.110014801 | 0.315438594 | 0.076748773 | 0.015415559 |
| L2HGDH     | 2.154629276 | 0 | 0 | 0.001583668 | FANCC     | 8.182165351 | 0.630877188 | 0.07710394  | 0.024944325 |
| CREG1      | 0.957653195 | 0 | 0 | 0.001605862 | ENOPH1    | 0.691229539 | 0.05365485  | 0.077622334 | 0.019979817 |
| MAP3K6     | 4.489520609 | 0 | 0 | 0.0016199   | WDR89     | 1.278589217 | 0.099527699 | 0.07784181  | 0.048677809 |
| LYRM2      | 0.265082611 | 0 | 0 | 0.001642097 | BRD9      | 0.5063406   | 0.039912638 | 0.078825672 | 0.041627901 |
| RPP38      | 0.645222211 | 0 | 0 | 0.00165093  | VRK1      | 0.472636345 | 0.037322887 | 0.07896745  | 0.019955016 |
| TMCO6      | 1.541349224 | 0 | 0 | 0.00172568  | KMT5B     | 0.333602983 | 0.026464402 | 0.079329033 | 0.02472703  |
| ELOVL6     | 1.2969753   | 0 | 0 | 0.001792982 | C5orf51   | 0.915135141 | 0.073523281 | 0.080341447 | 0.014379454 |
| CDKN2AIPNL | 0.158896784 | 0 | 0 | 0.001841602 | SUPV3L1   | 0.907107171 | 0.074503592 | 0.082133175 | 0.014353442 |
| PLCXD1     | 4.238947366 | 0 | 0 | 0.001859433 | SPTSSA    | 1.049410827 | 0.087114445 | 0.083012718 | 0.01435866  |
| ORC2       | 0.630298381 | 0 | 0 | 0.001893387 | EDC4      | 4.900270915 | 0.422858223 | 0.086292826 | 0.013662041 |
| PANK1      | 0.75658737  | 0 | 0 | 0.001896898 | RDX       | 0.350630773 | 0.030391908 | 0.086677811 | 0.023434314 |
| UOCR10     | 0.068026178 | 0 | 0 | 0.001932529 | KIF16B    | 0.477517757 | 0.041566829 | 0.087047714 | 0.015908564 |
| CCDC174    | 0.21363598  | 0 | 0 | 0.001970652 | MAP3K5    | 0.826711657 | 0.072166763 | 0.087293753 | 0.012323689 |
| PRKCE      | 0.600743439 | 0 | 0 | 0.001972983 | ANKS1A    | 0.957534073 | 0.084298245 | 0.08803681  | 0.014564032 |
| BTBD10     | 0.310524714 | 0 | 0 | 0.002011379 | CGGBP1    | 1.527611741 | 0.134877192 | 0.088292848 | 0.013295542 |
| PPP1R12A   | 0.373618377 | 0 | 0 | 0.002087393 | TTC17     | 0.209985665 | 0.018601619 | 0.088585185 | 0.009615525 |

|          |             |   |   |             |          |             |             |             |             |
|----------|-------------|---|---|-------------|----------|-------------|-------------|-------------|-------------|
| TOMM7    | 0.054384822 | 0 | 0 | 0.002120957 | CTNNAL1  | 8.126806443 | 0.724340475 | 0.089129781 | 0.020260977 |
| CHCHD7   | 0.176541647 | 0 | 0 | 0.002123874 | CEP152   | 0.28162075  | 0.025218817 | 0.08954886  | 0.013960044 |
| CNIH4    | 0.494180528 | 0 | 0 | 0.002131557 | MAN1A2   | 0.759007104 | 0.068581623 | 0.090357024 | 0.01100236  |
| PRDX4    | 2.144045746 | 0 | 0 | 0.002137209 | SAMD9    | 0.447287034 | 0.041173038 | 0.092050596 | 0.010888295 |
| SLC8B1   | 0.640387244 | 0 | 0 | 0.002146698 | PHAX     | 0.763601108 | 0.071507104 | 0.093644579 | 0.010639395 |
| RAB3GAP1 | 0.325498374 | 0 | 0 | 0.002233619 | RGP1     | 1.12332242  | 0.105429611 | 0.093855165 | 0.01575607  |
| NXPE3    | 1.732382023 | 0 | 0 | 0.002272943 | SLC35A2  | 4.268577537 | 0.411730375 | 0.096456108 | 0.043733543 |
| BTN2A2   | 0.810430332 | 0 | 0 | 0.002277159 | NPRL2    | 0.990091626 | 0.097058029 | 0.09802934  | 0.013974393 |
| CAPN7    | 0.595453556 | 0 | 0 | 0.002288047 | FGL2     | 0.645845999 | 0.065471234 | 0.101372826 | 0.013318381 |
| HHLA2    | 2.569648629 | 0 | 0 | 0.002291891 | PPIL1    | 1.2239462   | 0.124172653 | 0.101452705 | 0.02330515  |
| FBXO3    | 0.499669849 | 0 | 0 | 0.002294786 | HIST1H1D | 2.660536197 | 0.271627678 | 0.102095088 | 0.015589606 |
| INTS12   | 0.431854857 | 0 | 0 | 0.002308746 | NCS1     | 6.374260416 | 0.651906428 | 0.102271697 | 0.044826196 |
| FCHSD1   | 1.201358693 | 0 | 0 | 0.002460103 | ANKRD12  | 0.333155997 | 0.034614501 | 0.103898778 | 0.023761854 |
| ATG12    | 0.248949388 | 0 | 0 | 0.002500328 | GLRX5    | 1.026821022 | 0.108500376 | 0.105666298 | 0.020686562 |
| COG2     | 0.684831826 | 0 | 0 | 0.002530905 | SKA1     | 5.595002567 | 0.592642207 | 0.105923492 | 0.016746789 |
| GPX7     | 0.698393997 | 0 | 0 | 0.002578354 | FAM53B   | 2.621134175 | 0.279388469 | 0.106590678 | 0.01445894  |
| TMCO4    | 1.21227913  | 0 | 0 | 0.00261359  | RNF115   | 0.34040931  | 0.036589697 | 0.107487357 | 0.044733932 |
| KIAA1191 | 0.754075472 | 0 | 0 | 0.002855208 | RHOT1    | 0.363806721 | 0.039192771 | 0.107729651 | 0.037753702 |
| ATOX1    | 0.348152315 | 0 | 0 | 0.002911484 | UBL4A    | 5.299126358 | 0.575211554 | 0.108548375 | 0.017280187 |
| FAM160B1 | 0.871681876 | 0 | 0 | 0.002954711 | REL      | 1.058497506 | 0.117108939 | 0.110636953 | 0.040069384 |
| SUV39H2  | 0.688241666 | 0 | 0 | 0.003023185 | CDC6     | 3.43519422  | 0.380195637 | 0.110676606 | 0.01765646  |
| IPO4     | 20.4042879  | 0 | 0 | 0.00310018  | PAPD5    | 0.735775631 | 0.081488303 | 0.110751566 | 0.032162157 |
| MAIP1    | 2.447071436 | 0 | 0 | 0.003169411 | ZC3H14   | 0.387530158 | 0.043125012 | 0.111281693 | 0.017477878 |
| LNX2     | 1.251736527 | 0 | 0 | 0.003175612 | NUDT3    | 1.728549085 | 0.196116697 | 0.113457407 | 0.024790252 |
| CLCN5    | 1.66525221  | 0 | 0 | 0.003181842 | DEPDC1B  | 16.7290207  | 1.908018813 | 0.114054424 | 0.017277869 |
| ZDHHC4   | 0.849045292 | 0 | 0 | 0.003224641 | GPATCH2L | 0.540495344 | 0.061787443 | 0.114316328 | 0.000330331 |
| IOSEC2   | 1.869282449 | 0 | 0 | 0.003240597 | RNF139   | 0.945855428 | 0.108953721 | 0.115190671 | 0.023782508 |
| ZNF589   | 0.21150738  | 0 | 0 | 0.003269004 | STX12    | 1.672096767 | 0.192681703 | 0.115233584 | 0.02569212  |
| MTFMT    | 0.932034497 | 0 | 0 | 0.003319468 | SLC27A2  | 0.917716887 | 0.106578708 | 0.116134627 | 0.016829927 |
| TMEM14B  | 0.075414013 | 0 | 0 | 0.00332656  | MBLAC2   | 0.951747918 | 0.110805625 | 0.116423291 | 0.027078361 |
| MAPRE2   | 2.466022649 | 0 | 0 | 0.003392411 | PPFIA1   | 0.283330964 | 0.033260532 | 0.117391095 | 0.020448322 |
| CNOT4    | 0.485323399 | 0 | 0 | 0.003412658 | ATP6V0A2 | 0.718987364 | 0.084754899 | 0.11788093  | 0.024853137 |
| HIST1H4K | 2.658414028 | 0 | 0 | 0.003453974 | KIF18A   | 1.329416345 | 0.157719297 | 0.118638    | 0.019576883 |
| ASPHD2   | 1.284715491 | 0 | 0 | 0.003471925 | CUL9     | 0.54884384  | 0.065518234 | 0.119375001 | 0.01802825  |
| PTCD1    | 2.424883031 | 0 | 0 | 0.003500975 | SLC25A30 | 0.791247268 | 0.094937829 | 0.119985032 | 0.018169446 |
| ZNF266   | 0.505596527 | 0 | 0 | 0.0035173   | C17orf80 | 0.676848411 | 0.081318889 | 0.120143429 | 0.038193904 |
| ZSCAN30  | 0.116255086 | 0 | 0 | 0.003550636 | OTULIN   | 1.373949366 | 0.165272052 | 0.120289769 | 0.020689742 |
| PIK3R3   | 1.681817092 | 0 | 0 | 0.00359096  | ZWILCH   | 2.953546901 | 0.356020857 | 0.120540106 | 0.034208321 |
| ATP23    | 0.382970041 | 0 | 0 | 0.003611259 | CCDC88B  | 0.614093356 | 0.074220846 | 0.12086248  | 0.023625409 |
| FAM120B  | 0.119952384 | 0 | 0 | 0.003622175 | VAT1L    | 5.106090523 | 0.617595563 | 0.120952725 | 0.037019985 |
| GMFB     | 1.658879443 | 0 | 0 | 0.003694052 | COX6B1   | 0.296910531 | 0.036050125 | 0.121417468 | 0.024980286 |
| LRRC28   | 0.353214838 | 0 | 0 | 0.003781906 | NFIX     | 2.926414709 | 0.355585324 | 0.121508863 | 0.031459833 |
| FAR2     | 2.235529998 | 0 | 0 | 0.003821829 | AIMP2    | 0.761261004 | 0.094024966 | 0.123512127 | 0.04201254  |
| DHRS7B   | 2.434243776 | 0 | 0 | 0.003821829 | RNF213   | 0.50200889  | 0.062185033 | 0.123872374 | 0.020027879 |
| TMEM187  | 4.56420708  | 0 | 0 | 0.003821829 | FOXN2    | 1.622881912 | 0.202455412 | 0.124750551 | 0.032824941 |
| PMAIP1   | 0.220700578 | 0 | 0 | 0.003936124 | FYCO1    | 0.47757643  | 0.060455001 | 0.12658707  | 0.021961814 |
| SUMO2    | 0.260885178 | 0 | 0 | 0.003984124 | LEMD3    | 1.259927115 | 0.159650554 | 0.126714119 | 0.047658145 |
| FAM109A  | 9.661515008 | 0 | 0 | 0.004007179 | GGA3     | 1.320115982 | 0.167513429 | 0.126892963 | 0.047751217 |
| NFE4     | 0.11358403  | 0 | 0 | 0.004014034 | SERINC5  | 0.920669573 | 0.118708302 | 0.128936923 | 0.032486404 |
| CLN5     | 0.486835827 | 0 | 0 | 0.004077806 | PHF6     | 1.389434439 | 0.182981798 | 0.131695165 | 0.000553378 |
| ERCC6L   | 9.050705978 | 0 | 0 | 0.004110498 | UGCG     | 2.032117091 | 0.268827393 | 0.132289322 | 0.042747154 |
| TET1     | 0.963585329 | 0 | 0 | 0.004150631 | GUF1     | 1.144682789 | 0.152196053 | 0.132959152 | 0.027010311 |
| SMYD2    | 0.894793868 | 0 | 0 | 0.004185431 | ZSCAN29  | 0.608037276 | 0.080898419 | 0.133048453 | 0.031114233 |
| PNPLA2   | 2.537822943 | 0 | 0 | 0.004257002 | TK1      | 121.4002138 | 16.17564764 | 0.133242332 | 0.025565805 |
| IGF2BP3  | 0.218259129 | 0 | 0 | 0.004418945 | SPATA13  | 2.588610367 | 0.346145006 | 0.133718465 | 0.023252963 |
| MPPE1    | 0.642103633 | 0 | 0 | 0.004432782 | RSPRY1   | 0.949109069 | 0.127650443 | 0.13449502  | 0.038610618 |
| ZBED6CL  | 1.37660634  | 0 | 0 | 0.004459401 | H2AFV    | 1.450546536 | 0.196357358 | 0.135367845 | 0.023807363 |
| SDHAF3   | 0.381145691 | 0 | 0 | 0.004484744 | 8-Sep    | 3.121850947 | 0.425156366 | 0.136187273 | 0.029761101 |
| SUPT4H1  | 0.310032428 | 0 | 0 | 0.004500195 | HEATR5B  | 0.479851294 | 0.065518234 | 0.136538621 | 0.024107201 |
| ZNF286B  | 0.282998417 | 0 | 0 | 0.004574313 | RAD51C   | 0.542317856 | 0.074080276 | 0.136599367 | 0.046648744 |
| LUC7L    | 0.219238646 | 0 | 0 | 0.004627073 | ATXN7L1  | 0.413715769 | 0.056852305 | 0.137418753 | 0.030599226 |

|          |             |   |   |             |          |             |             |             |             |
|----------|-------------|---|---|-------------|----------|-------------|-------------|-------------|-------------|
| FAM172A  | 0.345704038 | 0 | 0 | 0.004629973 | GINS3    | 11.99297273 | 1.654449865 | 0.137951607 | 0.040418376 |
| TMEM8A   | 9.611800317 | 0 | 0 | 0.00472644  | JAML     | 0.604368716 | 0.083577747 | 0.138289334 | 0.027840738 |
| PALB2    | 0.775669504 | 0 | 0 | 0.004729519 | ZCCHC17  | 0.312233369 | 0.044147162 | 0.141391556 | 0.046598574 |
| DCAKD    | 1.949018602 | 0 | 0 | 0.004819058 | SPC24    | 7.813409502 | 1.107637864 | 0.141761143 | 0.007786305 |
| ZNF518B  | 1.380803034 | 0 | 0 | 0.00484205  | ARID4B   | 0.302984298 | 0.043053809 | 0.142099143 | 0.02823419  |
| MRPL55   | 3.369389923 | 0 | 0 | 0.004864299 | GABPB1   | 0.753879687 | 0.108050789 | 0.143326304 | 0.029996498 |
| ERAP2    | 1.21930009  | 0 | 0 | 0.004876192 | HDAC7    | 2.197684954 | 0.315438594 | 0.143532217 | 0.028435096 |
| C19orf47 | 0.734710232 | 0 | 0 | 0.004903551 | PATL1    | 1.716159234 | 0.246716208 | 0.143760674 | 0.037327042 |
| SLC35G1  | 0.545349611 | 0 | 0 | 0.004935427 | CDC42SE2 | 1.415724641 | 0.203670055 | 0.143862761 | 0.00861479  |
| GBGT1    | 1.229957988 | 0 | 0 | 0.005005141 | NAA35    | 0.789308589 | 0.113870118 | 0.144265652 | 0.027493089 |
| IFI35    | 2.514048217 | 0 | 0 | 0.005021772 | VTHB     | 0.997264118 | 0.144067719 | 0.144462953 | 0.03034819  |
| RHNO1    | 1.498736631 | 0 | 0 | 0.005032638 | BCAT2    | 4.161691845 | 0.601759779 | 0.144594987 | 0.045666105 |
| NAXD     | 0.443910001 | 0 | 0 | 0.005086981 | FBXO11   | 0.408343097 | 0.059174562 | 0.14491383  | 0.029523824 |
| PTDSS2   | 2.240276202 | 0 | 0 | 0.005350292 | CBLL1    | 0.587531302 | 0.085589465 | 0.145676434 | 0.029537702 |
| TTC27    | 0.84685233  | 0 | 0 | 0.005391739 | GINS2    | 45.43239319 | 6.642065489 | 0.14619669  | 0.035061384 |
| RWDD2A   | 1.196148465 | 0 | 0 | 0.005395705 | PPA2     | 0.675613211 | 0.099275091 | 0.146940719 | 0.028577555 |
| GATAD1   | 0.543703848 | 0 | 0 | 0.005395705 | TMED7    | 3.777682864 | 0.555903599 | 0.14715465  | 0.031695639 |
| TRAF4    | 4.345900388 | 0 | 0 | 0.00553028  | HEATR3   | 0.810189823 | 0.119799037 | 0.147865394 | 0.032415404 |
| NDUFC2   | 1.133441177 | 0 | 0 | 0.005573839 | TCF19    | 10.75495614 | 1.601767223 | 0.148932939 | 6.52E-05    |
| PRR5L    | 1.950266295 | 0 | 0 | 0.005607784 | INPPL1   | 4.085046015 | 0.615974577 | 0.150787672 | 0.031859357 |
| ZNF92    | 0.1162836   | 0 | 0 | 0.005684656 | FAU      | 0.638022152 | 0.096528942 | 0.151294029 | 0.011214577 |
| POFUT2   | 0.279382594 | 0 | 0 | 0.005718303 | ARID4A   | 0.29548227  | 0.045010801 | 0.152329955 | 0.049586214 |
| DKK2     | 0.295820028 | 0 | 0 | 0.005760622 | RAD51D   | 0.791427444 | 0.120723413 | 0.152538826 | 0.033216909 |
| TOM1     | 0.450354185 | 0 | 0 | 0.005772018 | ASPM     | 5.706311472 | 0.873689027 | 0.153109243 | 0.032974663 |
| ZNF783   | 0.28969202  | 0 | 0 | 0.005777314 | ZBTB41   | 0.586323775 | 0.090125313 | 0.153712534 | 0.032992884 |
| PRRG4    | 1.338860618 | 0 | 0 | 0.005784056 | GPR180   | 1.788764613 | 0.27545342  | 0.153990871 | 0.046215773 |
| FSD1L    | 0.309134589 | 0 | 0 | 0.005835635 | PIP4P2   | 0.78975534  | 0.122232455 | 0.154772559 | 0.047997668 |
| MYO6     | 0.175611947 | 0 | 0 | 0.005897717 | MRPL44   | 2.994312826 | 0.463806945 | 0.154895955 | 0.037173342 |
| ZNF804A  | 0.144877277 | 0 | 0 | 0.006004363 | GLT8D1   | 1.325066189 | 0.206954421 | 0.156184214 | 0.039001116 |
| ANKRD26  | 0.248577916 | 0 | 0 | 0.006075553 | MSANTD4  | 0.719787437 | 0.112721573 | 0.156603974 | 0.045810596 |
| PIDD1    | 6.803159271 | 0 | 0 | 0.006152337 | STARD9   | 0.504327438 | 0.079018961 | 0.15668186  | 0.040499245 |
| SPATA5L1 | 1.170232966 | 0 | 0 | 0.00626733  | TYMS     | 7.041168985 | 1.10335489  | 0.156700527 | 0.04698476  |
| SEMA4B   | 3.989116901 | 0 | 0 | 0.006353396 | BIN2     | 0.28641019  | 0.04492915  | 0.156869942 | 0.03982608  |
| KIAA1841 | 1.59564676  | 0 | 0 | 0.006353396 | MED25    | 2.417874208 | 0.379751317 | 0.157059997 | 0.033559267 |
| DTNB     | 0.436064439 | 0 | 0 | 0.006476235 | BCAP29   | 0.683513405 | 0.107753129 | 0.157645963 | 0.046399833 |
| NSDHL    | 0.508231548 | 0 | 0 | 0.006503797 | TMEM248  | 1.027365508 | 0.162159404 | 0.157840031 | 0.034288201 |
| FAAH     | 0.741653312 | 0 | 0 | 0.006738902 | PHTF2    | 1.296078733 | 0.204787359 | 0.158005339 | 0.033690162 |
| PTPN22   | 0.414980787 | 0 | 0 | 0.006812136 | STAM2    | 0.929404477 | 0.147046563 | 0.158215897 | 0.038260768 |
| NFS1     | 1.741765591 | 0 | 0 | 0.006979089 | PRKACB   | 1.402228514 | 0.222044587 | 0.158351214 | 0.047593987 |
| PRDM2    | 0.627957402 | 0 | 0 | 0.006996708 | PAFAH1B2 | 0.843473129 | 0.133800635 | 0.158630584 | 0.046632127 |
| TIGD6    | 0.676176555 | 0 | 0 | 0.007080923 | AFTPH    | 0.856774232 | 0.136192151 | 0.158959205 | 0.034553539 |
| TIAM2    | 0.381888701 | 0 | 0 | 0.00712145  | NR2C1    | 0.229778952 | 0.036727123 | 0.159836759 | 0.037336437 |
| TIMM9    | 0.195660229 | 0 | 0 | 0.007148595 | IFNGR2   | 0.928516164 | 0.149577001 | 0.161092512 | 0.038145684 |
| UCHL3    | 0.850839306 | 0 | 0 | 0.007169587 | ATP6AP2  | 1.218634661 | 0.196390221 | 0.161155945 | 0.041041134 |
| MIF4GD   | 3.944218629 | 0 | 0 | 0.007221827 | ATP8B4   | 0.221579159 | 0.035786263 | 0.161505546 | 0.040876053 |
| ZNF527   | 0.177207032 | 0 | 0 | 0.007221876 | NIPA1    | 1.292014583 | 0.209132511 | 0.161865442 | 0.009143112 |
| NSRP1    | 0.049430377 | 0 | 0 | 0.00723003  | PDK2     | 3.980010869 | 0.651906428 | 0.163795138 | 0.040211105 |
| GSTCD    | 2.490806664 | 0 | 0 | 0.007242155 | KDELC2   | 23.16570414 | 3.847316622 | 0.166078121 | 0.037531299 |
| MITD1    | 0.045578301 | 0 | 0 | 0.007300089 | RB1      | 0.874972932 | 0.145315304 | 0.166079771 | 0.037002581 |
| FAM3C    | 0.293536932 | 0 | 0 | 0.007324774 | POU2F2   | 0.803006116 | 0.133507821 | 0.16626003  | 0.043899972 |
| SMIM12   | 0.427369049 | 0 | 0 | 0.007357194 | PNPLA6   | 7.768612642 | 1.296609469 | 0.166903607 | 0.046629647 |
| ZNF768   | 1.689097534 | 0 | 0 | 0.007360206 | UBE2Z    | 1.407404638 | 0.235984227 | 0.167673333 | 0.041520051 |
| ABCC5    | 0.231446972 | 0 | 0 | 0.007405126 | ARHGAP19 | 3.040345425 | 0.511299159 | 0.168171404 | 0.038645037 |
| CGREF1   | 1.383158292 | 0 | 0 | 0.007423892 | RNF26    | 8.756653289 | 1.476014553 | 0.168559209 | 0.041634612 |
| SPRYD4   | 0.166994917 | 0 | 0 | 0.007503441 | ADH5     | 1.190942083 | 0.2018807   | 0.169513449 | 0.045504816 |
| GJA3     | 3.148694893 | 0 | 0 | 0.007611844 | ORC5     | 1.195698441 | 0.203191614 | 0.169935501 | 0.042394101 |
| IGF1     | 7.871737232 | 0 | 0 | 0.007611844 | SMARCAD1 | 0.769554811 | 0.133610199 | 0.17362012  | 0.041539222 |
| LHPP     | 4.723042339 | 0 | 0 | 0.007611844 | CIAO1    | 0.77865585  | 0.136207959 | 0.174927035 | 0.049733518 |
| GPRC5C   | 4.723042339 | 0 | 0 | 0.007611844 | C5orf24  | 1.082234996 | 0.189875659 | 0.175447717 | 0.043947792 |
| HELO     | 0.234664562 | 0 | 0 | 0.007620412 | MCM9     | 0.541158632 | 0.095168822 | 0.175861229 | 0.042649137 |
| GDAP1    | 0.547222089 | 0 | 0 | 0.007744154 | SPC25    | 6.348623282 | 1.121393084 | 0.176635632 | 0.028924231 |

|            |             |   |   |             |           |             |             |             |             |
|------------|-------------|---|---|-------------|-----------|-------------|-------------|-------------|-------------|
| AC069544.2 | 5.551010672 | 0 | 0 | 0.007798112 | MAP3K4    | 0.807411192 | 0.143254572 | 0.177424556 | 0.047863724 |
| APOBEC3G   | 0.593539078 | 0 | 0 | 0.007806725 | TCIRG1    | 8.137741579 | 1.44868095  | 0.178020024 | 0.043856109 |
| PIGH       | 1.655318098 | 0 | 0 | 0.007826272 | ELK4      | 1.033286025 | 0.185124799 | 0.179161234 | 0.009271862 |
| HIST2H2BF  | 1.885850837 | 0 | 0 | 0.007948368 | NUSAP1    | 2.874561127 | 0.519022967 | 0.18055729  | 0.001629989 |
| JAK2       | 0.405760741 | 0 | 0 | 0.007951488 | U2SURP    | 0.587653158 | 0.106506919 | 0.181241124 | 0.013489481 |
| FRA10AC1   | 0.07302702  | 0 | 0 | 0.007986145 | MRPS23    | 0.34909807  | 0.06375613  | 0.182631001 | 0.046848083 |
| PPM1H      | 2.258526074 | 0 | 0 | 0.008023719 | IMP3      | 4.24715856  | 0.777149851 | 0.182981125 | 0.012357405 |
| ABHD5      | 0.747889508 | 0 | 0 | 0.008067193 | LEPROT    | 1.38779714  | 0.253989517 | 0.183016314 | 0.047296477 |
| TPRKB      | 0.562026997 | 0 | 0 | 0.008082094 | OSGIN2    | 1.497939903 | 0.277326852 | 0.185138837 | 0.048347966 |
| MAPK7      | 6.421559465 | 0 | 0 | 0.008172087 | AGK       | 0.692712187 | 0.128665742 | 0.185741993 | 0.049960225 |
| ZSCAN26    | 0.160697505 | 0 | 0 | 0.008201176 | RSRC1     | 0.498059487 | 0.092811669 | 0.186346554 | 0.025759664 |
| BBS10      | 0.39889283  | 0 | 0 | 0.008263173 | LATS2     | 1.50031324  | 0.282919552 | 0.188573655 | 0.013882655 |
| ATP5J2     | 0.649194456 | 0 | 0 | 0.008274581 | MAPK11PIL | 1.783075615 | 0.347019954 | 0.194618754 | 0.035116569 |
| MRGBP      | 0.357237742 | 0 | 0 | 0.008307667 | UBXN7     | 1.409837687 | 0.279800476 | 0.1984629   | 0.029894396 |
| ZNF322     | 0.430199719 | 0 | 0 | 0.008405309 | PURA      | 1.328214579 | 0.272135163 | 0.204887951 | 0.009459548 |
| ZNF275     | 2.420417364 | 0 | 0 | 0.008446802 | HIST1H2BC | 3.33945113  | 0.689690668 | 0.206528151 | 0.032619381 |
| HPCAL1     | 1.181505728 | 0 | 0 | 0.008452349 | ZBTB44    | 0.711549384 | 0.149725806 | 0.210422227 | 0.033677573 |
| CHTF18     | 8.548180556 | 0 | 0 | 0.008489844 | MCM4      | 9.154073013 | 1.927158061 | 0.210524655 | 0.015863857 |
| C3orf58    | 1.270404677 | 0 | 0 | 0.008532005 | ARFGEF1   | 0.692348909 | 0.148265338 | 0.214148294 | 0.023619467 |
| NEPRO      | 0.655804256 | 0 | 0 | 0.008741545 | SHCBP1    | 12.12604415 | 2.605388573 | 0.214858905 | 0.049737347 |
| CCDC134    | 0.823516158 | 0 | 0 | 0.008806459 | PSMC3     | 1.276369679 | 0.277258473 | 0.217224271 | 0.043650064 |
| OGG1       | 0.380879558 | 0 | 0 | 0.008855559 | ZHX1      | 0.513390953 | 0.111879071 | 0.217921781 | 0.006483832 |
| ZBTB22     | 0.680038634 | 0 | 0 | 0.008882814 | ZFP91     | 1.813458084 | 0.402497312 | 0.22195016  | 0.033492127 |
| SPIN3      | 0.46909685  | 0 | 0 | 0.008884016 | LMO4      | 1.809443074 | 0.402826608 | 0.222624637 | 0.028071891 |
| RNF7       | 0.455455934 | 0 | 0 | 0.008929029 | TEX15     | 1.43930724  | 0.32150887  | 0.223377512 | 0.016937354 |
| CHCHD5     | 2.233038738 | 0 | 0 | 0.009007689 | DCK       | 1.509493099 | 0.339362849 | 0.224819079 | 0.024821311 |
| COMMD6     | 0.147046465 | 0 | 0 | 0.009099288 | KCTD12    | 3.909493368 | 0.89511417  | 0.228959122 | 0.022552081 |
| MPEG1      | 1.253524856 | 0 | 0 | 0.009197053 | IL6R      | 2.279741365 | 0.526664203 | 0.231019277 | 0.010319685 |
| SNRPF      | 0.12355334  | 0 | 0 | 0.009211057 | RAB21     | 0.834609476 | 0.193467558 | 0.231806088 | 0.041579585 |
| MPST       | 2.341936594 | 0 | 0 | 0.009248842 | HIST1H2AJ | 9.030359162 | 2.099536932 | 0.232497611 | 0.032555372 |
| MANSC1     | 3.250722577 | 0 | 0 | 0.009260895 | CDC45     | 24.22681623 | 5.684966529 | 0.234655948 | 0.046331284 |
| ZNF786     | 0.531269197 | 0 | 0 | 0.009637328 | MAT2A     | 0.247132522 | 0.058304393 | 0.235923595 | 0.01681557  |
| RPS27      | 0.028945177 | 0 | 0 | 0.009886984 | DTL       | 9.80507964  | 2.313914107 | 0.235991363 | 0.035477043 |
| DPCD       | 1.760712209 | 0 | 0 | 0.010061638 | CNOT9     | 1.564480003 | 0.371282124 | 0.237319827 | 0.002535424 |
| SAMSN1     | 0.223735067 | 0 | 0 | 0.010108496 | CTDSPL2   | 1.291734603 | 0.308100314 | 0.23851673  | 0.01392732  |
| TATDN1     | 0.026902112 | 0 | 0 | 0.010194235 | ATP5J     | 0.470635707 | 0.1123613   | 0.238743679 | 0.047981513 |
| ENDOD1     | 5.180802052 | 0 | 0 | 0.010208737 | ATAD5     | 3.862821509 | 0.932241407 | 0.24133691  | 0.003659245 |
| ULK1       | 3.700572894 | 0 | 0 | 0.010208737 | SLC44A1   | 1.488637978 | 0.363712984 | 0.244326014 | 0.026482802 |
| ALKBH8     | 0.38087292  | 0 | 0 | 0.010366984 | CREB3L2   | 1.176130517 | 0.288860389 | 0.245602325 | 0.020291189 |
| DNAJB9     | 0.655562863 | 0 | 0 | 0.010596683 | CCNC      | 1.06734331  | 0.26278593  | 0.246205628 | 0.022231933 |
| C11orf68   | 5.462442754 | 0 | 0 | 0.010699467 | ZNF652    | 0.802182659 | 0.197602475 | 0.246331023 | 0.041445888 |
| GPR157     | 1.170523447 | 0 | 0 | 0.010699467 | AP3B1     | 0.64285436  | 0.159126387 | 0.247531007 | 0.02942729  |
| ZBTB20     | 0.294319136 | 0 | 0 | 0.010815054 | URI1      | 0.527542828 | 0.133169879 | 0.252434252 | 0.029467717 |
| DCAF5      | 0.26701741  | 0 | 0 | 0.011001091 | HMMR      | 6.894215721 | 1.754679953 | 0.254514803 | 0.006439281 |
| ALDH3B1    | 2.336784842 | 0 | 0 | 0.011109846 | ZWINT     | 7.344428752 | 1.874831268 | 0.255272579 | 0.0213428   |
| C14orf93   | 0.573085104 | 0 | 0 | 0.011202461 | IMPAD1    | 2.466070895 | 0.630870642 | 0.255820156 | 0.021828593 |
| PCNX2      | 0.176164256 | 0 | 0 | 0.011205473 | STK4      | 0.686917702 | 0.176906399 | 0.257536527 | 0.020224349 |
| ZBTB5      | 1.065784189 | 0 | 0 | 0.011326121 | ENPP2     | 0.620491746 | 0.16079897  | 0.259147637 | 0.027228459 |
| PDCD2L     | 1.856815709 | 0 | 0 | 0.011354904 | NCOA3     | 0.630581594 | 0.16548339  | 0.262429782 | 0.007510242 |
| S100BPB    | 0.45373801  | 0 | 0 | 0.011559873 | STX6      | 0.769459464 | 0.203199619 | 0.264080993 | 0.048672708 |
| MTX1       | 0.333136594 | 0 | 0 | 0.011585498 | BNIP3L    | 1.034126493 | 0.279236514 | 0.270021623 | 0.028782708 |
| PEX3       | 1.336250432 | 0 | 0 | 0.01168331  | ZBTB33    | 1.430671985 | 0.387798797 | 0.271060593 | 0.004464171 |
| TMEM256    | 0.272169504 | 0 | 0 | 0.011804517 | CAND1     | 1.623426174 | 0.440532514 | 0.271359746 | 0.044436946 |
| ZNF134     | 0.259359895 | 0 | 0 | 0.011829475 | EML4      | 1.096106021 | 0.298788671 | 0.272591032 | 0.033271669 |
| PEX12      | 0.501942315 | 0 | 0 | 0.011881101 | PTBP3     | 1.026385134 | 0.284689115 | 0.277370653 | 0.016740658 |
| TRAPPC3    | 1.394949306 | 0 | 0 | 0.011971318 | OPA1      | 0.98389607  | 0.273465051 | 0.277940993 | 0.004995713 |
| C21orf59   | 1.343101545 | 0 | 0 | 0.011979406 | TMEM154   | 0.426452397 | 0.119872612 | 0.281092598 | 0.029647298 |
| NUDT1      | 2.642925407 | 0 | 0 | 0.012050261 | CCR2      | 2.694263232 | 0.758988911 | 0.281705552 | 0.027693094 |
| IPPK       | 1.345155872 | 0 | 0 | 0.012270488 | TMEM123   | 0.746088668 | 0.211855466 | 0.28395481  | 0.036897211 |
| CD2BP2     | 2.395954415 | 0 | 0 | 0.012274653 | WDFY2     | 0.609253518 | 0.173339591 | 0.284511432 | 0.047992798 |
| NPTN       | 1.250300385 | 0 | 0 | 0.012313881 | PPP2CA    | 1.840763226 | 0.524553393 | 0.284965163 | 0.032640005 |



|          |             |   |   |             |           |             |             |             |             |
|----------|-------------|---|---|-------------|-----------|-------------|-------------|-------------|-------------|
| ZNF337   | 0.174649554 | 0 | 0 | 0.012341574 | HIST1H2AE | 3.769716804 | 1.082845648 | 0.28724854  | 0.002803916 |
| POLR2M   | 0.785578541 | 0 | 0 | 0.012356086 | NIP7      | 0.987340496 | 0.28677148  | 0.290448413 | 0.005141454 |
| MAN2C1   | 0.851639619 | 0 | 0 | 0.012529338 | TBC1D5    | 0.935446529 | 0.272711483 | 0.291530809 | 0.021320637 |
| LYRM7    | 0.920645717 | 0 | 0 | 0.012594883 | SEL1L3    | 1.441406874 | 0.424691939 | 0.294637098 | 0.03163562  |
| MRPL46   | 1.471532338 | 0 | 0 | 0.012797809 | FBXL20    | 1.147876064 | 0.340717143 | 0.296823981 | 0.043055708 |
| SYT11    | 1.487229229 | 0 | 0 | 0.012804583 | ENG       | 7.313864947 | 2.175153597 | 0.297401389 | 0.028161603 |
| LMTK3    | 6.44465999  | 0 | 0 | 0.012804583 | BDP1      | 0.337876343 | 0.101165104 | 0.299414582 | 0.037077933 |
| TMEM106C | 2.900096996 | 0 | 0 | 0.012804583 | E2F8      | 15.63458422 | 4.703472963 | 0.300837739 | 0.04729932  |
| NCK1     | 0.347502353 | 0 | 0 | 0.012829884 | DBI       | 0.133835842 | 0.040663612 | 0.303832003 | 0.039929137 |
| PIGA     | 1.110716407 | 0 | 0 | 0.01286847  | ORC1      | 14.80900594 | 4.51995622  | 0.30521672  | 0.027196298 |
| GRIN2D   | 1.43884437  | 0 | 0 | 0.012910317 | MKI67     | 7.081167407 | 2.190631252 | 0.309360184 | 0.040934374 |
| PARP3    | 0.362832106 | 0 | 0 | 0.012948822 | WIPI2     | 1.449414706 | 0.450755518 | 0.310991406 | 0.000476708 |
| FPGT     | 0.428573297 | 0 | 0 | 0.0129919   | TSN       | 1.634251349 | 0.508600782 | 0.311213316 | 0.02107987  |
| SNUPN    | 0.349005433 | 0 | 0 | 0.013007509 | TTBK2     | 1.054670091 | 0.329993259 | 0.312887662 | 0.030365834 |
| BTG3     | 1.675379028 | 0 | 0 | 0.013066905 | TP53      | 3.84195241  | 1.20279987  | 0.313069955 | 0.007503024 |
| RPAIN    | 0.127957674 | 0 | 0 | 0.0131108   | ATG2B     | 0.838230426 | 0.264229683 | 0.315223207 | 0.015495062 |
| NAPG     | 0.541867826 | 0 | 0 | 0.013187156 | KNL1      | 5.577144853 | 1.769203724 | 0.317223915 | 0.017065458 |
| DHRS11   | 2.707858131 | 0 | 0 | 0.013196633 | GPD1L     | 5.418092397 | 1.735464131 | 0.320309069 | 0.021713866 |
| USP45    | 0.224394955 | 0 | 0 | 0.013373673 | DDX3Y     | 0.368497381 | 0.119480523 | 0.324237102 | 0.035540123 |
| FAM8A1   | 1.179153846 | 0 | 0 | 0.013449881 | ABCB10    | 8.402995859 | 2.729861272 | 0.324867621 | 0.004989901 |
| AGL      | 0.809623913 | 0 | 0 | 0.013485446 | SDHB      | 0.612715367 | 0.199925093 | 0.326293584 | 0.027794918 |
| CALCOCO1 | 0.27533219  | 0 | 0 | 0.013587363 | E2F3      | 0.741945001 | 0.243289129 | 0.327907229 | 0.045407804 |
| ZDHHC18  | 4.241986067 | 0 | 0 | 0.013626269 | LAMP2     | 0.930821378 | 0.306837946 | 0.329642135 | 0.018859692 |
| ALPK1    | 0.127274092 | 0 | 0 | 0.01367534  | RBM25     | 0.155052762 | 0.051227961 | 0.330390509 | 0.00325899  |
| MORN2    | 0.977400881 | 0 | 0 | 0.013720113 | RLIM      | 0.52295817  | 0.173178683 | 0.331152075 | 0.019664577 |
| ZNF791   | 0.148464576 | 0 | 0 | 0.013850908 | GALNT1    | 0.730882664 | 0.242335031 | 0.331564891 | 0.00771686  |
| MEAF6    | 0.616260284 | 0 | 0 | 0.013866799 | MESD      | 0.79931852  | 0.266308322 | 0.333169213 | 0.033772723 |
| AP3S1    | 0.122363384 | 0 | 0 | 0.014050855 | TMEM14C   | 0.273813836 | 0.091481866 | 0.334102423 | 0.047696724 |
| RABGGTA  | 3.422030641 | 0 | 0 | 0.01418135  | NEK4      | 1.674904074 | 0.559637886 | 0.334131306 | 0.02789627  |
| CWF19L2  | 0.116655252 | 0 | 0 | 0.014236053 | AGTPBP1   | 0.784123425 | 0.262442018 | 0.334694781 | 0.041879342 |
| SPRED1   | 0.635293955 | 0 | 0 | 0.01432779  | NNT       | 2.465794039 | 0.825764924 | 0.334888036 | 0.034405317 |
| ZSWIM4   | 1.697105202 | 0 | 0 | 0.014370119 | PPP4R2    | 0.881215764 | 0.296350027 | 0.336296783 | 0.03413315  |
| A2M      | 1.697105202 | 0 | 0 | 0.014370119 | OPN3      | 2.666701634 | 0.89935006  | 0.33725185  | 0.049590008 |
| ERCC6    | 0.567714568 | 0 | 0 | 0.014423939 | ERNA1     | 2.969285257 | 1.002641053 | 0.337670842 | 0.037028549 |
| NAGLU    | 3.271015799 | 0 | 0 | 0.014527447 | PTPRJ     | 1.595961975 | 0.54056125  | 0.338705595 | 0.021213773 |
| RHOA     | 0.17901445  | 0 | 0 | 0.01464498  | POLE3     | 1.343661394 | 0.456276664 | 0.339577118 | 0.029059357 |
| CHMP3    | 1.058313587 | 0 | 0 | 0.014723303 | FANCI     | 2.922293723 | 0.995092177 | 0.340517508 | 0.008757095 |
| KRIT1    | 0.379351367 | 0 | 0 | 0.01476493  | PLEKHA2   | 0.963380269 | 0.3289729   | 0.341477722 | 0.037868959 |
| PAPLN    | 0.762411616 | 0 | 0 | 0.014812036 | FBXO45    | 1.673417013 | 0.572126801 | 0.34189135  | 3.24E-05    |
| ALDOC    | 12.47426799 | 0 | 0 | 0.014845078 | SPCS3     | 3.67502773  | 1.260274989 | 0.342929382 | 0.031001094 |
| NUS1     | 0.316067534 | 0 | 0 | 0.014860302 | PPP4R3B   | 0.731448846 | 0.251158542 | 0.343371301 | 0.039030572 |
| UMAD1    | 0.357341917 | 0 | 0 | 0.014878482 | BMP1      | 3.194115648 | 1.100356945 | 0.344495023 | 0.017928682 |
| TMEM170A | 1.333121354 | 0 | 0 | 0.014919945 | HIST1H2BL | 9.0623078   | 3.136555012 | 0.346109962 | 0.027509604 |
| ARHGAP44 | 0.491638829 | 0 | 0 | 0.014941143 | PPA1      | 0.86965961  | 0.304141591 | 0.349724866 | 0.015839774 |
| PWWP2A   | 0.789680292 | 0 | 0 | 0.014983345 | NDRG1     | 0.874576441 | 0.310314942 | 0.354817404 | 0.049000797 |
| NARS2    | 1.096828015 | 0 | 0 | 0.015148202 | AREL1     | 1.286807842 | 0.458745731 | 0.356499017 | 0.049321027 |
| SEZ6L2   | 0.804285753 | 0 | 0 | 0.015263892 | MLLT10    | 0.43664873  | 0.155938109 | 0.357124843 | 0.02059904  |
| TYW5     | 0.106965488 | 0 | 0 | 0.015303725 | GPR85     | 2.189170573 | 0.799892415 | 0.365386062 | 0.01018386  |
| GMCL1    | 1.072977352 | 0 | 0 | 0.015380179 | SHMT1     | 15.6179651  | 5.712801734 | 0.365783999 | 0.016094977 |
| ABHD17A  | 0.426499162 | 0 | 0 | 0.015451376 | PCYT2     | 3.368073691 | 1.233119695 | 0.366120165 | 0.024347105 |
| BLOC1S5  | 1.180148162 | 0 | 0 | 0.015469235 | MRPS30    | 1.64806608  | 0.611847727 | 0.371251939 | 0.042789658 |
| JKAMP    | 0.536686585 | 0 | 0 | 0.015552537 | RNF38     | 1.065138148 | 0.398506417 | 0.374135898 | 0.01303926  |
| TUBA1A   | 0.977038793 | 0 | 0 | 0.015690892 | TRIP12    | 0.83178538  | 0.3149906   | 0.378692157 | 0.019372554 |
| CCDC50   | 0.819399519 | 0 | 0 | 0.015692752 | UBE2V2    | 0.737425569 | 0.280592547 | 0.380502872 | 0.029522258 |
| ANAPC16  | 0.274191871 | 0 | 0 | 0.015748569 | STAU1     | 1.362898494 | 0.521409847 | 0.382574234 | 0.040760547 |
| SEPSECS  | 0.421178569 | 0 | 0 | 0.015789093 | RUNX1     | 2.374964693 | 0.910867082 | 0.383528683 | 0.021598335 |
| SMAD3    | 0.700868792 | 0 | 0 | 0.015922935 | ATP6V1C1  | 1.119849437 | 0.429646741 | 0.383664738 | 0.007205555 |
| GPR65    | 0.271125095 | 0 | 0 | 0.015967897 | PAICS     | 1.10898296  | 0.426678288 | 0.38474738  | 0.02070861  |
| OTUD7B   | 0.595204169 | 0 | 0 | 0.016025187 | CPPED1    | 1.62799027  | 0.629087109 | 0.386419453 | 0.026578305 |
| SS18L1   | 1.198239303 | 0 | 0 | 0.016064167 | PPP1CB    | 1.402917545 | 0.542779222 | 0.386893174 | 0.026577422 |
| UROD     | 0.495337609 | 0 | 0 | 0.016097351 | ATP6V1A   | 0.952617115 | 0.370232346 | 0.38864759  | 0.016712925 |

|           |             |   |   |             |          |             |             |             |             |
|-----------|-------------|---|---|-------------|----------|-------------|-------------|-------------|-------------|
| POC5      | 0.336870673 | 0 | 0 | 0.016123376 | TPX2     | 4.642905809 | 1.806257916 | 0.389036089 | 0.031835101 |
| GAREM1    | 1.97856438  | 0 | 0 | 0.016222776 | PSME3    | 1.699277149 | 0.66515551  | 0.391434387 | 0.008638401 |
| FAM120AOS | 0.388077681 | 0 | 0 | 0.016251804 | KDM3A    | 0.334353399 | 0.131522118 | 0.393362587 | 0.009372876 |
| SIGIRR    | 6.892665586 | 0 | 0 | 0.016316666 | TRIM26   | 1.83741485  | 0.72649412  | 0.395389272 | 0.02176697  |
| CRY1      | 1.448597553 | 0 | 0 | 0.016351094 | PLAGL2   | 1.683323207 | 0.666148042 | 0.395733891 | 0.005682844 |
| TRMT1L    | 0.693284398 | 0 | 0 | 0.016390938 | NISCH    | 1.164205879 | 0.461046639 | 0.396018133 | 0.008205652 |
| AHI1      | 0.2301842   | 0 | 0 | 0.016449699 | KPNA4    | 0.796212789 | 0.317863661 | 0.399219487 | 0.01961316  |
| ZNF224    | 0.105917795 | 0 | 0 | 0.01647492  | RNF114   | 0.975786918 | 0.39298523  | 0.402736727 | 0.008867449 |
| PAPD7     | 2.190375352 | 0 | 0 | 0.016570241 | WDR43    | 0.494014199 | 0.199797266 | 0.404436282 | 0.048235872 |
| HHEX      | 1.588147623 | 0 | 0 | 0.016584053 | PTCD3    | 0.426335772 | 0.173284195 | 0.406450048 | 0.026993093 |
| ZNF362    | 1.450338127 | 0 | 0 | 0.016609492 | NCALD    | 0.869533177 | 0.355017396 | 0.408285049 | 0.032030808 |
| C17orf97  | 0.668223602 | 0 | 0 | 0.016638672 | CAPG     | 1.255429891 | 0.513445848 | 0.408980104 | 0.024898203 |
| COX20     | 0.112701861 | 0 | 0 | 0.01676477  | BAZ2B    | 0.217070981 | 0.089036454 | 0.410172072 | 0.035533966 |
| ZNF33A    | 0.11513187  | 0 | 0 | 0.016776576 | UNG      | 5.624021561 | 2.319376865 | 0.412405401 | 0.02415065  |
| TMEM177   | 2.570997789 | 0 | 0 | 0.016781051 | NETO2    | 2.261963726 | 0.936771843 | 0.414140966 | 0.030601483 |
| UBE2D4    | 0.552790516 | 0 | 0 | 0.016838377 | ATAD2    | 2.832617489 | 1.176453971 | 0.415323981 | 0.031595923 |
| GAPT      | 1.093315273 | 0 | 0 | 0.017053449 | CLN8     | 1.486368826 | 0.619557026 | 0.416825902 | 0.011568563 |
| CNTLN     | 0.536442878 | 0 | 0 | 0.017113104 | DYRK1A   | 1.047271924 | 0.438129944 | 0.418353566 | 0.033557771 |
| SPG7      | 0.752498839 | 0 | 0 | 0.017403091 | HMGB1    | 0.401303444 | 0.168873325 | 0.42081205  | 0.044916063 |
| ZNF76     | 0.432926158 | 0 | 0 | 0.017436916 | DNAJC10  | 0.687592979 | 0.289509576 | 0.421047894 | 0.018912219 |
| FAM217B   | 1.307193623 | 0 | 0 | 0.017448139 | IREB2    | 0.814314061 | 0.343863391 | 0.422273675 | 0.046965591 |
| SLC4A1AP  | 0.506067563 | 0 | 0 | 0.017531672 | ANP32E   | 0.869610749 | 0.371862273 | 0.427619223 | 0.037340984 |
| POLR2I    | 0.99541869  | 0 | 0 | 0.017565972 | PSMB1    | 1.758741339 | 0.754043678 | 0.428740521 | 0.030207629 |
| NAT1      | 1.869372822 | 0 | 0 | 0.017591732 | APPL1    | 0.767115345 | 0.330727937 | 0.431131953 | 0.04510942  |
| STMP1     | 0.567093743 | 0 | 0 | 0.017598296 | SERINC1  | 0.666750717 | 0.28969702  | 0.434490751 | 0.029553299 |
| AKR7A3    | 0.899432614 | 0 | 0 | 0.017628787 | ZFP36    | 1.240405928 | 0.539562273 | 0.434988467 | 0.026727102 |
| RNF2      | 1.530198221 | 0 | 0 | 0.017662788 | EPB41    | 1.134256077 | 0.500417129 | 0.441185319 | 0.017160913 |
| CCDC15    | 1.351674811 | 0 | 0 | 0.018043623 | FAM208B  | 0.776466041 | 0.342979555 | 0.44171868  | 0.004185561 |
| ZNF546    | 0.349928288 | 0 | 0 | 0.018543347 | PRDX6    | 1.907122615 | 0.84540018  | 0.443285698 | 0.027150277 |
| ZDHHC21   | 0.144674562 | 0 | 0 | 0.01855584  | TMPO     | 2.933481603 | 1.306481283 | 0.445368835 | 0.03138992  |
| DPH6      | 0.131382353 | 0 | 0 | 0.018698402 | RPS23    | 0.169541819 | 0.075719994 | 0.446615439 | 0.043837709 |
| CBWD1     | 0.075587151 | 0 | 0 | 0.018894276 | TGOLN2   | 0.840261301 | 0.382942126 | 0.455741715 | 0.033976158 |
| EMP2      | 22.53806004 | 0 | 0 | 0.018971679 | NACA     | 0.046214061 | 0.021108475 | 0.456754385 | 0.043504859 |
| PRADC1    | 12.87889145 | 0 | 0 | 0.018971679 | TMEM245  | 2.347156098 | 1.085676947 | 0.462549955 | 0.031024945 |
| MMP15     | 15.02537336 | 0 | 0 | 0.018971679 | TMOD3    | 1.284460881 | 0.605408844 | 0.471333034 | 0.022923052 |
| RARG      | 1.502537336 | 0 | 0 | 0.018971679 | CPSF7    | 3.075247279 | 1.45321163  | 0.472551147 | 0.007346798 |
| PXMP2     | 15.02537336 | 0 | 0 | 0.018971679 | VPS41    | 0.805556964 | 0.382180501 | 0.474430137 | 0.028807335 |
| TIMM22    | 1.959831308 | 0 | 0 | 0.018971679 | PIP4K2B  | 2.614406287 | 1.242786646 | 0.475360946 | 0.027454791 |
| PDHX      | 0.413340986 | 0 | 0 | 0.019002611 | CYP1B1   | 1.175288029 | 0.561264965 | 0.477555247 | 0.026875758 |
| ERI2      | 0.459091287 | 0 | 0 | 0.019029499 | ZNF292   | 0.380999303 | 0.182783151 | 0.479746681 | 0.039593094 |
| TEC       | 0.070126282 | 0 | 0 | 0.019078023 | SEC23B   | 1.172952643 | 0.56711823  | 0.483496272 | 0.041935774 |
| SLC2A13   | 1.282329959 | 0 | 0 | 0.019112234 | UBE2W    | 0.26535053  | 0.128733919 | 0.485146644 | 0.032149949 |
| RIPK2     | 1.130572345 | 0 | 0 | 0.019120797 | RIF1     | 0.956007391 | 0.469094328 | 0.49068065  | 0.036994921 |
| PRKX      | 0.628013979 | 0 | 0 | 0.019229862 | ZBED1    | 3.007646092 | 1.486922123 | 0.494380681 | 0.043989679 |
| UGGT2     | 0.118972863 | 0 | 0 | 0.019443581 | MDN1     | 0.53158179  | 0.263259595 | 0.495238174 | 0.020727461 |
| MED26     | 1.143923164 | 0 | 0 | 0.019522063 | LRPPRC   | 0.726995159 | 0.360702076 | 0.496154715 | 0.042522384 |
| UBE2E2    | 0.801817001 | 0 | 0 | 0.019541848 | RNMT     | 0.72549479  | 0.360767053 | 0.497270357 | 0.03128782  |
| POMGNT1   | 0.658029591 | 0 | 0 | 0.019586675 | BCL2     | 0.788530911 | 0.394021989 | 0.49969124  | 0.032201259 |
| PPM1E     | 2.194243904 | 0 | 0 | 0.019605683 | ERAP1    | 1.31913799  | 0.660292879 | 0.500548755 | 0.003917717 |
| DHX40     | 0.489994999 | 0 | 0 | 0.019608806 | SKAP2    | 1.374831204 | 0.696219459 | 0.506403591 | 0.035211574 |
| ERCC8     | 0.389917538 | 0 | 0 | 0.019906274 | MED13    | 1.248908261 | 0.633143675 | 0.506957712 | 0.037229979 |
| SLC25A17  | 1.249646519 | 0 | 0 | 0.019980354 | MRPS22   | 0.433344571 | 0.219746923 | 0.507095133 | 0.014084646 |
| GID4      | 0.880886961 | 0 | 0 | 0.019993946 | SNX27    | 1.376722761 | 0.702152359 | 0.510017252 | 0.014580961 |
| ZNF114    | 0.869427936 | 0 | 0 | 0.020009271 | NUDT21   | 2.459793512 | 1.256989373 | 0.511014183 | 0.010331238 |
| ZNF747    | 1.548634636 | 0 | 0 | 0.020096118 | FEM1B    | 1.212660425 | 0.620337458 | 0.511550839 | 0.027524181 |
| SPPL2A    | 0.74358749  | 0 | 0 | 0.020153218 | DACH1    | 1.261807405 | 0.648489352 | 0.513936873 | 0.043924632 |
| PPT2      | 1.936552909 | 0 | 0 | 0.020173909 | STRAP    | 0.635306132 | 0.32740397  | 0.515348355 | 0.043636993 |
| TGM5      | 0.237131391 | 0 | 0 | 0.020189579 | DNAJA2   | 0.26115751  | 0.134952541 | 0.516747694 | 0.023354322 |
| RNF103    | 0.728017814 | 0 | 0 | 0.020206497 | FAM107B  | 0.411898711 | 0.213565595 | 0.518490564 | 0.034065838 |
| SCMH1     | 0.692890506 | 0 | 0 | 0.020241129 | HIST1H1B | 7.84348031  | 4.105365332 | 0.523411186 | 0.020623305 |
| C1orf109  | 1.373885949 | 0 | 0 | 0.020304628 | GNB4     | 1.56177853  | 0.822735286 | 0.526793825 | 0.04910172  |

|           |             |   |   |             |           |             |             |             |             |
|-----------|-------------|---|---|-------------|-----------|-------------|-------------|-------------|-------------|
| REXO2     | 0.632539397 | 0 | 0 | 0.020399    | SLC6A6    | 1.326376981 | 0.699243337 | 0.527182956 | 0.012900966 |
| SMDT1     | 0.679584921 | 0 | 0 | 0.020601127 | TIAL1     | 0.923458897 | 0.491588731 | 0.532334176 | 0.006312258 |
| PPP1R15A  | 0.293485804 | 0 | 0 | 0.020655647 | PGM2      | 1.712202643 | 0.915091137 | 0.534452529 | 0.030523133 |
| HIPK2     | 0.924102175 | 0 | 0 | 0.020702562 | MSL2      | 1.491629575 | 0.807404649 | 0.541290319 | 0.046049751 |
| PHKA1     | 0.986609377 | 0 | 0 | 0.020756551 | AFF3      | 0.909990398 | 0.494448905 | 0.543356178 | 0.006344607 |
| FLVCR1    | 0.950983616 | 0 | 0 | 0.020935285 | DDX46     | 0.745437141 | 0.405677672 | 0.544214461 | 0.013885634 |
| HDAC9     | 0.52083034  | 0 | 0 | 0.021111382 | STRN      | 1.869661867 | 1.026104329 | 0.54881813  | 0.049437036 |
| DTWD2     | 1.479697725 | 0 | 0 | 0.021143432 | ARL6IP1   | 1.828235539 | 1.006683581 | 0.550631229 | 0.043003873 |
| CHMP6     | 2.5820346   | 0 | 0 | 0.021183182 | UBE2D3    | 0.326483209 | 0.180509752 | 0.55289138  | 0.021706091 |
| SKA2      | 0.490515239 | 0 | 0 | 0.021327738 | MTDH      | 0.862939033 | 0.478057105 | 0.553987115 | 0.022479229 |
| LDLRAD3   | 1.415542863 | 0 | 0 | 0.021355146 | XPO4      | 1.695156914 | 0.941850511 | 0.555612583 | 0.035131479 |
| KPTN      | 1.656429545 | 0 | 0 | 0.021409207 | LRRFIP1   | 0.444798361 | 0.248090729 | 0.557759989 | 0.034318789 |
| BTRC      | 0.62402774  | 0 | 0 | 0.021420733 | MIOS      | 0.436120679 | 0.244984012 | 0.561734455 | 0.029927912 |
| WARS2     | 1.341243999 | 0 | 0 | 0.021433261 | VDAC3     | 1.042068973 | 0.588155097 | 0.56441091  | 0.031996439 |
| GLTP      | 0.410616777 | 0 | 0 | 0.021451694 | TAPBP     | 3.571990369 | 2.022995331 | 0.566349604 | 0.006060836 |
| GPR137B   | 0.843718293 | 0 | 0 | 0.021455974 | HIST1H2AC | 1.926194123 | 1.091137797 | 0.566473433 | 0.001233637 |
| WHAMM     | 0.285696114 | 0 | 0 | 0.021496339 | BTAF1     | 0.389465866 | 0.222469385 | 0.571216644 | 0.010580927 |
| NDUFB11   | 1.452459662 | 0 | 0 | 0.021531029 | MTMR9     | 0.845437229 | 0.483523244 | 0.571920927 | 0.039352683 |
| EMC7      | 1.137283136 | 0 | 0 | 0.021549958 | SRP54     | 0.237639677 | 0.138887527 | 0.584445867 | 0.045542729 |
| ZNF37A    | 0.243400477 | 0 | 0 | 0.021906332 | INTS8     | 0.735891743 | 0.430899918 | 0.585547972 | 0.012274513 |
| RAB11FIP4 | 2.029329974 | 0 | 0 | 0.021974358 | PANK3     | 1.081775137 | 0.642628728 | 0.594050192 | 0.043776699 |
| C1orf123  | 0.765809788 | 0 | 0 | 0.021997629 | PDS5B     | 1.177825251 | 0.705028721 | 0.598585164 | 0.045202948 |
| IDS       | 0.266411372 | 0 | 0 | 0.022129911 | ARPC3     | 0.172536745 | 0.103332776 | 0.59890301  | 0.0363195   |
| LAMB3     | 1.088158138 | 0 | 0 | 0.022198741 | EIF4G2    | 1.631607737 | 0.984251534 | 0.603240296 | 0.048261887 |
| APP       | 0.395526336 | 0 | 0 | 0.022337122 | LRCH1     | 0.87000119  | 0.534634688 | 0.614521789 | 0.019108118 |
| KCNC4     | 0.59196985  | 0 | 0 | 0.022341028 | HIST1H1C  | 13.13697557 | 8.083634201 | 0.615334493 | 0.010574701 |
| ELMOD2    | 1.615965957 | 0 | 0 | 0.022497944 | INTS10    | 1.117311714 | 0.690888723 | 0.618349127 | 0.037117854 |
| ARSA      | 1.783701694 | 0 | 0 | 0.02258139  | ZNF398    | 1.030754809 | 0.6379573   | 0.618922458 | 0.023542228 |
| TICRR     | 7.719176625 | 0 | 0 | 0.022600598 | HIST1H2AI | 16.21957238 | 10.07467292 | 0.621142943 | 0.009603707 |
| HKR1      | 0.065513385 | 0 | 0 | 0.022679867 | SETD7     | 0.831680323 | 0.520495544 | 0.625836069 | 0.025972691 |
| SLC8A1    | 2.80129934  | 0 | 0 | 0.022776865 | RCC1L     | 3.621565763 | 2.268042488 | 0.626260197 | 0.009920183 |
| TSC22D1   | 0.989019185 | 0 | 0 | 0.023001368 | NCAPD3    | 2.718342567 | 1.707887317 | 0.628282593 | 0.039411763 |
| DTWD1     | 0.099447121 | 0 | 0 | 0.023046555 | FKBP1A    | 0.649284643 | 0.409380613 | 0.630510235 | 0.004134721 |
| MED30     | 0.30688436  | 0 | 0 | 0.023058385 | FLT3      | 0.919639    | 0.585231199 | 0.636370575 | 0.014352296 |
| TNFSF10   | 1.599256801 | 0 | 0 | 0.023084921 | BTBD7     | 1.321895743 | 0.843694248 | 0.63824568  | 0.019104726 |
| MPV17     | 1.128988525 | 0 | 0 | 0.023178831 | DIDO1     | 0.701109425 | 1.073264568 | 1.530808929 | 0.011490345 |
| WDR92     | 0.956348866 | 0 | 0 | 0.023268372 | CFL1      | 0.7822979   | 1.20868022  | 1.545038303 | 0.038743469 |
| FUNDC2    | 1.027074996 | 0 | 0 | 0.02341616  | WWP2      | 1.587958023 | 2.511679642 | 1.581704054 | 0.009151501 |
| SUOX      | 1.242333558 | 0 | 0 | 0.023497312 | ATF6B     | 0.887408097 | 1.415004449 | 1.594536329 | 0.023978281 |
| TRIT1     | 0.287261826 | 0 | 0 | 0.023573161 | RAB27A    | 0.674345922 | 1.075496707 | 1.594873895 | 0.005496791 |
| DDX39B    | 0.142283492 | 0 | 0 | 0.023676804 | TOP1      | 0.360107195 | 0.578444411 | 1.606311729 | 0.004919043 |
| FANCF     | 1.009975696 | 0 | 0 | 0.023742828 | ATP1A1    | 2.251394723 | 3.621056278 | 1.60836136  | 0.000828623 |
| TIMM23    | 1.897286971 | 0 | 0 | 0.023826284 | BTF3      | 0.178227146 | 0.290893456 | 1.63215011  | 0.010031281 |
| RHOF      | 5.807131283 | 0 | 0 | 0.02390325  | PRPF4     | 1.100744451 | 1.808924333 | 1.643364481 | 0.024702773 |
| ARHGAP25  | 0.455075717 | 0 | 0 | 0.023924568 | ZMYND19   | 1.637273234 | 2.755024101 | 1.68269049  | 0.046592563 |
| MRPS17    | 1.706077653 | 0 | 0 | 0.024120757 | SPI1      | 0.989335379 | 1.665325    | 1.683276506 | 0.003599307 |
| TRADD     | 5.11823296  | 0 | 0 | 0.024120757 | SENP6     | 0.525963285 | 0.892519545 | 1.696923665 | 0.020575494 |
| ADCK2     | 10.23646592 | 0 | 0 | 0.024120757 | PHKA2     | 1.246324967 | 2.190668676 | 1.757702633 | 0.003483263 |
| NPEPL1    | 3.412155306 | 0 | 0 | 0.024120757 | PTOV1     | 4.168959954 | 7.369500388 | 1.767707167 | 0.009920436 |
| IL10RB    | 0.85061225  | 0 | 0 | 0.024132356 | METTL7B   | 3.744407882 | 6.801359385 | 1.816404516 | 0.020288296 |
| PIBF1     | 0.236940828 | 0 | 0 | 0.024343168 | DNAJC14   | 1.517033049 | 2.760705405 | 1.81980571  | 0.040174831 |
| USP53     | 0.436173607 | 0 | 0 | 0.024450492 | ARHGAP45  | 4.566292159 | 8.334531103 | 1.825229489 | 0.027690274 |
| FAM219B   | 0.509261    | 0 | 0 | 0.024524315 | GAB2      | 0.377776925 | 0.701425663 | 1.856719182 | 0.03133319  |
| SIRPB2    | 1.753603266 | 0 | 0 | 0.024735892 | ELAC2     | 1.20645796  | 2.24789269  | 1.863216759 | 0.022986356 |
| FBXO4     | 0.962353399 | 0 | 0 | 0.02481564  | PHRF1     | 1.680034765 | 3.170940339 | 1.88742543  | 0.019998066 |
| PDE8A     | 0.723063849 | 0 | 0 | 0.024897793 | FARSA     | 2.526044264 | 4.827676627 | 1.911160741 | 0.049848963 |
| POLM      | 2.157850819 | 0 | 0 | 0.025068635 | BOP1      | 5.5640946   | 10.75277155 | 1.932528529 | 0.040289093 |
| CDK5RAP1  | 0.423757489 | 0 | 0 | 0.025256802 | SAP30BP   | 0.316697266 | 0.625197228 | 1.974116278 | 0.015880408 |
| ZNF691    | 1.668028448 | 0 | 0 | 0.025330035 | SLC25A19  | 1.418802604 | 2.801327887 | 1.97443103  | 0.006756375 |
| SCAI      | 0.750918516 | 0 | 0 | 0.025517795 | AKT1      | 5.561814269 | 11.07384007 | 1.991048161 | 0.049502594 |
| MSI2      | 0.358500559 | 0 | 0 | 0.025706417 | PUM2      | 1.200187935 | 2.530368187 | 2.108309968 | 0.042001071 |

|          |             |   |   |             |          |             |             |             |             |
|----------|-------------|---|---|-------------|----------|-------------|-------------|-------------|-------------|
| CRELD2   | 2.207642362 | 0 | 0 | 0.025726118 | EXOSC10  | 0.381056519 | 0.804231786 | 2.110531498 | 0.006888624 |
| TMEM120A | 1.839701968 | 0 | 0 | 0.025726118 | PSMB4    | 1.615708253 | 3.434360741 | 2.12560698  | 0.000839987 |
| RNFT1    | 0.696139943 | 0 | 0 | 0.026019485 | SND1     | 0.729608692 | 1.554347186 | 2.130384688 | 0.009106042 |
| AZI2     | 0.359542043 | 0 | 0 | 0.026118706 | UTP18    | 0.947552627 | 2.026477469 | 2.138643714 | 0.014602646 |
| NLRP1    | 0.421367988 | 0 | 0 | 0.026132583 | CDC123   | 0.707207858 | 1.514483085 | 2.141496404 | 0.01865422  |
| MED21    | 0.712725695 | 0 | 0 | 0.026252826 | BIN3     | 1.227648364 | 2.632071434 | 2.143994576 | 0.033647877 |
| THAP12   | 0.409408386 | 0 | 0 | 0.026313692 | PRKCD    | 1.570636483 | 3.372116576 | 2.146974563 | 0.014124818 |
| ERMAP    | 0.388473226 | 0 | 0 | 0.026353119 | CAMTA2   | 0.676099879 | 1.460317688 | 2.159914139 | 0.015840925 |
| CRY2     | 0.879892077 | 0 | 0 | 0.026433687 | GPD2     | 1.75297242  | 3.78666023  | 2.160136798 | 0.00825088  |
| ZYG11A   | 1.468522021 | 0 | 0 | 0.026507809 | GALM     | 0.329155043 | 0.711268964 | 2.160893412 | 0.029823927 |
| ILIRN    | 1.661790118 | 0 | 0 | 0.026655907 | GBA2     | 1.18056769  | 2.554282936 | 2.16360566  | 0.039165561 |
| C9orf3   | 0.140206764 | 0 | 0 | 0.026757893 | ABTB2    | 2.184811721 | 4.771137073 | 2.183774935 | 0.034172828 |
| RNASEL   | 0.901788671 | 0 | 0 | 0.026807031 | PLSCR1   | 0.422486247 | 0.938200884 | 2.220666094 | 0.030842667 |
| FAM76B   | 0.471221072 | 0 | 0 | 0.026863066 | TRAFD1   | 1.021426779 | 2.295037791 | 2.246894088 | 0.016418375 |
| TMEM116  | 0.279437331 | 0 | 0 | 0.027112346 | MTMR6    | 1.103735226 | 2.506516437 | 2.270939966 | 0.026085166 |
| ZNF699   | 0.385565421 | 0 | 0 | 0.027336442 | STAT5A   | 1.247697932 | 2.853993454 | 2.287407377 | 0.038800022 |
| C1GALT1  | 0.708825098 | 0 | 0 | 0.027396809 | LPCAT4   | 1.86177737  | 4.502317809 | 2.418290114 | 0.013094723 |
| SOCS3    | 2.209988781 | 0 | 0 | 0.027630726 | RET      | 1.583688054 | 3.885244992 | 2.453289322 | 0.031046563 |
| BCKDHB   | 1.068328935 | 0 | 0 | 0.027980474 | USP36    | 0.86228     | 2.124641413 | 2.463980857 | 0.018901045 |
| TEF      | 5.013065654 | 0 | 0 | 0.028087088 | EIF2AK3  | 0.863906481 | 2.236328692 | 2.588623585 | 0.018630301 |
| C6orf48  | 0.014764735 | 0 | 0 | 0.028154577 | RGS19    | 8.602893141 | 22.27575573 | 2.589333073 | 0.022909098 |
| PNPLA8   | 1.152690181 | 0 | 0 | 0.028197595 | CNTROB   | 0.692300753 | 1.833613119 | 2.648578831 | 0.012033287 |
| C21orf91 | 0.816115416 | 0 | 0 | 0.028239839 | PLCG2    | 0.649115323 | 1.730750909 | 2.666322682 | 0.024246283 |
| TRAPPC4  | 3.697095605 | 0 | 0 | 0.028317092 | TAF2     | 1.274378296 | 3.420792529 | 2.684283419 | 0.026433434 |
| MPZL1    | 4.355201749 | 0 | 0 | 0.028395023 | CLPB     | 2.907613571 | 7.807656295 | 2.685245513 | 0.030198559 |
| IER3IP1  | 2.356855844 | 0 | 0 | 0.028404485 | APLP2    | 0.648727035 | 1.761364353 | 2.715108602 | 0.013183257 |
| NUP85    | 0.912157044 | 0 | 0 | 0.028770066 | SPNS3    | 1.192249434 | 3.280022744 | 2.751121242 | 0.009664487 |
| CDR2L    | 3.127395579 | 0 | 0 | 0.028770066 | USP16    | 0.518180481 | 1.434555294 | 2.768447185 | 0.009556065 |
| COX17    | 0.070147348 | 0 | 0 | 0.028868862 | CCDC32   | 0.835738963 | 2.314817619 | 2.769785449 | 0.047788786 |
| TULP3    | 1.295496308 | 0 | 0 | 0.028910892 | MELTF    | 1.204423774 | 3.33868082  | 2.772015043 | 0.039504891 |
| KIAA2026 | 0.249423686 | 0 | 0 | 0.029111472 | CERK     | 1.401854235 | 3.909081541 | 2.788507852 | 0.01195807  |
| UOCR11   | 6.051985625 | 0 | 0 | 0.029186831 | DPY19L1  | 1.455786592 | 4.127742629 | 2.835403659 | 0.026773148 |
| EEF1B2   | 0.049085521 | 0 | 0 | 0.029289303 | COMMD5   | 3.808718601 | 10.81783906 | 2.840283096 | 0.021508081 |
| ATG4A    | 0.662283585 | 0 | 0 | 0.029393991 | SLC9A8   | 0.571602156 | 1.633784677 | 2.858254924 | 0.02732404  |
| PSPN     | 3.665326266 | 0 | 0 | 0.029447948 | USE1     | 0.856171887 | 2.57429504  | 3.006750256 | 0.016602313 |
| ZNF524   | 1.680431185 | 0 | 0 | 0.029562451 | PGD      | 0.806864997 | 2.440696668 | 3.024913309 | 0.025279528 |
| NFIL3    | 0.241852391 | 0 | 0 | 0.029819426 | WARS     | 0.322763628 | 0.981406259 | 3.040634613 | 0.002068232 |
| NAPB     | 0.254801209 | 0 | 0 | 0.0298685   | SCRIB    | 4.591847229 | 14.04785703 | 3.059304095 | 0.037863457 |
| C1orf52  | 0.356299635 | 0 | 0 | 0.029948942 | RBM45    | 0.698870241 | 2.141897173 | 3.064799511 | 0.042513983 |
| ZNF280C  | 0.518802944 | 0 | 0 | 0.029953041 | ZSWIM8   | 0.853317216 | 2.618451247 | 3.068555512 | 0.032538583 |
| CIB1     | 3.806779726 | 0 | 0 | 0.029961137 | DHX16    | 0.474851007 | 1.466301027 | 3.087918116 | 0.026018609 |
| ARHGAP33 | 1.745596715 | 0 | 0 | 0.030008143 | TSNS54   | 2.805489215 | 8.68906266  | 3.097164877 | 0.019704406 |
| PIGL     | 0.200820072 | 0 | 0 | 0.03006283  | SPPL2B   | 0.818962278 | 2.571920637 | 3.140462883 | 0.029994171 |
| BTN2A1   | 0.246890753 | 0 | 0 | 0.030098305 | MYL12B   | 0.202779724 | 0.644569651 | 3.178669141 | 0.049991545 |
| ATP8B2   | 2.566191927 | 0 | 0 | 0.030136205 | RNF167   | 2.193521374 | 7.034079317 | 3.20675212  | 0.007790893 |
| PCGF1    | 0.196495339 | 0 | 0 | 0.030165063 | LONP1    | 0.503069711 | 1.647274073 | 3.274444947 | 0.015395317 |
| DEPTOR   | 0.537048267 | 0 | 0 | 0.030307706 | LMNB1    | 1.429814605 | 4.739666358 | 3.314881763 | 0.034506899 |
| UAP1     | 1.827148451 | 0 | 0 | 0.030595947 | ATAD1    | 0.813834804 | 2.705407348 | 3.32427089  | 0.0155177   |
| ABHD10   | 1.047170987 | 0 | 0 | 0.030771472 | MYBBP1A  | 0.866292236 | 2.88119223  | 3.325889475 | 0.008175582 |
| MALSU1   | 0.439828866 | 0 | 0 | 0.030860495 | MTO1     | 1.741317864 | 5.860194318 | 3.365378854 | 0.010619853 |
| GAMT     | 12.80622911 | 0 | 0 | 0.030877167 | MT-CO1   | 0.020461273 | 0.068978881 | 3.371192056 | 0.016179422 |
| COX18    | 0.375287142 | 0 | 0 | 0.030994974 | SLC3A2   | 0.859679918 | 2.903673472 | 3.377621614 | 0.01061592  |
| RRAGA    | 0.713544122 | 0 | 0 | 0.031010352 | MT-ND1   | 0.03455747  | 0.118318833 | 3.423827989 | 0.006748734 |
| RP2      | 2.330150738 | 0 | 0 | 0.031120679 | TRIM41   | 0.320717114 | 1.099040873 | 3.426823281 | 0.043009896 |
| KLHDC4   | 0.636147849 | 0 | 0 | 0.031132201 | ADRM1    | 6.146597153 | 21.1020854  | 3.43313298  | 0.049053192 |
| ZBTB8OS  | 0.098425477 | 0 | 0 | 0.03120763  | HAUS5    | 2.78064032  | 9.708585494 | 3.491492741 | 0.033464286 |
| DRAP1    | 0.481535778 | 0 | 0 | 0.031255245 | CYTH2    | 0.392850212 | 1.408910321 | 3.586380452 | 0.017397603 |
| F11R     | 0.839526768 | 0 | 0 | 0.031355862 | TLE3     | 0.782822176 | 2.810741579 | 3.590523704 | 0.042634862 |
| C11orf54 | 0.195827683 | 0 | 0 | 0.031479065 | ZNF512B  | 1.76582586  | 6.464104889 | 3.660669512 | 0.018479757 |
| DHFR     | 1.923399225 | 0 | 0 | 0.031523277 | PPM1D    | 0.931289735 | 3.424632586 | 3.677300906 | 0.028387694 |
| ANKAR    | 0.455428423 | 0 | 0 | 0.031752657 | ARHGAP27 | 2.623928703 | 9.65484434  | 3.679537607 | 0.024471664 |

|          |             |   |   |             |          |             |             |             |             |
|----------|-------------|---|---|-------------|----------|-------------|-------------|-------------|-------------|
| RYBP     | 1.307411209 | 0 | 0 | 0.032290303 | RRP9     | 1.439606801 | 5.297622034 | 3.679909007 | 0.006622529 |
| ST3GAL6  | 0.327152185 | 0 | 0 | 0.032303951 | MT-ND5   | 0.053501193 | 0.202448703 | 3.784003527 | 0.04457032  |
| ADSL     | 1.040210755 | 0 | 0 | 0.032864178 | SETD4    | 0.123813385 | 0.485765023 | 3.923364368 | 0.015001392 |
| RCOR3    | 0.505963292 | 0 | 0 | 0.033102822 | FBXO41   | 1.852597511 | 7.293314841 | 3.936804836 | 0.036994263 |
| GIN1     | 0.455048152 | 0 | 0 | 0.033715966 | PIAS4    | 1.381667902 | 5.576349911 | 4.035955314 | 0.001033165 |
| PPFIA4   | 0.436534614 | 0 | 0 | 0.0338343   | HSPBP1   | 6.99338779  | 29.21564343 | 4.177609523 | 0.001200694 |
| ZNF286A  | 0.830817457 | 0 | 0 | 0.033969506 | ERCC1    | 0.395307283 | 1.675219355 | 4.237764967 | 0.016080959 |
| ONECUT2  | 1.94043974  | 0 | 0 | 0.034089979 | MORC2    | 0.359396475 | 1.54676437  | 4.303782807 | 0.009957881 |
| CREBRF   | 0.370761862 | 0 | 0 | 0.034301226 | GPANK1   | 0.417616721 | 1.799712984 | 4.309484974 | 0.036504891 |
| TMEM258  | 0.212519932 | 0 | 0 | 0.034544647 | S1PR3    | 4.752840737 | 20.55573602 | 4.324936845 | 0.008146877 |
| CERS5    | 0.887597677 | 0 | 0 | 0.034585421 | RAP1GAP2 | 1.275154904 | 5.596487722 | 4.388868917 | 0.026327777 |
| SLC25A23 | 2.226370206 | 0 | 0 | 0.034597988 | TEFM     | 0.406914663 | 1.802081538 | 4.428647335 | 0.012643831 |
| MED28    | 0.483944092 | 0 | 0 | 0.034599528 | ADA2     | 0.995503405 | 4.427896438 | 4.447896829 | 0.019692756 |
| DENND6A  | 0.592584708 | 0 | 0 | 0.034604383 | NTMT1    | 1.310986175 | 5.891925198 | 4.494269513 | 0.024388107 |
| TBCEL    | 0.476697937 | 0 | 0 | 0.034872016 | HIP1     | 0.760499766 | 3.419417375 | 4.496276696 | 0.009358843 |
| RIN2     | 0.934903147 | 0 | 0 | 0.03490273  | PKP4     | 0.853511403 | 3.902524097 | 4.572316296 | 0.012076306 |
| HIST2H4B | 2.891051296 | 0 | 0 | 0.035033072 | DDX51    | 1.379833185 | 6.359553847 | 4.608929482 | 0.006488017 |
| DRG2     | 1.242376766 | 0 | 0 | 0.035334647 | RPL37A   | 0.16373622  | 0.778637755 | 4.755439908 | 0.004115598 |
| AURKAIP1 | 0.93267087  | 0 | 0 | 0.035339179 | PMF1     | 2.036785724 | 9.848886967 | 4.835504713 | 0.031337181 |
| HHAT     | 0.843827474 | 0 | 0 | 0.035561593 | EXT2     | 2.869983396 | 14.00957065 | 4.881411742 | 0.047712936 |
| AP1S2    | 0.725521778 | 0 | 0 | 0.035675115 | MAPK8    | 0.347350622 | 1.738971101 | 5.006385453 | 0.033469089 |
| FAM213B  | 3.98653397  | 0 | 0 | 0.035830578 | AP1S1    | 2.327646574 | 11.65652227 | 5.007857464 | 0.005516992 |
| EXOSC1   | 0.622997352 | 0 | 0 | 0.03603003  | CCT7     | 3.049117564 | 15.34303671 | 5.031959702 | 0.006280179 |
| DCP1B    | 1.474403893 | 0 | 0 | 0.036467029 | TNKS1BP1 | 0.394916639 | 2.005197937 | 5.077522036 | 0.027035067 |
| KCTD15   | 2.235314277 | 0 | 0 | 0.036472043 | TCOF1    | 1.476399213 | 7.570749839 | 5.127847382 | 0.015714782 |
| CTSF     | 5.815245719 | 0 | 0 | 0.036638671 | PIGO     | 10.67111293 | 55.44071893 | 5.195401763 | 0.039647219 |
| TMEM241  | 1.559529816 | 0 | 0 | 0.037007162 | ZNF226   | 0.100896474 | 0.567245653 | 5.622056257 | 0.003755709 |
| RAB28    | 0.610466902 | 0 | 0 | 0.037219778 | PTPMT1   | 1.176226609 | 6.95990147  | 5.917143361 | 0.004874748 |
| GAS2L3   | 1.424422772 | 0 | 0 | 0.037219778 | RRNAD1   | 1.952868539 | 11.91604011 | 6.101813753 | 0.019278386 |
| DYRK4    | 0.424407174 | 0 | 0 | 0.037224208 | EXOSC7   | 0.288066537 | 1.773268134 | 6.155758848 | 0.042253664 |
| IFT52    | 0.73716573  | 0 | 0 | 0.037372202 | UOCC2    | 0.721718351 | 4.731617335 | 6.556044097 | 0.003382317 |
| RIPK3    | 1.886520716 | 0 | 0 | 0.037408936 | FAM50A   | 0.373286025 | 2.560704142 | 6.85989823  | 0.018854113 |
| HINT3    | 0.490433762 | 0 | 0 | 0.037561051 | TRMT61A  | 6.831329814 | 47.68284053 | 6.980023191 | 0.04195329  |
| RBKS     | 0.448973426 | 0 | 0 | 0.037851363 | EEF1A2   | 1.080280296 | 8.201890364 | 7.592372456 | 0.010803826 |
| TAF5     | 1.427791327 | 0 | 0 | 0.037892256 | ZC3H8    | 0.040618847 | 0.318588183 | 7.843358601 | 0.024744427 |
| BSDC1    | 0.701288716 | 0 | 0 | 0.038087132 | HDLBP    | 2.165025276 | 17.01138075 | 7.85735896  | 0.04127303  |
| RBM18    | 1.539806475 | 0 | 0 | 0.03839604  | ATG10    | 0.21543033  | 1.831245954 | 8.500409176 | 0.04520059  |
| ZNF136   | 0.51041714  | 0 | 0 | 0.038400955 | JDP2     | 0.067497754 | 0.582691995 | 8.632761247 | 0.034496795 |
| EAF2     | 0.353130713 | 0 | 0 | 0.038589101 | DPH7     | 0.535516902 | 5.118599673 | 9.55824112  | 0.001227332 |
| ZNF296   | 3.559303404 | 0 | 0 | 0.038763137 | TAP2     | 0.590585699 | 5.752108063 | 9.739667033 | 0.013196921 |
| ZNF543   | 0.378764527 | 0 | 0 | 0.038823439 | EHD2     | 0.808062938 | 8.582538228 | 10.62112594 | 0.019979007 |
| ADAP1    | 10.74414164 | 0 | 0 | 0.038845652 | RCN1     | 0.056526909 | 0.601702378 | 10.64452999 | 0.0272391   |
| TRMT112  | 0.360917337 | 0 | 0 | 0.038930579 | KCTD13   | 0.527991523 | 6.358824348 | 12.04342129 | 0.049684686 |
| RNF141   | 0.497603971 | 0 | 0 | 0.039103431 | MX2      | 0.311465538 | 4.278930476 | 13.73805431 | 0.028559035 |
| PARS2    | 2.633706966 | 0 | 0 | 0.039117587 | HECTD3   | 0.269287913 | 3.914833801 | 14.53772565 | 0.009871839 |
| SMYD5    | 3.497535165 | 0 | 0 | 0.039187718 | RTL5     | 0.085038288 | 1.68688176  | 19.83673237 | 0.003212687 |
| TBCK     | 0.29527486  | 0 | 0 | 0.039215415 | OCEL1    | 0.190085586 | 4.485763243 | 23.59865015 | 0.0185025   |
| PAM      | 0.507768201 | 0 | 0 | 0.039365638 | LGALS12  | 0.369309138 | 16.2157308  | 43.90828477 | 0.009933997 |
| CD82     | 0.774801076 | 0 | 0 | 0.039760681 | ADAMTSL5 | 0           | 14.05349714 | #DIV/0!     | 0.020008502 |
| COMMD8   | 0.393730526 | 0 | 0 | 0.039762727 |          |             |             |             |             |

**Supplemental Table 7. The GO biological process analysis of the genes whose translational efficiency were changed upon circMYBL2 knockdown.**

| GO_Term    | GO biological process complete                                         | P-value  | FDR      |
|------------|------------------------------------------------------------------------|----------|----------|
| GO:0044237 | cellular metabolic process                                             | 3.50E-18 | 5.53E-14 |
| GO:0008152 | metabolic process                                                      | 1.25E-17 | 9.90E-14 |
| GO:0044238 | primary metabolic process                                              | 1.00E-16 | 5.29E-13 |
| GO:0006807 | nitrogen compound metabolic process                                    | 3.32E-16 | 1.31E-12 |
| GO:0071704 | organic substance metabolic process                                    | 4.04E-16 | 1.28E-12 |
| GO:0044260 | cellular macromolecule metabolic process                               | 1.82E-15 | 4.79E-12 |
| GO:0043170 | macromolecule metabolic process                                        | 3.79E-15 | 8.57E-12 |
| GO:0050906 | detection of stimulus involved in sensory perception                   | 2.14E-14 | 4.23E-11 |
| GO:0007186 | G protein-coupled receptor signaling pathway                           | 1.42E-13 | 2.49E-10 |
| GO:0051606 | detection of stimulus                                                  | 2.42E-13 | 3.82E-10 |
| GO:0050907 | detection of chemical stimulus involved in sensory perception          | 8.66E-13 | 1.25E-09 |
| GO:0007606 | sensory perception of chemical stimulus                                | 9.82E-13 | 1.29E-09 |
| GO:0050877 | nervous system process                                                 | 2.32E-12 | 2.82E-09 |
| GO:0008150 | biological_process                                                     | 2.95E-12 | 3.34E-09 |
| GO:0009593 | detection of chemical stimulus                                         | 3.52E-12 | 3.48E-09 |
| GO:0034641 | cellular nitrogen compound metabolic process                           | 3.80E-12 | 3.54E-09 |
| GO:0050911 | detection of chemical stimulus involved in sensory perception of smell | 1.38E-11 | 1.21E-08 |
| GO:0007608 | sensory perception of smell                                            | 7.85E-11 | 6.54E-08 |
| GO:0006139 | nucleobase-containing compound metabolic process                       | 8.47E-11 | 6.69E-08 |
| GO:0090304 | nucleic acid metabolic process                                         | 9.35E-11 | 7.04E-08 |
| GO:0044267 | cellular protein metabolic process                                     | 1.46E-10 | 1.05E-07 |
| GO:0007600 | sensory perception                                                     | 2.47E-10 | 1.70E-07 |
| GO:0046483 | heterocycle metabolic process                                          | 4.30E-10 | 2.83E-07 |
| GO:0006725 | cellular aromatic compound metabolic process                           | 1.91E-09 | 1.21E-06 |
| GO:0003008 | system process                                                         | 2.59E-09 | 1.57E-06 |
| GO:0044249 | cellular biosynthetic process                                          | 2.90E-09 | 1.70E-06 |
| GO:0043412 | macromolecule modification                                             | 3.14E-09 | 1.77E-06 |
| GO:0006464 | cellular protein modification process                                  | 3.99E-09 | 2.18E-06 |
| GO:0036211 | protein modification process                                           | 3.99E-09 | 2.10E-06 |
| GO:1901360 | organic cyclic compound metabolic process                              | 4.40E-09 | 2.25E-06 |
| GO:1901564 | organonitrogen compound metabolic process                              | 6.42E-09 | 3.17E-06 |
| GO:1901576 | organic substance biosynthetic process                                 | 1.44E-08 | 6.91E-06 |
| GO:0009058 | biosynthetic process                                                   | 1.49E-08 | 6.93E-06 |
| GO:0009987 | cellular process                                                       | 5.75E-08 | 2.60E-05 |
| GO:0019538 | protein metabolic process                                              | 1.32E-07 | 5.79E-05 |
| GO:0019222 | regulation of metabolic process                                        | 3.08E-07 | 1.32E-04 |
| GO:0006996 | organelle organization                                                 | 3.91E-07 | 1.63E-04 |
| GO:0010468 | regulation of gene expression                                          | 4.90E-07 | 1.99E-04 |
| GO:0032501 | multicellular organismal process                                       | 8.61E-07 | 3.40E-04 |

|            |                                                                |          |          |
|------------|----------------------------------------------------------------|----------|----------|
| GO:0031323 | regulation of cellular metabolic process                       | 1.78E-06 | 6.88E-04 |
| GO:0034645 | cellular macromolecule biosynthetic process                    | 1.79E-06 | 6.74E-04 |
| GO:0006974 | cellular response to DNA damage stimulus                       | 2.36E-06 | 8.69E-04 |
| GO:0009059 | macromolecule biosynthetic process                             | 2.52E-06 | 9.04E-04 |
| GO:0006399 | tRNA metabolic process                                         | 2.64E-06 | 9.28E-04 |
| GO:0016070 | RNA metabolic process                                          | 3.83E-06 | 1.32E-03 |
| GO:0060255 | regulation of macromolecule metabolic process                  | 4.21E-06 | 1.42E-03 |
| GO:0033554 | cellular response to stress                                    | 5.09E-06 | 1.68E-03 |
| GO:0006259 | DNA metabolic process                                          | 5.24E-06 | 1.69E-03 |
| GO:0051276 | chromosome organization                                        | 7.10E-06 | 2.25E-03 |
| GO:0016567 | protein ubiquitination                                         | 7.13E-06 | 2.21E-03 |
| GO:0032446 | protein modification by small protein conjugation              | 9.63E-06 | 2.93E-03 |
| GO:0070647 | protein modification by small protein conjugation or removal   | 9.93E-06 | 2.96E-03 |
| GO:0010467 | gene expression                                                | 1.07E-05 | 3.14E-03 |
| GO:0009889 | regulation of biosynthetic process                             | 1.29E-05 | 3.72E-03 |
| GO:0031326 | regulation of cellular biosynthetic process                    | 1.34E-05 | 3.78E-03 |
| GO:2000112 | regulation of cellular macromolecule biosynthetic process      | 1.38E-05 | 3.84E-03 |
| GO:0006793 | phosphorus metabolic process                                   | 1.41E-05 | 3.84E-03 |
| GO:0006796 | phosphate-containing compound metabolic process                | 1.56E-05 | 4.19E-03 |
| GO:0044271 | cellular nitrogen compound biosynthetic process                | 1.84E-05 | 4.84E-03 |
| GO:0007049 | cell cycle                                                     | 2.04E-05 | 5.29E-03 |
| GO:0019219 | regulation of nucleobase-containing compound metabolic process | 2.04E-05 | 5.21E-03 |
| GO:0010556 | regulation of macromolecule biosynthetic process               | 2.05E-05 | 5.14E-03 |
| GO:0080090 | regulation of primary metabolic process                        | 3.82E-05 | 9.43E-03 |
| GO:0034660 | ncRNA metabolic process                                        | 4.98E-05 | 1.21E-02 |
| GO:0051252 | regulation of RNA metabolic process                            | 5.69E-05 | 1.36E-02 |
| GO:0071840 | cellular component organization or biogenesis                  | 7.01E-05 | 1.66E-02 |
| GO:0006270 | DNA replication initiation                                     | 9.50E-05 | 2.21E-02 |
| GO:0051171 | regulation of nitrogen compound metabolic process              | 9.66E-05 | 2.22E-02 |
| GO:0006325 | chromatin organization                                         | 1.17E-04 | 2.64E-02 |
| GO:0007155 | cell adhesion                                                  | 1.39E-04 | 3.10E-02 |
| GO:0022610 | biological adhesion                                            | 1.41E-04 | 3.10E-02 |
| GO:0044248 | cellular catabolic process                                     | 1.47E-04 | 3.18E-02 |
| GO:0051301 | cell division                                                  | 1.47E-04 | 3.14E-02 |
| GO:0006281 | DNA repair                                                     | 1.83E-04 | 3.86E-02 |
| GO:1903506 | regulation of nucleic acid-templated transcription             | 2.03E-04 | 4.22E-02 |
| GO:0007005 | mitochondrion organization                                     | 2.31E-04 | 4.75E-02 |
| GO:2001141 | regulation of RNA biosynthetic process                         | 2.39E-04 | 4.84E-02 |

**Supplemental Table 8. Proteins identified in specific bands by MS may interact with circMYBL2.**

| Protein  | Pipette Number | Unique | Protein   | Pipette Number | Unique | Protein   | Pipette Number | Unique |
|----------|----------------|--------|-----------|----------------|--------|-----------|----------------|--------|
| VPS13D   | 1              | 1      | TUBA3C    | 1              | 1      | SYNCRIP   | 8              | 8      |
| AKAP13   | 1              | 1      | FAM90A14P | 1              | 1      | EZR       | 12             | 12     |
| ACACA    | 1              | 1      | TRPM7     | 1              | 1      | ALB       | 14             | 10     |
| DHX9     | 14             | 14     | PLXNB2    | 1              | 1      | CRY1      | 1              | 1      |
| SF3B3    | 9              | 9      | ZSWIM8    | 1              | 1      | NELFCD    | 1              | 1      |
| DHX30    | 8              | 8      | LAMB4     | 1              | 1      | PTBP1     | 10             | 8      |
| SND1     | 8              | 8      | PCF11     | 1              | 1      | KRT1      | 26             | 16     |
| DDX17    | 2              | 2      | PCF11     | 1              | 1      | ME2       | 11             | 11     |
| NCL      | 19             | 19     | CCDC18    | 1              | 1      | KRT2      | 10             | 3      |
| SEMA7A   | 1              | 1      | CLIP1     | 1              | 1      | HNRNPL    | 2              | 2      |
| HNRNPR   | 6              | 1      | TNS3      | 1              | 1      | CES1      | 3              | 3      |
| SYNCRIP  | 9              | 4      | RECQL4    | 1              | 1      | KRT5      | 6              | 2      |
| ALB      | 8              | 5      | PTCH2     | 1              | 1      | PGM5      | 1              | 1      |
| AMY1A    | 1              | 1      | KIF1C     | 1              | 1      | KRT9      | 16             | 15     |
| THNSL2   | 1              | 1      | WDR6      | 3              | 3      | MCCC2     | 30             | 29     |
| TRAF4    | 1              | 1      | MAP4      | 1              | 1      | NUP58     | 1              | 1      |
| EEF1A1P5 | 6              | 6      | EPHA6     | 1              | 1      | TCP1      | 12             | 12     |
| EEF1A1   | 6              | 6      | ATP1A4    | 1              | 1      | CAT       | 1              | 1      |
| WDR12    | 1              | 1      | ATP1A1    | 1              | 1      | CCT5      | 3              | 3      |
| ENO1     | 4              | 4      | ATP1A2    | 1              | 1      | CCT8      | 24             | 24     |
| SSB      | 2              | 2      | ATP1A3    | 1              | 1      | CCT7      | 10             | 10     |
| NSUN4    | 1              | 1      | ZNF316    | 1              | 1      | YARS      | 12             | 12     |
| RTCA     | 1              | 1      | KCNQ5     | 1              | 1      | cKRT10    | 17             | 14     |
| S100A9   | 2              | 2      | EEF2      | 6              | 6      | CCT6A     | 1              | 1      |
| ILF2     | 7              | 5      | KANK2     | 1              | 1      | PKM       | 3              | 3      |
| DST      | 1              | 1      | HNRNPU    | 8              | 8      | KRT14     | 4              | 1      |
| PCLO     | 1              | 1      | DDX21     | 10             | 10     | KRT16     | 4              | 1      |
| SSPO     | 1              | 1      | NSUN2     | 1              | 1      | EEF1A2    | 1              | 1      |
| HERC2    | 1              | 1      | MPO       | 12             | 12     | EEF1A1P5  | 1              | 1      |
| AKAP13   | 1              | 1      | ADARB2    | 1              | 1      | TUBA1B    | 1              | 1      |
| PDZD2    | 1              | 1      | CLPB      | 2              | 2      | CPOX      | 1              | 1      |
| ACACA    | 2              | 2      | UBC       | 1              | 1      | EEF1A1    | 1              | 1      |
| RP1L1    | 1              | 1      | NCL       | 32             | 31     | TUBA1A    | 1              | 1      |
| NAV3     | 1              | 1      | SYN1      | 1              | 1      | TUBA8     | 1              | 1      |
| DOCK6    | 1              | 1      | HSPA8     | 1              | 1      | FAM90A2P  | 1              | 1      |
| ADAMTS9  | 1              | 1      | NXF1      | 5              | 5      | FAM90A20P | 1              | 1      |
| TUBA4A   | 1              | 1      | HBA1      | 1              | 1      | VPS13D    | 1              | 1      |



|           |   |   |           |    |   |          |    |    |
|-----------|---|---|-----------|----|---|----------|----|----|
| FAM90A23P | 1 | 1 | UBA52     | 1  | 1 | ILF3     | 1  | 1  |
| TUBA1C    | 1 | 1 | HIST1H2BA | 1  | 1 | NSUN2    | 1  | 1  |
| FAM90A15P | 1 | 1 | HIST1H2BM | 1  | 1 | NCL      | 5  | 5  |
| FAM90A22P | 1 | 1 | HIST1H2BL | 1  | 1 | ALB      | 5  | 5  |
| TUBA3E    | 1 | 1 | HIST1H2BB | 1  | 1 | KRT1     | 7  | 7  |
| FAM90A13P | 1 | 1 | H2BFS     | 1  | 1 | KRT9     | 3  | 3  |
| FAM90A5P  | 1 | 1 | HIST1H2BD | 1  | 1 | TCP1     | 1  | 1  |
| FAM90A24P | 1 | 1 | HIST1H2BN | 1  | 1 | KRT10    | 5  | 5  |
| FAM90A7P  | 1 | 1 | HIST2H2BE | 1  | 1 | CCT4     | 1  | 1  |
| FAM90A1   | 1 | 1 | HIST2H2BF | 1  | 1 | EEF1A2   | 2  | 2  |
| FAM90A12P | 1 | 1 | HIST3H2BB | 1  | 1 | EEF1A1P5 | 2  | 2  |
| FAM90A16P | 1 | 1 | HIST1H2BC | 1  | 1 | EEF1A1   | 2  | 2  |
| FAM90A9P  | 1 | 1 | HIST1H2BO | 1  | 1 | NSUN4    | 1  | 1  |
| FAM90A18P | 1 | 1 | HIST1H2BJ | 1  | 1 | YBX3     | 1  | 1  |
| FAM90A8P  | 1 | 1 | HIST1H2BH | 1  | 1 | HNRNPA1  | 4  | 4  |
| FAM90A10P | 1 | 1 | HIST1H2BK | 1  | 1 | YBX2     | 1  | 1  |
| HS3ST3A1  | 1 | 1 | NEDD8     | 1  | 1 | YBX1     | 1  | 1  |
| FOXD4L1   | 1 | 1 | ILF3      | 4  | 4 | YWHAE    | 1  | 1  |
| NSUN4     | 1 | 1 | HNRNPU    | 2  | 2 | CTSG     | 1  | 1  |
| ACTA1     | 4 | 4 | NSUN2     | 2  | 2 | ELANE    | 1  | 1  |
| ACTC1     | 4 | 4 | KHSRP     | 1  | 1 | YWHAG    | 1  | 1  |
| ACTA2     | 4 | 4 | ALB       | 9  | 6 | YWHAH    | 1  | 1  |
| ACTG2     | 4 | 4 | KRT1      | 10 | 6 | YWHAB    | 1  | 1  |
| ACTG1     | 4 | 4 | KRT2      | 7  | 4 | C6orf62  | 1  | 1  |
| ACTB      | 4 | 4 | HNRNPL    | 1  | 1 | PRSS1    | 1  | 1  |
| OR56B4    | 1 | 1 | KRT5      | 1  | 1 | UBB      | 1  | 1  |
| MAPRE3    | 1 | 1 | KRT9      | 3  | 3 | SFN      | 1  | 1  |
| APOA1     | 1 | 1 | CCT3      | 9  | 9 | YWHAQ    | 1  | 1  |
| CELA2A    | 1 | 1 | KRT10     | 7  | 7 | YWHAZ    | 1  | 1  |
| CELA2B    | 1 | 1 | AMY1A     | 1  | 1 | ANP32B   | 1  | 1  |
| RPS27A    | 1 | 1 | AK2       | 1  | 1 | IGF2BP2  | 16 | 13 |

**Supplemental Table 9. Proteins identified in whole eluted proteins by MS may specifically interact with circMYBL2 compared to tRSA-NC.**

| Protein  | NC Peptide | circMYBL2 Peptide | Protein  | NC Peptide | circMYBL2 Peptide | Protein   | NC Peptide | circMYBL2 Peptide |
|----------|------------|-------------------|----------|------------|-------------------|-----------|------------|-------------------|
| CCT8     | 0          | 13                | PGAM5    | 0          | 3                 | TACC2     | 0          | 1                 |
| SF3B3    | 0          | 13                | NAT10    | 0          | 2                 | HLCS      | 0          | 1                 |
| TOP2B    | 0          | 20                | RPS9     | 0          | 2                 | KRI1      | 0          | 1                 |
| CCT3     | 0          | 10                | RPL7     | 0          | 2                 | RCC2      | 0          | 1                 |
| CCT7     | 0          | 8                 | RPS3A    | 0          | 2                 | SUSD5     | 0          | 1                 |
| HIST1H1E | 0          | 6                 | MATR3    | 0          | 1                 | SPATA1    | 0          | 1                 |
| RARS     | 0          | 7                 | SON      | 0          | 1                 | CTCF      | 0          | 1                 |
| PUS7     | 0          | 7                 | SNRPD3   | 0          | 1                 | MUC16     | 0          | 1                 |
| IARS     | 0          | 8                 | EIF3B    | 0          | 2                 | DDX21     | 1          | 14                |
| TCP1     | 0          | 8                 | DDX23    | 0          | 2                 | YBX1      | 1          | 9                 |
| IGF2BP2  | 0          | 8                 | HP1BP3   | 0          | 2                 | ACLY      | 2          | 15                |
| TOP1     | 0          | 9                 | LMNA     | 0          | 2                 | IGF2BP1   | 1          | 6                 |
| EEF1G    | 0          | 6                 | RPP38    | 0          | 2                 | SND1      | 3          | 15                |
| CCT2     | 0          | 9                 | MYBBP1A  | 0          | 1                 | HNRNPL    | 1          | 5                 |
| CCT6A    | 0          | 8                 | RPN1     | 0          | 2                 | HIST1H1B  | 1          | 5                 |
| LARS     | 0          | 7                 | WDR4     | 0          | 1                 | EIF2S1    | 1          | 5                 |
| SRSF3    | 0          | 4                 | FARSB    | 0          | 2                 | HNRNPUL2  | 1          | 5                 |
| NARS     | 0          | 8                 | EIF3A    | 0          | 2                 | EPRS      | 3          | 12                |
| HNRNPDL  | 0          | 4                 | AP2A2    | 0          | 1                 | HNRNPA3   | 1          | 4                 |
| FUBP1    | 0          | 6                 | AP2A1    | 0          | 1                 | STRBP     | 2          | 7                 |
| CCT4     | 0          | 6                 | SF3B2    | 0          | 2                 | IQGAP1    | 3          | 10                |
| YARS     | 0          | 10                | CPSF1    | 0          | 1                 | ZFR       | 4          | 12                |
| PDCD11   | 0          | 10                | RTCB     | 0          | 2                 | DDX6      | 3          | 9                 |
| EFTUD2   | 0          | 6                 | PRKRA    | 0          | 1                 | FAM120A   | 3          | 9                 |
| CCT5     | 0          | 7                 | SMC1A    | 0          | 2                 | ADAR      | 1          | 3                 |
| KARS     | 0          | 7                 | SNRPB    | 0          | 2                 | HIST1H2BH | 1          | 3                 |
| DKC1     | 0          | 4                 | SNRPN    | 0          | 2                 | HIST1H2BN | 1          | 3                 |
| PPIB     | 0          | 4                 | SRSF5    | 0          | 1                 | HIST1H2BC | 1          | 3                 |
| KRT16    | 0          | 4                 | SRSF6    | 0          | 1                 | HIST1H2BK | 1          | 3                 |
| KRT6B    | 0          | 5                 | SRSF4    | 0          | 1                 | HIST2H2BF | 1          | 3                 |
| XRCC6    | 0          | 4                 | HIST1H4A | 0          | 1                 | HIST1H2BM | 1          | 3                 |
| SF3B1    | 0          | 4                 | SRSF7    | 0          | 1                 | HIST1H2BD | 1          | 3                 |
| PURA     | 0          | 4                 | TARS     | 0          | 1                 | H2BFS     | 1          | 3                 |
| LRPPRC   | 0          | 3                 | STAU1    | 0          | 1                 | HIST1H2BL | 1          | 3                 |
| CTSG     | 0          | 4                 | HADHA    | 0          | 1                 | MSN       | 9          | 26                |
| RPP30    | 0          | 3                 | GRSF1    | 0          | 1                 | DDX5      | 6          | 16                |
| DARS     | 0          | 5                 | VASP     | 0          | 1                 | KHS       | 3          | 8                 |
| EEF1D    | 0          | 2                 | DARS2    | 0          | 2                 | HNRNPA2B1 | 2          | 5                 |
| LMNB1    | 0          | 6                 | NUDT21   | 0          | 2                 | PABPC4    | 5          | 12                |

|          |   |   |          |   |   |         |    |    |
|----------|---|---|----------|---|---|---------|----|----|
| XRCC5    | 0 | 4 | SNRPA    | 0 | 1 | DHX15   | 5  | 12 |
| PRPF19   | 0 | 3 | SNRPB2   | 0 | 1 | ILF2    | 6  | 14 |
| RPL22    | 0 | 2 | ACTL6A   | 0 | 1 | ILF3    | 11 | 24 |
| COPB2    | 0 | 3 | CPSF2    | 0 | 1 | HNRNPD  | 5  | 10 |
| EIF2S3   | 0 | 4 | DDX39B   | 0 | 1 | EWSR1   | 1  | 2  |
| FUS      | 0 | 2 | DDX39A   | 0 | 1 | DCD     | 1  | 2  |
| QARS     | 0 | 5 | COPA     | 0 | 1 | ERI3    | 1  | 2  |
| RBMX     | 0 | 4 | ASPH     | 0 | 1 | ME2     | 1  | 2  |
| AP2B1    | 0 | 3 | CSDE1    | 0 | 1 | DDX17   | 8  | 15 |
| HNRNPM   | 0 | 2 | HAS1     | 0 | 1 | NSUN2   | 8  | 15 |
| PSPC1    | 0 | 2 | POLR3A   | 0 | 1 | PABPC1  | 12 | 22 |
| SRSF2    | 0 | 2 | DDX18    | 0 | 1 | HNRNPA1 | 4  | 7  |
| SRSF8    | 0 | 2 | SRBD1    | 0 | 1 | NONO    | 4  | 7  |
| PES1     | 0 | 4 | RPL31    | 0 | 1 | HNRNPU  | 12 | 20 |
| PTBP1    | 0 | 2 | RBM28    | 0 | 1 | KHDRBS1 | 3  | 5  |
| RSL1D1   | 0 | 4 | RAP1GAP2 | 0 | 1 | MCCC2   | 7  | 11 |
| ACADVL   | 0 | 3 | EIF2S2   | 0 | 1 | HNRNPR  | 11 | 17 |
| HNRNPUL1 | 0 | 2 | VAV1     | 0 | 1 | SYNCRIP | 12 | 18 |
| CCAR2    | 0 | 3 | RPSA     | 0 | 1 | PABPN1  | 6  | 9  |
| CHI3L1   | 0 | 2 | ESRP1    | 0 | 1 | GAPDH   | 4  | 6  |
| HNRNPK   | 0 | 2 | ESRP2    | 0 | 1 | HSPA8   | 4  | 6  |
| HDLBP    | 0 | 2 | TRPV5    | 0 | 1 | HNRNPAB | 2  | 3  |
| SRSF1    | 0 | 1 | NEB      | 0 | 1 | HNRNPF  | 2  | 3  |
| SKIV2L2  | 0 | 1 | XRN2     | 0 | 1 | DHX9    | 27 | 40 |
| NOP56    | 0 | 3 | DLST     | 0 | 1 | NCL     | 15 | 22 |

### Supplemental Table 10. Translation involving proteins

| Kinds of Proteins | Name of Proteins |
|-------------------|------------------|
|-------------------|------------------|

|                                           |                                                |
|-------------------------------------------|------------------------------------------------|
| Ribosomal proteins                        | RPL22, RSL1D1, RPS9,RPL7, RPS3A,<br>RPL31,RPSA |
| Eukaryotic translation initiation factors | EIF2S3, EIF3B, EIF2S2,EIF2S1, EIF3A            |
| Eukaryotic translation elongation factors | EEF1G, EEF1D                                   |

**Supplemental Table 11. Information of antibodies used in this study.**

| Antibody | corporation | Cat.No. | Antibody | corporation | Cat.No. |
|----------|-------------|---------|----------|-------------|---------|
|----------|-------------|---------|----------|-------------|---------|

|                   |             |            |                    |             |            |
|-------------------|-------------|------------|--------------------|-------------|------------|
| anti-MYBL2        | Santa Cruz  | sc-390198  | anti-STAT5         | CST         | #25656     |
| anti-FLT3         | CST         | #3462      | anti-Phospho-STAT5 | CST         | #4322      |
| anti-phospho-FLT3 | CST         | #4577      | anti-c-MYC         | CST         | #5605      |
| anti-PTBP1        | Proteintech | 12582-1-AP | anti-DHX9          | Santa Cruz  | sc-137198  |
| anti-IGF2BP2      | Santa Cruz  | sc-377014  | anti-ILF2          | Santa Cruz  | sc-365283  |
| anti-SYNCRIP      | Santa Cruz  | sc-271003  | anti-hnRNPA1       | CST         | #8443      |
| anti-Flag         | Sigma       | F7425      | anti-GAPDH         | Proteintech | 10494-1-AP |

## Supplemental materials and methods

### RNA isolation and quantitative real-time PCR (RT-PCR)

Total RNA was extracted using TRIzol reagent (Invitrogen, USA) in accordance with the manufacturer's instructions and was then stored at -80°C. RNA was reverse transcribed into cDNA using the RT reagent Kit RR047A (Takara, Japan) for real-time PCR with a SYBR Premix ExTaq real-time PCR Kit (Takara, Japan). All gene expression levels were normalized to GAPDH. Oligonucleotide sequences are shown in **supplemental Table 5**.

### **Immunoblotting**

Proteins were resolved by 10% or 12% Bis-Tris polyacrylamide gels and transferred to polyvinylidene fluoride membranes. Membranes were blocked in 5% BSA for 1h and probed with the appropriate antibody overnight at 4°C and then incubated with horseradish peroxidase-conjugated secondary antibodies at room temperature for 1h. Membranes were visualized with an enhanced chemoluminescence detection system. Detail information of antibody was mentioned in **supplemental Table 10**.

### **CircRNA overexpression vector construction**

We constructed a universal exon circRNA expression vector containing flanking introns which insure the correct splicing and thus we need to only insert the exon sequences to express circRNA. The introns we used from SUZ12 are a natural pair of introns surrounding the same exon, because its 5' intron has a canonical branch point site to facilitate a correct splicing and the 3' intron is short. We also add a sequence which is the reverse complement repeats of the first 100 bp of 5' intron component into the vector following the 3' intron to promote the interaction between the flanking introns, facilitating circRNA product. All intron sequences were cloned in pCDH-CMV-MCS-EF1-Puro-copGFP vector. Sequences of exon 8-9 of MYBL2 were inserted into the vector and circMYBL2 was highly expressed about 100 fold in 293t.

### **Cell transfection and lentivector expression systems**

Transient transfection of recombinant vectors were performed using the

Lipofectamine 2000/3000 (Invitrogen, USA) system, and transient transfections of siRNAs was performed using the Neon Transfection System with 10 µl reactions according to the manufacturer's guidelines (Invitrogen, USA). For stable expression assays, lentiviral expression vectors, including pGreenPuro™ shRNA and recombinant pCDH-CMV-MCS-EF1-Puro-copGFP eukaryotic expression vector, were packaged into lentiviruses using Lentivector Expression Systems (System Biosciences, Germany) consisting of pPACKH1-GAG, pPACKH1-REV, and pVSV-G. Finally, the lentiviruses were transformed into THP-1, MV4-11 and Molm13 cells, and the transformed cells were then selected with puromycin.

### **Cell proliferation CCK-8 assays and flow cytometric analysis.**

Cell proliferation was measured using Cell Counting Kit-8 (Dojindo Molecular Technologies, China). For the CCK-8 assay, cells transfected with siRNAs were seeded at a density of 20,000 cells per well in 100 µL of complete medium in 96-well plates. Absorbance was measured on a VICTOR™ X5 Multilabel Plate Reader (PerkinElmer, USA) at wavelengths of 480 and 630 nm at 0, 24, 48, 72 and 96 hours. For cell-cycle progression analysis, cells were stained with propidium iodide (Lianke, China) for 30 minutes in the dark and were analyzed by flow cytometry (BD, USA). For apoptosis analysis, cells were stained with Annexin V/FITC and 7AAD for 15 minutes in the dark (Lianke, China) and were then analyzed by flow cytometry (BD, USA). For differentiation analysis, cells were stained with human PE-conjugated anti-CD14 and APC-conjugated anti-CD11b (BD Biosciences) and analyzed by flow cytometry (BD, USA).

### **Colony forming cell (CFC) assay**

A total of 1000 MOLM-13 cells were used per CFC assay and were added to 3 mL of methylcellulose media (R&D, USA). The vial was vigorously vortexed to thoroughly mix cells with the media. Media was allowed to stand until air bubbles disappeared. Next, we added 1.1 mL of the final cell mixture to each 35 mm culture dish. Two sample dishes and an uncovered dish containing 3-4 mL of sterile water were then

placed into a 100 mm culture dish with a cover. Cells were incubated for 8 days at 37°C and 5% CO<sub>2</sub>.

### **Ribosome profiling**

Sh-NC and sh-circMYBL2 MOLM-13 cells were pretreated with cycloheximide (100ug/ml; Sigma, Germany) for 5 minutes and then detergent lysis was performed with flash-freezing in liquid nitrogen. For ribosome profiling, DNase I-treated lysates were treated with RNase I, and ribosome-protected fragments were purified as previously described.<sup>59</sup> For RNA-seq, total RNA was extracted and ribosomal RNA was depleted with RiboMinus Eukaryote Kit (Thermo,USA). Library construction was used QIAseq® miRNA Library Kit. Ribosome profiling and RNA-seq libraries were sequenced with Illumina NextSeq 500 and Illumina Novaseq.

### **TRSA RNA pull-down assay**

TRSA RNA pull-down assays were performed based on previous publications<sup>50,51</sup> with modifications. The linearized form of the circMYBL2 sequence was cloned into the pcDNA3 plasmid with the tRSA tag at its 5' end. RNA products were transcribed in vitro using the TranscriptAid T7 High Yield Transcription Kit (Thermo, USA) and were then purified using the GeneJET RNA Purification Kit (Thermo, USA). The RNA pulldown assay was performed using the Pierce Magnetic RNA-Protein Pull-Down Kit in accordance with the manufacturer's instructions.

### **RNA In Situ Hybridization**

Cy3-labeled oligonucleotide probes were designed and synthesized by RiboBio corporation. Cells were fixed with 3.6% PFA and 10% acetic acid for 15 minutes and then permeabilized with 0.5% Triton X-100 for 5 min on ice. Cells were incubated with Cy3-labeled FISH probes dissolved by 50% formamide in 2xSSC at 37°C overnight. The nuclei were counterstained with DAPI.
